# Supplementary material for: Cognitive function and treatment response trajectories in first-episode schizophrenia: evidence from a prospective cohort study
Source: PubMed Central journal article supplement (PMC9680154; doi:10.1136/bmjopen-2022-062570), 2022-11-21
Supplement: bmjopen-2022-062570.draft_revisions.pdf [file bmjopen-2022-062570.draft_revisions.pdf]

# BMJ Open

BMJ Open is committed to open peer review. As part of this commitment we make the peer review history of every article we publish publicly available.

When an article is published we post the peer reviewers' comments and the authors' responses online. We also post the versions of the paper that were used during peer review. These are the versions that the peer review comments apply to.

The versions of the paper that follow are the versions that were submitted during the peer review process. They are not the versions of record or the final published versions. They should not be cited or distributed as the published version of this manuscript.

BMJ Open is an open access journal and the full, final, typeset and author-corrected version of record of the manuscript is available on our site with no access controls, subscription charges or pay-per-view fees (<http://bmjopen.bmj.com>).

If you have any questions on BMJ Open's open peer review process please email [info.bmjopen@bmj.com](mailto:info.bmjopen@bmj.com)

# BMJ Open

## Cognitive function and treatment response trajectories in first episode schizophrenia: evidence from a prospective cohort study.

|                               |                                                                                                                                                                                                                                                                                                                                                                                                                                                                                                                                                                                                                                                                                                                                                                                                                                                                                                                                                                                                                                                                                                                                                                                                                                                                                                                                                                                                                                                                                                                                                                                                                                                                                                                                                                                                                                                                                                                                                                                                                                                                                                                                                                                                                                                                                                                                                                                                                                                       |
|-------------------------------|-------------------------------------------------------------------------------------------------------------------------------------------------------------------------------------------------------------------------------------------------------------------------------------------------------------------------------------------------------------------------------------------------------------------------------------------------------------------------------------------------------------------------------------------------------------------------------------------------------------------------------------------------------------------------------------------------------------------------------------------------------------------------------------------------------------------------------------------------------------------------------------------------------------------------------------------------------------------------------------------------------------------------------------------------------------------------------------------------------------------------------------------------------------------------------------------------------------------------------------------------------------------------------------------------------------------------------------------------------------------------------------------------------------------------------------------------------------------------------------------------------------------------------------------------------------------------------------------------------------------------------------------------------------------------------------------------------------------------------------------------------------------------------------------------------------------------------------------------------------------------------------------------------------------------------------------------------------------------------------------------------------------------------------------------------------------------------------------------------------------------------------------------------------------------------------------------------------------------------------------------------------------------------------------------------------------------------------------------------------------------------------------------------------------------------------------------------|
| Journal:                      | <i>BMJ Open</i>                                                                                                                                                                                                                                                                                                                                                                                                                                                                                                                                                                                                                                                                                                                                                                                                                                                                                                                                                                                                                                                                                                                                                                                                                                                                                                                                                                                                                                                                                                                                                                                                                                                                                                                                                                                                                                                                                                                                                                                                                                                                                                                                                                                                                                                                                                                                                                                                                                       |
| Manuscript ID                 | bmjopen-2022-062570                                                                                                                                                                                                                                                                                                                                                                                                                                                                                                                                                                                                                                                                                                                                                                                                                                                                                                                                                                                                                                                                                                                                                                                                                                                                                                                                                                                                                                                                                                                                                                                                                                                                                                                                                                                                                                                                                                                                                                                                                                                                                                                                                                                                                                                                                                                                                                                                                                   |
| Article Type:                 | Original research                                                                                                                                                                                                                                                                                                                                                                                                                                                                                                                                                                                                                                                                                                                                                                                                                                                                                                                                                                                                                                                                                                                                                                                                                                                                                                                                                                                                                                                                                                                                                                                                                                                                                                                                                                                                                                                                                                                                                                                                                                                                                                                                                                                                                                                                                                                                                                                                                                     |
| Date Submitted by the Author: | 04-Mar-2022                                                                                                                                                                                                                                                                                                                                                                                                                                                                                                                                                                                                                                                                                                                                                                                                                                                                                                                                                                                                                                                                                                                                                                                                                                                                                                                                                                                                                                                                                                                                                                                                                                                                                                                                                                                                                                                                                                                                                                                                                                                                                                                                                                                                                                                                                                                                                                                                                                           |
| Complete List of Authors:     | <p>Millgate, Edward; King's College London Institute of Psychiatry Psychology and Neuroscience, Department of Psychosis Studies<br/> Griffiths, Kira; King's College London Institute of Psychiatry Psychology and Neuroscience, Department of Psychosis Studies<br/> Egerton, Alice; King's College London Institute of Psychiatry Psychology and Neuroscience, Department of Psychosis Studies; South London and Maudsley NHS Foundation Trust, NIHR Biomedical Research Centre<br/> Kravariti, Eugenia; King's College London Institute of Psychiatry Psychology and Neuroscience, Department of Psychosis Studies; South London and Maudsley NHS Foundation Trust, NIHR Biomedical Research Centre<br/> Casetta, Cecilia; King's College London Institute of Psychiatry Psychology and Neuroscience, Department of Psychosis Studies; South London and Maudsley Mental Health NHS Trust, National Psychosis Service<br/> Deakin, JFW; University of Manchester, Faculty of Medicine, Biology and Health; Greater Manchester Mental Health NHS Foundation Trust<br/> Drake, Richard; University of Manchester, Division of Psychology &amp; Mental Health; Greater Manchester Mental Health NHS Foundation Trust<br/> Howes, Oliver; King's College London Institute of Psychiatry Psychology and Neuroscience, Department of Psychosis Studies; South London and Maudsley NHS Foundation Trust, NIHR Biomedical Research Centre<br/> Kassoumeri, Laura; King's College London Institute of Psychiatry Psychology and Neuroscience, Department of Psychosis Studies<br/> Khan, Sobia; University of Manchester, Faculty of Medicine, Biology and Health<br/> Lankshear, Steve; Greater Manchester Mental Health NHS Foundation Trust<br/> Lees, Jane; Greater Manchester Mental Health NHS Foundation Trust; University of Manchester, Faculty of Medicine, Biology and Health<br/> Lewis, Shon; University of Manchester; Greater Manchester Mental Health NHS Foundation Trust<br/> Mikulskaya, Elena; University of Manchester, Faculty of Medicine, Biology and Health<br/> Oloyede, Ebenezer; King's College London Institute of Psychiatry Psychology and Neuroscience, Department of Psychosis Studies; South London and Maudsley NHS Foundation Trust, Pharmacy Department<br/> Owens, Rebecca; University of Manchester, Faculty of Medicine, Biology and Health<br/> Pollard, Rebecca; King's College London Institute of Psychiatry</p> |

1  
2  
3  
4  
5  
6  
7  
8  
9  
10  
11  
12  
13  
14  
15  
16  
17  
18  
19  
20  
21  
22  
23  
24  
25  
26  
27  
28  
29  
30  
31  
32  
33  
34  
35  
36  
37  
38  
39  
40  
41  
42  
43  
44  
45  
46  
47  
48  
49  
50  
51  
52  
53  
54  
55  
56  
57  
58  
59  
60

|           |                                                                                                                                                                                                                                                                                                                                                                                                                                                                                                                                                                                                                                                                                                                                                                                                                                           |
|-----------|-------------------------------------------------------------------------------------------------------------------------------------------------------------------------------------------------------------------------------------------------------------------------------------------------------------------------------------------------------------------------------------------------------------------------------------------------------------------------------------------------------------------------------------------------------------------------------------------------------------------------------------------------------------------------------------------------------------------------------------------------------------------------------------------------------------------------------------------|
|           | Psychology and Neuroscience, Department of Psychosis Studies<br>Rich, Nathalie; University College London, Department of Epidemiology &<br>Applied Clinical Research<br>Smart, Sophie; Cardiff University, Division of Psychological Medicine and<br>Clinical Neurosciences<br>Segev , Aviv; King's College London Institute of Psychiatry Psychology<br>and Neuroscience, Department of Psychosis Studies; Shalvata Mental<br>Health Center, Sackler Faculty of Medicine<br>Verena Sendt , Kyra; King's College London Institute of Psychiatry<br>Psychology and Neuroscience, Department of Psychosis Studies<br>MacCabe, James; Institute of Psychiatry Psychology and Neuroscience<br>Division of Academic Psychiatry, Department of Psychosis Studies; South<br>London and Maudsley NHS Foundation Trust, National Psychosis Service |
| Keywords: | Schizophrenia & psychotic disorders < PSYCHIATRY, Adult psychiatry <<br>PSYCHIATRY, MENTAL HEALTH                                                                                                                                                                                                                                                                                                                                                                                                                                                                                                                                                                                                                                                                                                                                         |
|           |                                                                                                                                                                                                                                                                                                                                                                                                                                                                                                                                                                                                                                                                                                                                                                                                                                           |

SCHOLARONE™  
Manuscripts

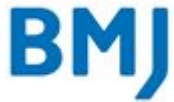

I, the Submitting Author has the right to grant and does grant on behalf of all authors of the Work (as defined in the below author licence), an exclusive licence and/or a non-exclusive licence for contributions from authors who are: i) UK Crown employees; ii) where BMJ has agreed a CC-BY licence shall apply, and/or iii) in accordance with the terms applicable for US Federal Government officers or employees acting as part of their official duties; on a worldwide, perpetual, irrevocable, royalty-free basis to BMJ Publishing Group Ltd ("BMJ") its licensees and where the relevant Journal is co-owned by BMJ to the co-owners of the Journal, to publish the Work in this journal and any other BMJ products and to exploit all rights, as set out in our [licence](#).

The Submitting Author accepts and understands that any supply made under these terms is made by BMJ to the Submitting Author unless you are acting as an employee on behalf of your employer or a postgraduate student of an affiliated institution which is paying any applicable article publishing charge ("APC") for Open Access articles. Where the Submitting Author wishes to make the Work available on an Open Access basis (and intends to pay the relevant APC), the terms of reuse of such Open Access shall be governed by a Creative Commons licence – details of these licences and which [Creative Commons](#) licence will apply to this Work are set out in our licence referred to above.

Other than as permitted in any relevant BMJ Author's Self Archiving Policies, I confirm this Work has not been accepted for publication elsewhere, is not being considered for publication elsewhere and does not duplicate material already published. I confirm all authors consent to publication of this Work and authorise the granting of this licence.

**Journal: BMJ Open**

**Abstract word count: 295**

**Word count: 3582**

**Submission date: 4<sup>th</sup> March 2022**

# **Cognitive function and treatment response trajectories in first episode schizophrenia: evidence from a prospective cohort study.**

Edward Millgate<sup>1</sup>, Kira Griffiths<sup>1</sup>, Alice Egerton<sup>1,2</sup>, Eugenia Kravariti<sup>1,2</sup>, Cecilia Casetta<sup>1,3</sup>, Bill Deakin<sup>4,5</sup>, Richard J Drake<sup>4,5,6</sup>, Oliver D Howes<sup>1,2</sup>, Laura Kassoumeri<sup>1</sup>, Sobia Khan<sup>4</sup>, Steve Lankshear<sup>5</sup>, Jane Lees<sup>4,5,6</sup>, Shôn Lewis<sup>4,5,6</sup>, Elena Mikulskaya<sup>4</sup>, Ebenezer Oloyede<sup>1,7</sup>, Rebecca Owens<sup>4</sup>, Rebecca Pollard<sup>1</sup>, Nathalie Rich<sup>8</sup>, Sophie E Smart<sup>9</sup>, Aviv Segev<sup>1,10,11</sup>, Kyra-Verena Sendt<sup>1</sup>, The STRATA Consortium, James H MacCabe<sup>1,3\*</sup>

<sup>1</sup> Department of Psychosis Studies, Institute of Psychiatry, Psychology and Neuroscience, King's College London, UK

<sup>2</sup> NIHR Biomedical Research Centre at South London and Maudsley NHS Foundation Trust, London, UK

<sup>3</sup> National Psychosis Service, South London and Maudsley NHS Foundation Trust, London, UK

<sup>4</sup> Division of Psychology and Mental Health, School of Biological Sciences, Faculty of Biology, Medicine and Health, University of Manchester, Manchester, UK

<sup>5</sup> Greater Manchester Mental Health NHS Foundation Trust, Manchester, UK

<sup>6</sup> Manchester Academic Health Science Centre, Manchester, UK

<sup>7</sup> Pharmacy Department, South London and Maudsley NHS Foundation Trust, UK

<sup>8</sup> Department of Epidemiology & Applied Clinical Research, University College London, UK

<sup>9</sup> MRC Centre for Neuropsychiatric Genetics and Genomics, Division of Psychological Medicine and Clinical Neurosciences, Cardiff University, Cardiff, UK

<sup>10</sup> Shalvata Mental Health Centre, Israel

<sup>11</sup> Sackler Faculty of Medicine, Tel Aviv University, Israel

\*Corresponding author: Edward.millgate@kcl.ac.uk

1  
2  
3 Department of Psychosis Studies,  
4  
5 Institute of Psychiatry, Psychology & Neuroscience,  
6  
7 16 de Crespigny Park,  
8  
9 Denmark Hill, London,  
10  
11 United Kingdom, SE5 8AF  
12  
13  
14  
15  
16  
17  
18  
19  
20  
21  
22  
23  
24  
25  
26  
27  
28  
29  
30  
31  
32  
33  
34  
35  
36  
37  
38  
39  
40  
41  
42  
43  
44  
45  
46  
47  
48  
49  
50  
51  
52  
53  
54  
55  
56  
57  
58  
59  
60

For peer review only

## Abstract

*Objectives:* This prospective cohort study tested for associations between baseline cognitive performance in individuals early within their first episode and antipsychotic treatment of psychosis. We hypothesised that poorer cognitive functioning at the initial assessment would be associated with poorer antipsychotic response following the subsequent six weeks.

*Setting:* NHS service users with a first episode schizophrenia diagnosis, recently starting antipsychotic medication, recruited from two UK sites (King's College London, UK & University of Manchester, UK). Participants attended three study visits following screening.

*Participants:* Eighty-nine participants were recruited, with 46 included in the main analysis. Participants required to be within the first two years of illness onset, had received minimal antipsychotic treatment, have the capacity to provide consent, and be able to read and write in English. Participants were excluded if they met remission criteria or showed mild to no symptoms.

*Primary and secondary outcomes:* Antipsychotic response was determined at 6-weeks using the Positive and Negative Syndrome Scale (PANSS), with cognitive performance assessed at each visit using the Brief Assessment of Cognition in Schizophrenia (BACS). The groups identified (responders and non-responders) from trajectory analyses, as well as from >20% PANSS criteria, were compared on baseline BACS performance.

*Results:* Trajectory analyses identified 84.78% of the sample as treatment responsive, and the remaining 15.22% as treatment non-responsive. Unadjusted and adjusted logistic regressions observed no significant relationship between baseline cognitive performance and antipsychotic response.

*Conclusions:* This investigation identified two clear trajectories of treatment response in the first six weeks of antipsychotic treatment. Responder and non-responder groups did not significantly differ on performance on the BACS, suggesting that larger samples may be required or that brief cognitive batteries for schizophrenia may not be a useful predictor of response in the first two-years of illness onset.

*Trial registration number:* REC: 17/NI/0209

*Keywords:* cognition, antipsychotic response, BACS, trajectories, first episode schizophrenia

## Article summary

### *Strengths and limitations of this study*

- The study examined baseline cognitive performance in a relatively large sample of first-episode schizophrenia, with patients recently starting antipsychotic treatment.
- Trajectory analyses used identified two clear patterns of antipsychotic response at 6-weeks after baseline assessment.
- The lack of significant group differences in baseline cognitive performance between antipsychotic responders and non-responders may be a result of under-sampled comparisons or that brief cognitive batteries for schizophrenia may not be a useful predictor of response in the first two-years of illness onset.



## Introduction

Prompt intervention with pharmacological therapy for individuals with schizophrenia has been extensively recommended in the literature<sup>1,2</sup> and is reported to be associated with better functional outcomes<sup>3,4,5</sup>. As observed by Carbon & Correll<sup>5</sup>, a lack of early response and improvement to antipsychotic medication is a strong predictor of later non-response. A recent diagnostic test review has even argued that non/minimal response to antipsychotic medication in the first 2 weeks of treatment may be a sufficient indication to switch antipsychotic<sup>6</sup>. Early and accurate detection of treatment non-responders at first episode is also more likely to result in timely treatment with clozapine, which may be associated with better outcomes<sup>7</sup>. Indeed, Yoshimura et al<sup>8</sup> found that response to clozapine was ~80% in treatment resistant patients who were commenced on clozapine early in their illness course, with this depreciating to ~30% when clozapine initiation was delayed by more than 2.8years<sup>7,8</sup>.

Early cognitive deficits may be predictive of subsequent antipsychotic response. Cognitive dysfunction in schizophrenia is observable prior to illness onset<sup>9,10</sup> and is strongly associated with poorer functional outcomes<sup>11,12,13</sup>. A recent meta-analysis comparing cognitive performance in known cases of antipsychotic treatment resistance and response<sup>14</sup> observed worse performance in treatment resistant samples across cognitive domains, with the strongest effect in measures of verbal memory and learning and language functions. However, it is possible that illness chronicity and exposure to long-term antipsychotic treatment may have influenced these findings.

This prospective cohort study tested for associations between baseline cognitive performance, assessed at the initiation of antipsychotic treatment, in individuals early within their first episode of psychosis and their subsequent response to antipsychotic treatment. We hypothesised that poorer cognitive functioning at the initial assessment would be associated with poorer response over the subsequent six weeks of antipsychotic treatment.

## Methods

### *Design*

The study used a prospective cohort design with a sample of patients with first-episode schizophrenia. Participants were assessed over a period of 6-weeks, with two follow-up visits following baseline and screening assessments.

### *Setting*

The study was part of the ‘Schizophrenia: Treatment Resistance and Therapeutic Advances’ (STRATA) consortium which included two UK sites in this study; King’s College London (London, UK) and University of Manchester (Manchester, UK). The aim of the STRATA consortium is to identify neurobiological, cognitive, and genetic biomarkers of antipsychotic treatment resistance and non-response within schizophrenia and other related psychotic disorders.

### *Patient and Public Involvement*

In the early development and design of the study consultations with the NIHR Maudsley Biomedical Research Centre (BRC) Service User Advisory Group (SUAG) took place to determine the feasibility of the study and its’ assessments for service users. The NIHR Maudsley BRC Feasibility and Acceptability Support Team for Researchers (FAST-R) service was also used in order to receive feedback on consent forms, information sheets and protocols, as well as advice for recruitment strategies for service users.

### *Participants*

89 participants aged between 18 – 65 years with a DSM-5 diagnosis of schizophrenia, schizoaffective, schizophreniform disorder, or psychosis (non-specified) (ICD-10: F20-F29) were recruited across two UK sites (King’s College London and University of Manchester). Inclusion required that participants were within the first two years of illness onset, defined using the date of first initial contact with services and clinical records. Inclusion also required that participants had received minimal antipsychotic medication, which was defined as having received antipsychotic treatment for no longer than 4 weeks prior to the baseline visit, after a period of being either antipsychotic naïve or antipsychotic-free for at least 14 days. Participants also were required to have the capacity to provide consent and the ability to read and write in English. Participants were excluded if they met modified Andreasen remission criteria<sup>15</sup>, having mild or less scores on all of the following Structured Clinical Interview-Positive and Negative Syndrome Scale (SCI-PANSS)<sup>23</sup> items: delusions (P1),

1  
2  
3 conceptual disorganisation (P2), hallucinatory behaviour (P3), blunted affect (N1), social  
4 withdrawal (N4), lack of spontaneity (N6), mannerisms/posturing (G5), unusual thought  
5 content (G9) on the day of assessment, as this would suggest that their symptoms were in  
6 remission.  
7  
8  
9

10  
11  
12  
13 Participants were assessed at baseline ( $\pm 7$ days), 2-weeks ( $\pm 7$ days) and 6-weeks ( $\pm 7$   
14 days), with the maximum cut-off for 6-week follow up being 78 days after baseline  
15 assessment. Participants were reimbursed for their time and expenses for participation in the  
16 study. Twenty-six participants were withdrawn after providing consent, an additional 11 were  
17 withdrawn following baseline, and another 6 participants withdrawn following 2-week  
18 assessment. Participants were withdrawn if they were unable to attend the study visit, their  
19 symptoms were in remission (as per Andreasen remission criteria<sup>15</sup>), or if they no longer  
20 wanted to take part in the study and requested to have their data removed. 46 participants  
21 were eligible for inclusion in the analysis. All participants gave informed consent prior to  
22 enrolment. This study was approved by the Health and Social Care Research Ethics  
23 Committee A; REC: 17/NI/0209. All participants provided informed consent prior to  
24 participation.  
25  
26  
27  
28  
29  
30  
31  
32  
33  
34  
35

### 36 *Definitions for treatment response status*

37

38 Treatment response groups were modelled through trajectory analyses using the *traj*  
39 command in STATA<sup>16</sup>. This tool estimates group-based trajectories over a specified time  
40 interval, clustering individuals who follow similar trajectories through a censored normal  
41 model. Akaike information criterion (AIC) and Bayesian information criterion (BIC) values  
42 were used to select the trajectory model with the lowest AIC and BIC values. Linear  
43 trajectories of up to five classes (1 to 5 trajectories) were assessed for eligibility. Rescaled  
44 PANSS scores<sup>17</sup> for percentage change at weeks 2 and 6 were used in the model. The results  
45 generated using this trajectory grouping were also compared to a more standard definition of  
46 treatment response which uses a  $>20\%$  reduction in rescaled PANSS total scores from initial  
47 to final assessment<sup>18,19</sup>. Here patients not reaching a 20% reduction in rescaled PANSS total  
48 scores at the 6-week visits were categorised as non-responsive. These results are reported in  
49 the supplementary material.  
50  
51  
52  
53  
54  
55  
56  
57  
58  
59  
60

## Materials

### *Clinical and demographic measures*

At baseline, participants completed the Kemp Clinician Rating Scale (CRS)<sup>20,21</sup>, Mini-international neuropsychiatric interview (MINI)<sup>22</sup> (M-Psychotic Disorders; A-Major Depressive Episode; D-Manic/Hypomanic/Bipolar), Structured Clinical Interview- Positive and Negative Syndrome Scale (SCI-PANSS)<sup>23</sup>, Clinician Rating Scale for Schizophrenia (CGI-SCH)<sup>24</sup> and provided demographic data. At each subsequent study visit the CRS, SCI-PANSS and CGI-SCH were repeated.

### *Neuropsychological assessment*

Participants completed Version A of the Brief Assessment of Cognition in Schizophrenia (BACS)<sup>25</sup> at each study visit. The BACS was originally developed to assess cognitive functioning in schizophrenia, while also being an easily administrable and brief test battery<sup>25</sup>. The battery includes tasks pertaining to executive functions, working memory, motor/processing speed, verbal memory, verbal fluency, and attention cognitive domains. Version A includes the following tasks: i) list learning task (verbal memory); ii) digit sequencing task (working memory); iii) token motor task (motor speed); iv) category instances task (verbal fluency); v) symbol coding task (attention and speed of information processing) and vi) tower of London (executive function). All tasks on the BACS are scored such that higher scores represent better performance. Composite t and z scores for the BACS were generated using scores from published normative data<sup>26</sup>.

### *Data analysis*

All analyses were conducted in STATA 15/SE<sup>27</sup>. Independent t-tests were used to compare cognitive performance and symptom severity in the whole sample between visits (i.e. baseline assessment to 2-week, 2-week to 6-week, and baseline to 6-week). Baseline cognitive performance on the BACS was compared between trajectory groups using multivariable logistic regressions on the BACS composite and subscale scores. All models were adjusted for age, gender, and days from 1<sup>st</sup> psychotic symptom to baseline antipsychotic medication (i.e. duration of untreated psychosis; DUP). Results were then compared to

groupings based on >20% reduction in rescaled PANSS total scores<sup>18,19</sup> from baseline assessment to 6-week follow-up (supplementary material Table S.2).

Finally, growth curve models were executed using the *xtmixed* command<sup>28</sup> to compare cognitive performance over time between trajectory groups to estimate any changes in cognitive performance over the study period (supplementary material Table S.3). These results were again compared to >20% PANSS reduction criteria for treatment response (supplementary material Table S.4).

## Results

Table 1 reports the demographic descriptive of the whole sample included in analysis (N = 46) at baseline, with PANSS symptom severity scores and BACS performance for each study visit illustrated in Table 2. Data regarding antipsychotic medication was provided by all participants at baseline, all of which were treated with 2<sup>nd</sup> generation antipsychotics. At baseline 45 participants provided PANSS symptom severity ratings, with 41 providing at least one baseline measure of the BACS (Table 2).

Between study visits, a significant improvement in PANSS positive symptoms scores was observed in the whole sample between baseline and 2-week visits, as well as baseline and 6-week assessments (Table 2). A significant improvement in PANSS total scores was observed between baseline and 6-week visits.

Table 1

*Descriptive statistics of the whole sample demographics at consent (age) and baseline assessments*

| Variable                 | N              | M     | SD   | Min | Max |
|--------------------------|----------------|-------|------|-----|-----|
| Age (at consent)         | 46             | 27.30 | 8.17 | 18  | 50  |
| Gender ( <i>male</i> )   | 33<br>(71.74%) | -     | -    | -   | -   |
| Gender ( <i>female</i> ) | 13<br>(28.26%) | -     | -    | -   | -   |

|                                                                                                    |    |                                                                                                                                         |        |    |      |
|----------------------------------------------------------------------------------------------------|----|-----------------------------------------------------------------------------------------------------------------------------------------|--------|----|------|
| Age of illness onset (years)                                                                       | 46 | 26.53                                                                                                                                   | 8.45   | 18 | 49   |
| Duration from 1 <sup>st</sup> Psychotic symptom (days) to baseline antipsychotic (DUP)             | 46 | 248.30                                                                                                                                  | 245.06 | 0  | 726  |
| Duration from 1 <sup>st</sup> contact with mental health services (days) to baseline antipsychotic | 46 | 346.57                                                                                                                                  | 600.37 | 6  | 2358 |
| Chlorpromazine equivalents (mg/day)                                                                | 46 | 176.89                                                                                                                                  | 121.29 | 10 | 800  |
| Number of hospitalisations                                                                         | 46 | 0.89                                                                                                                                    | 0.64   | 0  | 3    |
| Years of education                                                                                 | 42 | 13.62                                                                                                                                   | 2.82   | 5  | 20   |
| CGI-SCH baseline score                                                                             | 56 | Minimally ill = 1<br>Mildly ill = 4<br>Moderately ill = 12<br>Markedly ill = 15<br>Severely ill = 12<br>Among the most severely ill = 1 | -      | -  | -    |
| Antipsychotic medication                                                                           | 51 | Amisulpride = 1<br>Aripiprazole = 19<br>Olanzapine = 16<br>Paliperidone = 1<br>Quetiapine = 4<br>Risperidone = 5                        | -      | -  | -    |

Note. *DUP* = Duration of untreated psychosis; *CGI-SCH* = Clinical Rating Scale for Schizophrenia.

Table 2

*Mean symptom severity as rated by the PANSS and BACS performance for the whole sample for each study visit*

| Variable              | Baseline |       |       | 2-week follow-up |       |       | 6-week follow-up |       |       | Baseline vs 2-week                            | 2-week vs 6-week                              | Baseline vs 6-week                             |
|-----------------------|----------|-------|-------|------------------|-------|-------|------------------|-------|-------|-----------------------------------------------|-----------------------------------------------|------------------------------------------------|
|                       | N        | M     | SD    | N                | M     | SD    | N                | M     | SD    | T-test                                        | T-test                                        | T-test                                         |
| PANSS positive        | 45       | 11.93 | 4.77  | 36               | 9.17  | 5.36  | 38               | 7.26  | 5.13  | t(79) = 2.45, p = .016, 95CIs = 0.52 ; 5.01   | t(72) = 1.56, p = .123, 95CIs = 0.53 ; 4.34   | t(81) = 4.29, p < .001, 95CIs = 2.50 ; 6.84    |
| PANSS negative        | 45       | 10.36 | 6.87  | 36               | 10.31 | 7.15  | 38               | 9.58  | 7.78  | t(79) = 0.03, p = .975, 95CIs = -3.06 ; 3.16  | t(72) = 0.42, p = .677, 95CIs = 2.74 ; 4.19   | t(81) = 0.48, p = .630, 95CIs = 2.42 ; 3.98    |
| PANSS general         | 45       | 19.40 | 8.57  | 36               | 16.64 | 10.60 | 38               | 15.74 | 10.11 | t(79) = 1.30, p = .198, 95CIs = -1.48 ; 7.00  | t(72) = 0.38, p = .709, 95CIs = 3.90 ; 5.70   | t(81) = 1.79, p = .078, 95CIs = 0.42 ; 7.74    |
| PANSS total           | 45       | 41.69 | 16.11 | 36               | 36.11 | 20.03 | 38               | 32.58 | 20.04 | t(79) = 1.39, p = .169, 95CIs = -2.41 ; 13.57 | t(72) = 0.76, p = .451, 95CIs = 5.76 ; 12.82  | t(81) = 2.30, p = .024, 95CIs = 1.22 ; 17.00   |
| BACS Verbal memory    | 41       | 37.83 | 14.02 | 32               | 41.16 | 13.50 | 36               | 44.56 | 15.02 | t(71) = -1.02, p = .310, 95CIs = -9.82 ; 3.16 | t(66) = -0.98, p = .332, 95CIs = 10.35 ; 3.55 | t(75) = -2.03, p = .046, 95CIs = 12.32 ; -0.13 |
| BACS Digit sequencing | 38       | 18.03 | 4.06  | 32               | 17.84 | 4.33  | 34               | 17.85 | 4.69  | t(68) = 0.18, p = .856, 95CIs = -1.82 ; 2.19  | t(64) = -0.01, p = .993, 95CIs = 2.23 ; 2.21  | t(70) = 0.17, p = .867, 95CIs = 1.88 ; 2.23    |
| BACS Verbal fluency   | 42       | 28.60 | 7.85  | 31               | 31.87 | 9.47  | 35               | 30.20 | 8.38  | t(71) = -1.61, p = .111, 95CIs = -7.32 ; 0.77 | t(64) = 0.76, p = .450, 95CIs = 2.72 ; 6.06   | t(75) = -0.87, p = .389, 95CIs = 5.30 ; 2.09   |





### Trajectories of symptom change

BIC and AIC values were generated for five classes of trajectory models (Table 3). Of these both indices indicate that the two-trajectory group is best fitted to the data. This model estimated 73.7% of the sampled population to be from one linear trajectory, with the remaining 26.3% in another.

Table 3  
Selecting a trajectory model using BIC and AIC estimates

| No. of classes  | 1       | 2             | 3                     | 4                             | 5                                  |
|-----------------|---------|---------------|-----------------------|-------------------------------|------------------------------------|
| BIC             | -522.21 | -512.13       | -517.87               | -520.14                       | -525.88                            |
| AIC             | -519.46 | -506.64       | -509.64               | -509.17                       | -512.17                            |
| % in each class | 100%    | 73.7% ; 26.3% | 73.7% ; 26.3% ;<br>0% | 60.7% ; 23.7% ;<br>15.6% ; 0% | 60.7% ; 23.7% ;<br>15.6% ; 0% ; 0% |

Note. *BIC* = Bayesian Information Criteria; *AIC* = Akaike's Information Criteria.

The trajectories identified by the *traj* procedure are shown in Figure 1. The trajectories that emerged clearly represented responders versus non-responders. 39 participants (84.78%) of the sample were classified as antipsychotic treatment responsive and 7 as treatment non-responsive (15.22%). For responders, PANSS total score percentage change at 6 weeks was on average -32.89% symptom improvement. For non-responders this was 21.03% indicating a minimal and, in some cases, worsening in symptom severity. Shape estimates and standard errors of antipsychotic response are shown in Table 4. Treatment responders significantly improved over the 6-week period. Descriptive statistics of clinical and demographic variables between both trajectory groups (non-responder; responder) are presented in the supplementary material (Table S.1.) In comparison to those responsive to antipsychotic medication, non-responders were on average older, had a longer duration of time from first contact with mental health services to baseline antipsychotic medication, had marginally more hospitalisations, attained more years of education, and were treated at higher chlorpromazine equivalents (supplementary material Table S.1).

[Figure 1]

Table 4

Parameter estimates and standard errors for both trajectories of antipsychotic response

| Parameters     | Trajectories          |                    |
|----------------|-----------------------|--------------------|
|                | Non-responder (N = 7) | Responder (N = 39) |
| Intercept      | 2.54                  | -3.71              |
| Linear change  | 0.10                  | -0.54              |
| Standard error | 0.06                  | 0.09               |
| T statistic    | 1.61, $p = .111$      | -6.06, $p < .001$  |

*Cognitive performance*

There was a significant improvement in BACS verbal memory and symbol coding performance between baseline and 6-week assessments across the whole sample, with a significant improvement in Tower of London and BACS z and t composite scores between baseline and 2-week visits (Table 2). At baseline assessment, there was no difference in the BACS subscale or composite scores between antipsychotic responders and non-responders identified in the trajectory analysis. (Table 5; Table 6). Growth curve models observed no significant change in cognitive performance over follow-up visits between trajectory groups (supplementary material Figure S.1, Table S.3). A similar pattern in results was observed when >20% PANSS reduction criteria was applied (supplementary material Figure S.2, Table S.4, Table S.5).

Table 5

*Baseline cognitive performance for both trajectory groups*

| BACS measure     | Non-responder |       |       | Responder |       |       |
|------------------|---------------|-------|-------|-----------|-------|-------|
|                  | N             | Mean  | SD    | N         | Mean  | SD    |
| Verbal Memory    | 7             | 37.29 | 9.48  | 34        | 37.94 | 14.89 |
| Digit Sequencing | 6             | 20.17 | 5.38  | 32        | 17.63 | 3.74  |
| Verbal Fluency   | 7             | 30.29 | 7.30  | 35        | 28.26 | 8.01  |
| Token Motor      | 7             | 66.86 | 8.93  | 32        | 65.03 | 11.30 |
| Symbol Coding    | 6             | 47.50 | 6.35  | 33        | 38.82 | 13.66 |
| Tower of London  | 7             | 14.71 | 3.77  | 30        | 14.87 | 4.69  |
| tscore composite | 6             | 28.83 | 14.36 | 27        | 26.19 | 11.65 |
| zscore composite | 6             | -2.12 | 1.41  | 27        | -2.39 | 1.16  |

Note. *BACS* =Brief Assessment of Cognition in Schizophrenia.

*Multivariable linear regression*

Univariable and multivariable logistic regression models adjusting for age and gender and duration of untreated psychosis (DUP) found no significant associations between BACS performance at baseline and response trajectory over 6 weeks (Table 6), with no association of any demographic or clinical variables in multivariable models. This was also observed when utilising the >20% reduction in PANSS total criteria (supplementary material Table S.2).

Table 6

Results from univariable and multivariable logistic regression models for response status and baseline BACS performance

| BACS task         | Unadjusted |      |              |      |         | Adjusted for age, gender, and DUP |      |              |      |         |
|-------------------|------------|------|--------------|------|---------|-----------------------------------|------|--------------|------|---------|
|                   | $\beta$    | SE   | 95%CI        | OR   | P-value | $\beta$                           | SE   | 95%CI        | OR   | P-value |
| Verbal Memory     | <0.01      | 0.03 | -0.06 ; 0.06 | 1.00 | .909    | <-0.01                            | 0.03 | -0.07 ; 0.06 | 1.00 | .918    |
| Digit Sequencing  | -0.17      | 0.12 | -0.41 ; 0.07 | 0.84 | .168    | -0.18                             | 0.13 | -0.44 ; 0.07 | 0.83 | .151    |
| Verbal Fluency    | -0.03      | 0.05 | -0.14 ; 0.07 | 0.97 | .530    | -0.05                             | 0.06 | -0.17 ; 0.07 | 0.95 | .417    |
| Token Motor       | -0.02      | 0.04 | -0.09 ; 0.06 | 0.98 | .683    | -0.02                             | 0.05 | -0.11 ; 0.08 | 0.99 | .737    |
| Symbol Coding     | -0.06      | 0.04 | -0.14 ; 0.02 | 0.94 | .145    | -0.07                             | 0.05 | -0.16 ; 0.02 | 0.93 | .114    |
| Tower of London   | 0.08       | 0.09 | -0.18 ; 0.19 | 1.01 | .935    | -0.01                             | 0.10 | -0.20 ; 0.19 | 0.99 | .947    |
| t score composite | -0.02      | 0.04 | -0.10 ; 0.06 | 0.98 | .620    | -0.02                             | 0.04 | -0.10 ; 0.06 | 0.98 | .594    |
| z score composite | -0.21      | 0.40 | -0.99 ; 0.58 | 0.81 | .603    | -0.23                             | 0.41 | -1.02 ; 0.57 | 0.80 | .573    |

Note. BACS = Brief Assessment of Cognition in Schizophrenia; CIs = confidence intervals; DUP = duration of untreated psychosis.

1  
2  
3  
4  
5  
6  
7  
8  
9  
10  
11  
12  
13  
14  
15  
16  
17  
18  
19  
20  
21  
22  
23  
24  
25  
26  
27  
28  
29  
30  
31  
32  
33  
34  
35  
36  
37  
38  
39  
40  
41  
42  
43  
44  
45  
46

For peer review only

## Discussion

This prospective study investigated the relationship between baseline cognitive performance and subsequent antipsychotic response over a 6-week treatment period. Across the whole sample, participants showed an overall reduction in symptom severity as well as an improvement in cognitive performance on the majority of BACS tasks. Trajectory analyses estimated two trajectory groups (73.7%, 26.3%) based on PANSS total % change from baseline; this was reflected as 84.78% of the sample being grouped as treatment responsive, and the remaining 15.22% as treatment non-responsive. Contrary to our hypothesis, baseline cognitive performance did not significantly differ between those identified as treatment responders or non-responders following 6 weeks of antipsychotic treatment. This finding remained the same when treatment response was defined as at least a 20% reduction in PANSS total scores.

Across the two- and six-week follow-up visits, an improvement in cognitive performance was observed for the whole sample verbal memory, symbol coding and Tower of London tasks, as well as the BACS composite scores. Most of these changes occurred between baseline and 2-week assessment (Table 2), with small decreases in performance on measures of verbal fluency, token motor and Tower of London tasks between 2-week and 6-week assessments, as well as for composite z and t scores. In contrast, there was a decline in performance in the token motor task across the follow-up period, and minimal changes in performance in the digit sequencing task.

The observed improvement in cognitive performance may reflect a beneficial outcome of antipsychotic treatment. 1<sup>st</sup> generation antipsychotics, introduced in the 1950s, target the positive symptoms observed in schizophrenia by acting as an antagonist at dopamine D2 receptors. Treatment with this group of antipsychotic drugs has been associated with motor and cognitive deficits in patients<sup>29,30</sup>. In contrast, 2<sup>nd</sup> generation antipsychotics are reported to have fewer extrapyramidal side effects<sup>31</sup>, with these drugs also acting as an antagonist at the serotonin 5HT<sub>2A</sub> receptor, in addition to D2 dopamine receptors. Research suggests that in comparison to 1<sup>st</sup> generation, 2<sup>nd</sup> generation antipsychotics can provide some improvement in cognitive performance (e.g. clozapine<sup>32</sup>). Guilera et al (2009)<sup>33</sup> found in their meta-analysis of 18 randomised controlled trials that 2<sup>nd</sup> generation drugs provided a slight improvement in performance for global cognition, as well as slight but significant

1  
2  
3 improvements in measures of procedural learning, language and verbal comprehension,  
4 verbal learning and memory and visual learning and memory.  
5  
6  
7

8 As the whole study sample was treated with 2<sup>nd</sup> generation antipsychotic drugs at  
9 baseline assessment (Amisulpride = 1, Aripiprazole = 19, Olanzapine = 16, Paliperidone = 1,  
10 Quetiapine = 4 and Risperidone = 5), it is possible that the improvement in cognitive  
11 performance observed in our sample may be a result of 2<sup>nd</sup> antipsychotic treatment effects,  
12 although 1<sup>st</sup> generation antipsychotic use could not be compared. However it has also been  
13 argued that improvements in cognitive performance over longitudinal designs may instead  
14 reflect practice effects (e.g. familiarity and procedural learning<sup>34</sup>), meaning that improvement  
15 in cognitive performance in our sample could also be attributable to practice effects between  
16 study visits. Lees et al<sup>35</sup> estimated the magnitude of these effects using both the MATRICS  
17 Consensus Cognitive Battery (MCCB)<sup>36</sup> and the Cog State Schizophrenia Battery<sup>37</sup>, finding  
18 strong test-retest correlations between repeated baseline visits across cognitive batteries, with  
19 potential learning effects in social-emotional cognition. However, the authors also observed  
20 that participants may have failed to complete the initial baseline assessment due to difficulty  
21 in understanding the task, with the suggestion that future investigations using either battery  
22 would benefit from adopting initial practice sessions to reduce practice effects. Therefore an  
23 initial practice session with the BACS may have reduced the size of improvement observed  
24 in cognitive performance from baseline performance.  
25  
26  
27  
28  
29  
30  
31  
32  
33  
34  
35  
36  
37  
38

39 Despite all of the sample being treated with 2<sup>nd</sup> generation antipsychotics, it is also  
40 possible that some anticholinergic effects, which differ between 2<sup>nd</sup> generation antipsychotic  
41 drugs<sup>38</sup>, may have affected cognitive performance. Long term exposure to antipsychotic  
42 medications of high anticholinergic activity have been previously reported to impact  
43 cognitive performance in patient samples<sup>39,40,41</sup>. Using low and high anticholinergic activity  
44 criteria from a recent review comparing medication effects (from Stroup & Gray<sup>42</sup>; refer to  
45 Table 1, pg. 342), our sample had 44% (N = 20) treated with a high anticholinergic  
46 antipsychotic, meaning that the absence of significant differences between groups may have  
47 been a result of heterogeneity in medication effects. Therefore, future investigations should  
48 consider the role of antipsychotic treatment effects on cognitive outcomes within  
49 schizophrenia.  
50  
51  
52  
53  
54  
55  
56  
57  
58  
59  
60

1  
2  
3 Trajectory analyses identified two clearly defined trajectories of treatment response,  
4 both of which are consistent across both timepoints: one trajectory showing good response,  
5 and one of little to no response (Figure 1). Confidence intervals (Figure 1) show some  
6 overlap between trajectories in the first ~20 days since baseline assessment, with these  
7 becoming independent following this period, meaning that separation between trajectory  
8 groups was apparent at around 3 weeks. This supports the findings from Samara et al<sup>6</sup> who  
9 found poor/minimal response to antipsychotic treatment at 2-weeks to be predictive of future  
10 treatment non-response. In previous investigations using first episode samples, 4 or more  
11 trajectories have been identified<sup>43,44</sup>. However, both these investigations used longer periods  
12 of follow-up as well as raw un-adjusted PANSS scores in their analyses: as the minimum raw  
13 score of the PANSS is 30, it is recommended to rescale the scores by subtracting 30 from  
14 total scores prior to producing percentages and ratios<sup>45</sup>. Therefore building trajectory models  
15 using raw scores may not be appropriate to use as ratio operations (e.g. calculating  
16 proportions) require a natural zero point<sup>45</sup>.

17  
18  
19  
20  
21  
22  
23  
24  
25  
26  
27  
28  
29 Growth curve models which were used to quantify change in cognitive performance  
30 between trajectory groups observed no significant changes in performance between visits. It  
31 is possible that this may be due to under sampled groups, as significant improvements for  
32 verbal memory, symbol coding, Tower of London and composite scores were observed in the  
33 whole sample. When comparing our findings to a >20% reduction in rescaled PANSS total  
34 scores criteria<sup>18,19</sup> there were no changes in the pattern of results to growth curve models or  
35 logistic regression outcomes. Using this criterion for treatment response resulted in a more  
36 even distribution of the total sample to groups (responder = 17 ; non-responder = 21),  
37 providing more power to comparative analyses. However despite this there was no change in  
38 the pattern of results, meaning that this criterion provided no added benefit to this analysis  
39 over trajectory-based groupings. The lack of significant difference in baseline cognition  
40 between those classified as treatment responders or non-responders after 6 weeks of  
41 treatment in our study contrasts previous research conducted which observed impaired  
42 cognitive performance in the poor response trajectory at week 4, with good performance at  
43 baseline being predictive of a good response trajectory at week 4<sup>44</sup>. Likewise, longitudinal  
44 research using the MCCB<sup>36</sup> with first-episode schizophrenia patients assessed at baseline and  
45 at a 12-week follow up identified tasks of executive function and planning and reasoning  
46 ability as potential indices of antipsychotic response<sup>46</sup>, with similar findings observed when  
47 cognitive performance is correlated with symptom severity measures<sup>47</sup>.



### *Limitations*

Previous investigations included sample sizes several magnitudes higher than in our study (Levine & Rabinowitz<sup>44</sup>; N = 491; Trampush et al<sup>26</sup>; N = 175) and it is likely that our sample size limited our ability to observe a significant relationship between cognitive performance and antipsychotic response. Using our sample's mean values for the BACS t composite score, a power calculation found that a total sample size of 31,304 samples would be required to detect a significant difference between trajectory groups at 90% power. When using the >20% PANSS reduction criteria this was N = 6,118, suggesting that both analyses were underpowered due to under sampling.

It is also possible that premorbid histories of the sample may have resulted in a less consistent picture of cognitive performance between groups. For example, prior cannabis use, particularly during adolescence, has been found to improve cognitive performance on the BACS in comparison to those who haven't ever used cannabis<sup>48</sup>. In this investigation comparing performance on the BACS between patients with a schizophrenia diagnosis with and without adolescent cannabis use (ACU), those with ACU reported significantly higher composite scores, as well significant improvement in working memory and verbal memory tasks (Hanna et al., 2016). In our sample, 68% (N = 30) had previous experience of using cannabis, with the majority of this use occurring between ages 12-19 (N = 23). Therefore, it is possible that premorbid histories may have also blurred the cognitive differences between groups.

### **Conclusions**

In this prospective cohort study, patients with a first episode diagnosis were assessed three times over a period of 6 weeks. Trajectory analyses using percentage change in PANSS total symptom scores identified two groups reflecting a good and poor response to antipsychotic medication. Baseline cognitive performance of these two groups did not predict response status at 6-weeks. This lack of discrimination between groups is likely due to underpowered analyses as a result of small sample sizes. Overall this suggests that brief cognitive batteries for schizophrenia may not be a useful predictor of response in the first two-years of illness onset.

### *Funding*

STRATA is funded by a grant from the Medical Research Council (MRC) to JHM, grant reference MR/L011794. EM's PhD is funded by the MRC-doctoral training partnership studentship in Biomedical Sciences at King's College London. J.H.M., E.K., A.E., O.D.H. are part funded by the National Institute for Health Research (NIHR) Biomedical Research Centre at South London and Maudsley NHS Foundation Trust and King's College London. The views expressed are those of the authors and not necessarily those of the NHS, the MRC, the NIHR or the Department of Health.

### *Competing interest*

The remaining authors report no conflicts of interest.

### *Acknowledgments*

For more information on STRATA please visit; <https://gtr.ukri.org/project/7F7F0378-8FD7-4A33-91AD-277A49EF4908>). STRATA was funded by a grant from the Medical Research Council (MRC) to Prof James MacCabe. Data were collected between June 2018 and December 2019. The remaining authors report no conflicts of interest.

### *Data availability*

At the time of submission, the data governance frameworks are being put in place to make a fully anonymized version of the data available to the wider research community via the TransSMART data sharing platform: <https://transmartfoundation.org/>. To apply for access to the data, please contact J.H.M. at [james.maccabe@kcl.ac.uk](mailto:james.maccabe@kcl.ac.uk).

### *Author contributions*

J.H.M., A.E., B.D., R.J.D., O.D.H., L.K., C.C., A.S., R.O., S.Le., J.L., S.La., S.K., and E.Mik contributed to the design and implementation of the study. E.O., E.M., R.P., N.R., K.G., C.C., S.E.S., and K.V.S. aided in data collection. E.M. completed analyses and wrote the manuscript with the assistance of J.H.M. K.G., N.R., J.H.M., A.E., E.K., R.J.D., A.S., C.C., B.D., provided comments on the manuscript.

## References

- 1 McGlashan TH, Johannessen, JO. Early detection and intervention with schizophrenia: rationale. *Schizophrenia bulletin* 1996;22(2),201-222.
- 2 Birchwood M, McGorry P, Jackson H. Early intervention in schizophrenia. *The British Journal of Psychiatry* 1997;170(1),2-5.
- 3 Bond GR, Drake RE, Luciano A. Employment and educational outcomes in early intervention programmes for early psychosis: a systematic review. *Epidemiology and psychiatric sciences* 2015; 24(5),446-457.
- 4 Bozzatello P, Bellino S, Rocca P. Predictive factors of treatment resistance in first episode of psychosis: A systematic review. *Frontiers in psychiatry* 2019;10, 67.
- 5 Carbon, M, Correll CU. Clinical predictors of therapeutic response to antipsychotics in schizophrenia. *Dialogues in clinical neuroscience* 2014;16(4), 505.
- 6 Samara, MT, Leucht C, Leeflang M, et al. Early improvement as a predictor of later response to antipsychotics in schizophrenia: a diagnostic test review. *American journal of psychiatry* 2015;172(7),617-629.
- 7 Griffiths K, Millgate E, Egerton A, et al. Demographic and clinical variables associated with response to clozapine in schizophrenia: a systematic review and meta-analysis. *Psychological Medicine* 2021;1-11.
- 8 Yoshimura B, Yada Y, So R, et al. The critical treatment window of clozapine in treatment-resistant schizophrenia: secondary analysis of an observational study. *Psychiatry research* 2017;250,65-70.
- 9 Reichenberg A, Caspi A, Harrington H, et al. Static and dynamic cognitive deficits in childhood preceding adult schizophrenia: a 30-year study. *American Journal of Psychiatry* 2010;167(2),160-169.
- 10 MacCabe JH, Wicks S, Löfving S, et al. Decline in cognitive performance between ages 13 and 18 years and the risk for psychosis in adulthood: a Swedish longitudinal cohort study in males. *Jama Psychiatry* 2013;70(3),261-270.
- 11 Green MF, Kern RS, Heaton RK. Longitudinal studies of cognition and functional outcome in schizophrenia: implications for MATRICS. *Schizophrenia research* 2004;72(1),41-51.
- 12 Carrión RE, Goldberg TE, McLaughlin D, et al. Impact of neurocognition on social and role functioning in individuals at clinical high risk for psychosis. *American Journal of Psychiatry* 2011;168(8),806-813.

- 1  
2  
3 13 Horan WP, Green MF, DeGroot M, et al. Social cognition in schizophrenia, part 2: 12-month  
4 stability and prediction of functional outcome in first-episode patients. *Schizophrenia bulletin*  
5 2012;38(4),865-872.  
6  
7  
8 14 Millgate E, Hide O, Lawrie SM, et al. Neuropsychological differences between treatment-  
9 resistant and treatment-responsive schizophrenia: a meta-analysis. *Psychological medicine*  
10 2022;52(1),1-13.  
11  
12  
13 15 Andreasen NC, Carpenter JrWT, Kane JM, et al. Remission in schizophrenia: proposed criteria  
14 and rationale for consensus. *American Journal of Psychiatry* 2005;162(3),441-449.  
15  
16  
17 16 Jones BL, Nagin DS. A note on a Stata plugin for estimating group-based trajectory  
18 models. *Sociological Methods & Research* 2013;42(4),608-613.  
19  
20  
21 17 Leucht S, Kissling W, Davis JM. The PANSS should be rescaled. *Schizophrenia bulletin*  
22 2010;36(3),461-462.  
23  
24 18 Leucht S, Kane JM, Kissling W, et al. What does the PANSS mean?. *Schizophrenia research*  
25 2005;79(2-3),231-238.  
26  
27  
28 19 Leucht S, Davis JM, Engel RR, et al. Definitions of response and remission in schizophrenia:  
29 recommendations for their use and their presentation. *Acta Psychiatrica Scandinavica*  
30 2009;119,7-14.  
31  
32  
33 20 Kemp R, Hayward P, Applewhaite G, et al. Compliance therapy in psychotic patients:  
34 randomised controlled trial. *Bmj* 1996;312(7027),345-349.  
35  
36  
37 21 Kemp R, Kirov G, Everitt B, et al. Randomised controlled trial of compliance therapy: 18-month  
38 follow-up. *The British Journal of Psychiatry* 1998;172(5),413-419.  
39  
40  
41 22 Sheehan DV, Lecrubier Y, Sheehan KH, et al. The Mini-International Neuropsychiatric Interview  
42 (MINI): the development and validation of a structured diagnostic psychiatric interview for  
43 DSM-IV and ICD-10. *The Journal of clinical psychiatry* 1998.  
44  
45  
46 23 Kay SR, Fiszbein A, Opler LA. The positive and negative syndrome scale (PANSS) for  
47 schizophrenia. *Schizophrenia bulletin* 1987;13(2),261-276.  
48  
49  
50 24 Guy W. ECDEU assessment manual for psychopharmacology. *US Department of Health,*  
51 *Education, and Welfare, Public Health Service, Alcohol, Drug Abuse, and Mental Health*  
52 *Administration, National Institute of Mental Health, Psychopharmacology Research Branch,*  
53 *Division of Extramural Research Programs* 1976.  
54  
55  
56 25 Keefe RS, Goldberg TE, Harvey PD, et al. The Brief Assessment of Cognition in Schizophrenia:  
57 reliability, sensitivity, and comparison with a standard neurocognitive battery. *Schizophrenia*  
58 *research* 2004;68(2-3),283-297.  
59  
60

- 1  
2  
3 26 Keefe RS, Harvey PD, Goldberg TE, et al. Norms and standardization of the Brief Assessment of  
4 Cognition in Schizophrenia (BACS). *Schizophrenia research* 2008;102(1-3),108-115.  
5  
6 27 StataCorp. Stata Statistical Software: Release 15. 2017. College Station, TX: StataCorp LLC.  
7  
8 28 StataCorp, LP. Stata multilevel mixed-effects reference manual. 2013. College Station, TX:  
9 StataCorp LP, 9(10).  
10  
11 29 Kapur S, Zipursky R, Jones C, et al. Relationship between dopamine D2 occupancy, clinical  
12 response, and side effects: a double-blind PET study of first-episode schizophrenia. *American*  
13 *Journal of Psychiatry* 2000;157(4),514-520.  
14  
15 30 Reilly JL, Harris MS, Keshavan MS, et al. Adverse effects of risperidone on spatial working  
16 memory in first-episode schizophrenia. *Archives of general psychiatry* 2006;63(11),1189-  
17 1197.  
18  
19 31 Hill SK, Bishop JR, Palumbo D, et al. Effect of second-generation antipsychotics on cognition:  
20 current issues and future challenges. *Expert review of neurotherapeutics* 2010;10(1),43-57.  
21  
22 32 Kane J, Honigfeld G, Singer J, et al. Clozapine for the treatment-resistant schizophrenic: a  
23 double-blind comparison with chlorpromazine. *Archives of general psychiatry*  
24 1988;45(9),789-796.  
25  
26 33 Guilera G, Pino O, Gómez-Benito J, et al. Antipsychotic effects on cognition in schizophrenia: a  
27 meta-analysis of randomised controlled trials. *The European Journal of Psychiatry*  
28 2009;23(2),77-89.  
29  
30 34 Goldberg TE, Goldman RS, Burdick KE, et al. Cognitive improvement after treatment with  
31 second-generation antipsychotic medications in first-episode schizophrenia: is it a practice  
32 effect?. *Archives of general psychiatry* 2007;64(10),1115-1122.  
33  
34 35 Lees J, Applegate E, Emsley R, et al. Calibration and cross-validation of MCCB and CogState in  
35 schizophrenia. *Psychopharmacology* 2015;232(21),3873-3882.  
36  
37 36 Nuechterlein KH, Green MF, Kern RS, et al. The MATRICS Consensus Cognitive Battery, part  
38 1: test selection, reliability, and validity. *American Journal of Psychiatry* 2008;165(2),203-  
39 213.  
40  
41 37 Maruff P, Thomas E, Cysique L, et al. Validity of the CogState brief battery: relationship to  
42 standardized tests and sensitivity to cognitive impairment in mild traumatic brain injury,  
43 schizophrenia, and AIDS dementia complex. *Archives of Clinical Neuropsychology*  
44 2009;24(2),165-178.  
45  
46 38 Lieberman JA. Managing anticholinergic side effects. *Primary care companion to the Journal of*  
47 *clinical psychiatry* 2004;6(suppl2),20.  
48  
49  
50  
51  
52  
53  
54  
55  
56  
57  
58  
59  
60

- 1  
2  
3 39 Strauss ME, Reynolds KS, Jayaram G, et al. Effects of anticholinergic medication on memory in  
4 schizophrenia. *Schizophrenia Research* 1990;3(2),127-129.  
5  
6 40 Campbell N, Boustani M, Limbil T, et al. The cognitive impact of anticholinergics: a clinical  
7 review. *Clinical interventions in aging* 2009;4,225.  
8  
9 41 Joshi YB, Thomas ML, Braff DL, et al. Anticholinergic Medication Burden–Associated  
10 Cognitive Impairment in Schizophrenia. *American Journal of Psychiatry* 2021;appi-ajp.  
11  
12 42 Stroup TS, Gray N. Management of common adverse effects of antipsychotic medications. *World*  
13 *Psychiatry* 2018;17(3),341-356.  
14  
15 43 Abdin E, Chong SA, Vaingankar JA, et al. Trajectories of positive, negative and general  
16 psychopathology symptoms in first episode psychosis and their relationship with functioning  
17 over a 2-year follow-up period. *PloS one* 2017;12(11),e0187141.  
18  
19 44 Levine SZ, Rabinowitz J. Trajectories and antecedents of treatment response over time in early-  
20 episode psychosis. *Schizophrenia bulletin* 2010;36(3),624-632.  
21  
22 45 Obermeier M, Mayr A, Schennach-Wolff R, et al. Should the PANSS be rescaled?. *Schizophrenia*  
23 *bulletin* 2010;36(3),455-460.  
24  
25 46 Trampush JW, Lencz T, DeRosse P, et al. Relationship of cognition to clinical response in first-  
26 episode schizophrenia spectrum disorders. *Schizophrenia bulletin* 2015;41(6),1237-1247.  
27  
28 47 Bilder RM, Goldman RS, Robinson D, et al. Neuropsychology of first-episode schizophrenia:  
29 initial characterization and clinical correlates. *American Journal of Psychiatry*  
30 2000;157(4),549-559.  
31  
32 48 Hanna RC, Shalvoy A, Cullum CM, et al. Cognitive function in individuals with psychosis:  
33 moderation by adolescent cannabis use. *Schizophrenia bulletin* 2016;42(6),1496-1503.  
34  
35  
36  
37  
38  
39  
40  
41  
42  
43  
44  
45  
46  
47  
48  
49  
50  
51  
52  
53  
54  
55  
56  
57  
58  
59  
60

### Figure legend

*Figure 1.* Trajectory model of total PANSS score percentage change from baseline modelled over days since baseline assessment. The dotted linear trajectory reflects treatment non-responders and the complete line treatment responders. The grey dotted lines around each trajectory reflect the confidence intervals for trajectory each group. Percentages reflect the estimated amount of the sampled population included in each trajectory.

For peer review only

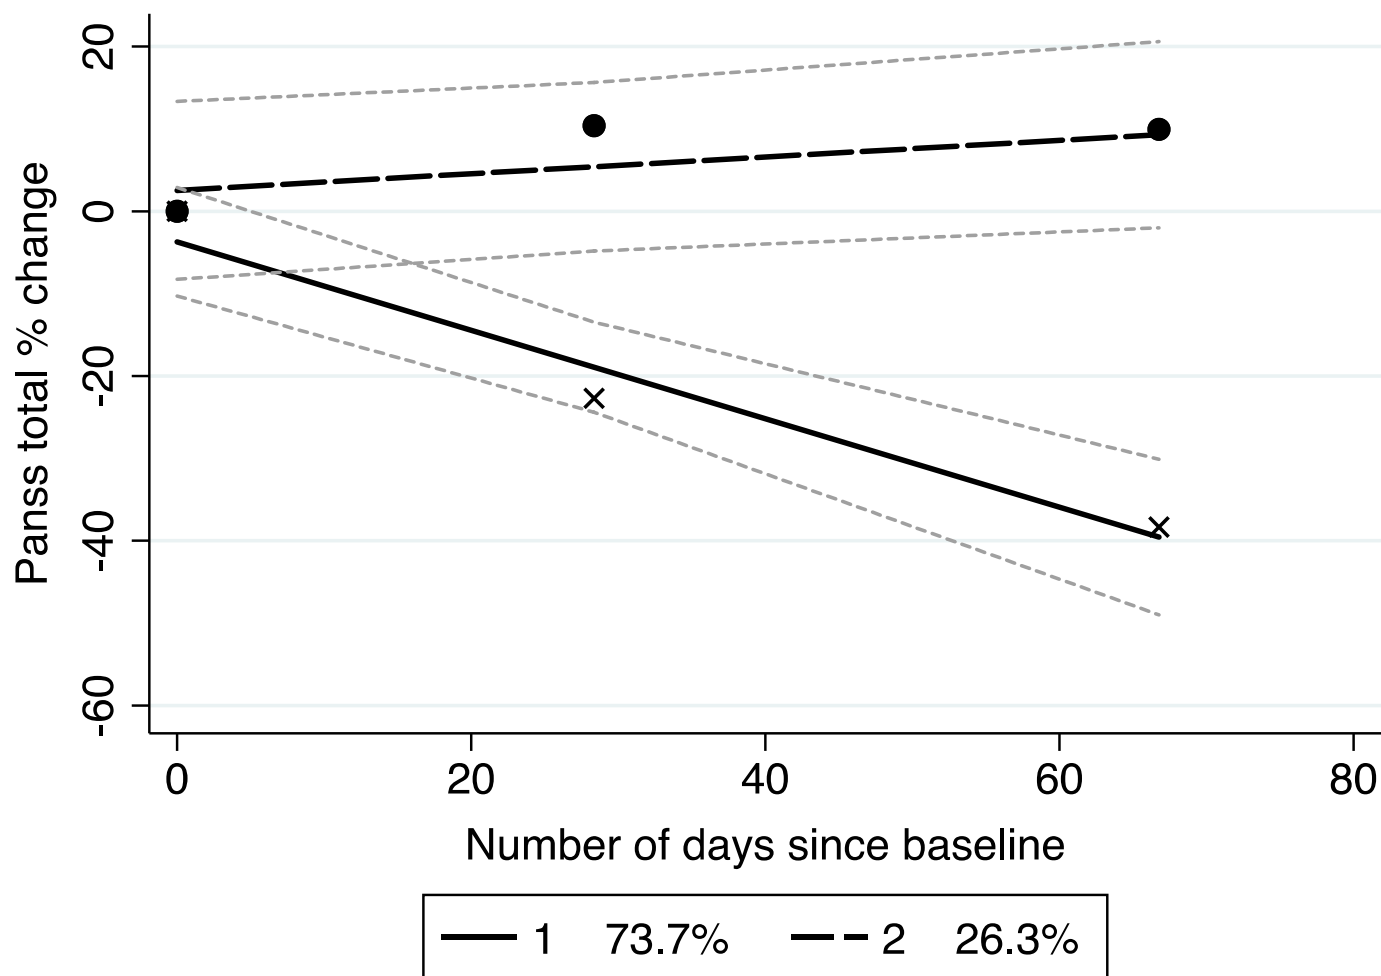



1  
2  
3 **Supplementary material**  
4

5 Table S.1

6 *Descriptive statistics of clinical and demographic variables for each trajectory group at baseline assessments*  
7

| Variable                                                                                           | Non-responder |        |        | Responder |        |        |
|----------------------------------------------------------------------------------------------------|---------------|--------|--------|-----------|--------|--------|
|                                                                                                    | N             | M      | SD     | N         | M      | SD     |
| Age (at consent)                                                                                   | 6             | 29.57  | 6.70   | 39        | 26.90  | 8.41   |
| Gender ( <i>male</i> )                                                                             | 6             | -      | -      | 27        | -      | -      |
| Gender ( <i>female</i> )                                                                           | 1             | -      | -      | 12        | -      | -      |
| Age of illness onset (years)                                                                       | 7             | 27.54  | 8.09   | 39        | 26.34  | 8.60   |
| Duration from 1 <sup>st</sup> Psychotic symptom (days) to baseline antipsychotic (DUP)             | 7             | 177.09 | 207.93 | 39        | 261.08 | 251.38 |
| Duration from 1 <sup>st</sup> contact with mental health services (days) to baseline antipsychotic | 7             | 461.89 | 801.88 | 39        | 325.88 | 567.82 |
| Chlorpromazine equivalents (mg/day)                                                                | 7             | 271.43 | 249.76 | 39        | 159.92 | 75.02  |
| Number of hospitalisations                                                                         | 7             | 100    | 1.00   | 39        | 0.87   | 0.57   |
| Years of education                                                                                 | 6             | 17.00  | 2.53   | 36        | 13.06  | 2.47   |
| PANSS positive                                                                                     | 7             | 11.14  | 6.67   | 38        | 12.08  | 4.44   |
| PANSS negative                                                                                     | 7             | 12.57  | 5.77   | 38        | 9.95   | 7.04   |
| PANSS general                                                                                      | 7             | 19.57  | 8.70   | 38        | 19.37  | 8.66   |
| PANSS total                                                                                        | 7             | 43.29  | 13.52  | 38        | 41.39  | 16.68  |

38  
39 *Note.* PANSS = Positive and Negative Symptom Scale.  
40  
41  
42

Table S.2

Results from univariable and multivariable logistic regression models for response status using PANSS total >20% reduction criteria and baseline BACS performance

| BACS task         | Unadjusted |      |              |      |         | Adjusted for age, gender and DUP |      |              |      |         |
|-------------------|------------|------|--------------|------|---------|----------------------------------|------|--------------|------|---------|
|                   | $\beta$    | SE   | 95%CI        | OR   | P-value | $\beta$                          | SE   | 95%CI        | OR   | P-value |
| Verbal Memory     | -0.01      | 0.03 | -0.07 ; 0.06 | 0.99 | .819    | <-0.01                           | 0.04 | -0.08 ; 0.07 | 1.00 | .920    |
| Digit Sequencing  | -0.10      | 0.10 | -0.29 ; 0.09 | 0.90 | .297    | -0.06                            | 0.11 | -0.27 ; 0.16 | 0.95 | .604    |
| Verbal Fluency    | 0.04       | 0.05 | -0.06 ; 0.14 | 1.04 | .403    | 0.07                             | 0.06 | -0.05 ; 0.18 | 1.07 | .259    |
| Token Motor       | 0.03       | 0.04 | -0.04 ; 0.10 | 1.03 | .432    | 0.06                             | 0.05 | -0.03 ; 0.15 | 1.06 | .218    |
| Symbol Coding     | -0.04      | 0.03 | -0.11 ; 0.02 | 0.96 | .206    | -0.05                            | 0.04 | -0.12 ; 0.03 | 0.96 | .237    |
| Tower of London   | 0.07       | 0.09 | -0.11 ; 0.24 | 1.07 | .445    | 0.07                             | 0.09 | -0.12 ; 0.25 | 1.07 | .465    |
| t score composite | <0.01      | 0.03 | -0.06 ; 0.07 | 1.00 | .924    | 0.01                             | 0.03 | -0.06 ; 0.07 | 1.00 | .892    |
| z score composite | 0.02       | 0.33 | -0.63 ; 0.66 | 1.02 | .960    | 0.03                             | 0.34 | -0.63 ; 0.69 | 1.03 | .931    |

Note. BACS = Brief Assessment of Cognition in Schizophrenia; DUP = duration of untreated psychosis; CIs = confidence intervals

Table S.3

Results from unadjusted and adjusted growth curve models comparing trajectory groups on BACS performance across all visits

| BACS task         | Unadjusted |       |                |         | Adjusted for age, gender and DUP |      |               |         |
|-------------------|------------|-------|----------------|---------|----------------------------------|------|---------------|---------|
|                   | $\beta$    | SE    | 95%CI          | P-value | $\beta$                          | SE   | 95%CI         | P-value |
| Verbal Memory     | -2.15      | 45.79 | -13.49 ; 9.19  | .710    | -2.67                            | 5.88 | -14.20 ; 8.86 | .650    |
| Digit Sequencing  | -2.25      | 1.63  | -5.45 ; 1.095  | .167    | -2.03                            | 1.62 | -5.19 ; 1.14  | .210    |
| Verbal Fluency    | -0.90      | 3.29  | -7.36 ; 5.55   | .784    | -1.31                            | 2.99 | -7.17 ; 4.54  | .660    |
| Token Motor       | -2.00      | 6.39  | -14.52 ; 10.53 | .755    | -0.45                            | 5.89 | 11.99 ; 11.10 | .939    |
| Symbol Coding     | -3.81      | 5.56  | -14.71 ; 7.08  | .493    | -4.25                            | 5.42 | -14.87 ; 6.37 | .433    |
| Tower of London   | 0.18       | 1.56  | -2.87 ; 3.24   | .906    | 0.17                             | 1.57 | -2.90 ; 3.25  | .912    |
| t score composite | -2.49      | 5.70  | -13.66 ; 8.68  | .662    | -2.43                            | 5.78 | -13.76 ; 8.89 | .674    |
| z score composite | -0.25      | 0.57  | -1.37 ; 0.87   | .658    | -0.25                            | 0.58 | -1.38 ; 0.88  | .665    |

Note. BACS = Brief Assessment of Cognition in Schizophrenia; DUP = duration of untreated psychosis; CIs = confidence intervals

Table S.4

Results from unadjusted and adjusted growth curve models comparing PANSS >20% reduction groups on BACS performance across all visits

| BACS task         | Unadjusted |      |               |         | Adjusted for age, gender and DUP |      |               |         |
|-------------------|------------|------|---------------|---------|----------------------------------|------|---------------|---------|
|                   | $\beta$    | SE   | 95%CI         | P-value | $\beta$                          | SE   | 95%CI         | P-value |
| Verbal Memory     | -4.18      | 4.21 | -12.44 ; 4.08 | .321    | 3.27                             | 4.34 | -11.78 ; 5.23 | .451    |
| Digit Sequencing  | -2.36      | 1.35 | -5.01 ; 0.29  | .081    | -1.78                            | 1.34 | -4.41 ; 0.86  | .186    |
| Verbal Fluency    | -0.97      | 2.55 | -5.97 ; 4.02  | .703    | -0.54                            | 2.49 | -5.42 ; 4.35  | .830    |
| Token Motor       | 1.81       | 5.52 | -9.01 ; 12.62 | .744    | 5.60                             | 5.07 | -4.33 ; 15.53 | .269    |
| Symbol Coding     | -4.23      | 3.92 | -11.92 ; 3.46 | .281    | -4.13                            | 4.03 | -12.03 ; 3.78 | .306    |
| Tower of London   | -0.77      | 1.25 | -3.22 ; 1.68  | .538    | -0.56                            | 1.30 | -3.10 ; 1.98  | .667    |
| t score composite | -2.39      | 4.75 | -11.71 ; 6.93 | .615    | -1.56                            | 4.84 | -11.03 ; 7.92 | .747    |
| z score composite | -0.25      | 0.48 | -1.18 ; 0.68  | .600    | -0.17                            | 0.48 | -1.12 ; 0.78  | .728    |

Note. BACS = Brief Assessment of Cognition in Schizophrenia; DUP = duration of untreated psychosis; CIs = confidence intervals

1  
2  
3  
4  
5  
6  
7  
8  
9  
10  
11  
12  
13  
14  
15  
16  
17  
18  
19  
20  
21  
22  
23  
24  
25  
26  
27  
28  
29  
30  
31  
32  
33  
34  
35  
36  
37  
38  
39  
40  
41  
42  
43  
44  
45  
46

Table S.5  
*Baseline cognitive performance for both groups using >20% PANSS reduction criteria*

| BACS measure     | N  | Non-responder |       | Responder |       |       |
|------------------|----|---------------|-------|-----------|-------|-------|
|                  |    | Mean          | SD    | N         | Mean  | SD    |
| Verbal Memory    | 13 | 37.54         | 8.27  | 20        | 36.65 | 12.73 |
| Digit Sequencing | 12 | 19.25         | 4.20  | 19        | 17.68 | 3.97  |
| Verbal Fluency   | 14 | 27.36         | 6.44  | 20        | 29.45 | 7.75  |
| Token Motor      | 13 | 63.23         | 10.94 | 18        | 66.39 | 11.24 |
| Symbol Coding    | 12 | 44.83         | 9.47  | 20        | 39.35 | 12.75 |
| Tower of London  | 12 | 14.17         | 5.11  | 17        | 15.41 | 3.79  |
| tscore composite | 10 | 26.30         | 13.35 | 17        | 26.77 | 12.28 |
| zscore composite | 10 | -2.36         | 1.31  | 17        | -2.34 | 1.22  |

*Note.* BACS = Brief Assessment of Cognition in Schizophrenia; PANSS = Positive and Negative Symptom Scale.

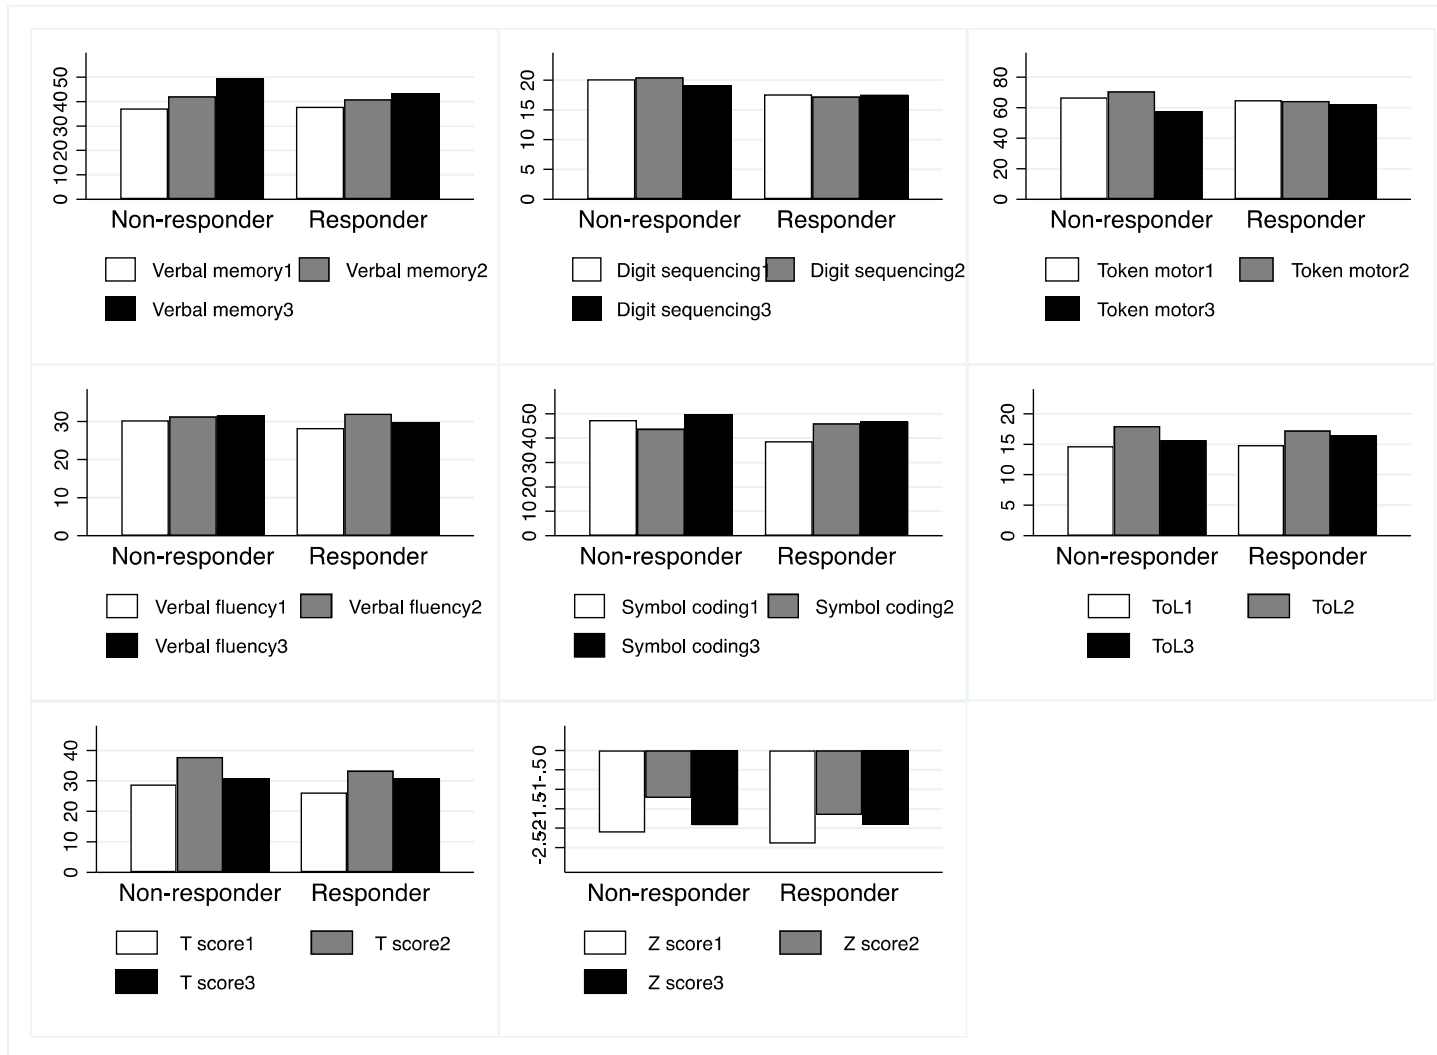

Figure S.1

Bar graphs comparing mean performance on BACS measures between trajectory groups (non-responder vs. responder) at each visit (*white* = baseline, *grey* = 2-week, *black* = 6-week)

Note. BACS = Brief Assessment of Cognition in Schizophrenia; ToL = Tower of London.

1  
2  
3  
4  
5  
6  
7  
8  
9  
10  
11  
12  
13  
14  
15  
16  
17  
18  
19  
20  
21  
22  
23  
24  
25  
26  
27  
28  
29  
30  
31  
32  
33  
34  
35  
36  
37  
38  
39  
40  
41  
42  
43  
44  
45  
46

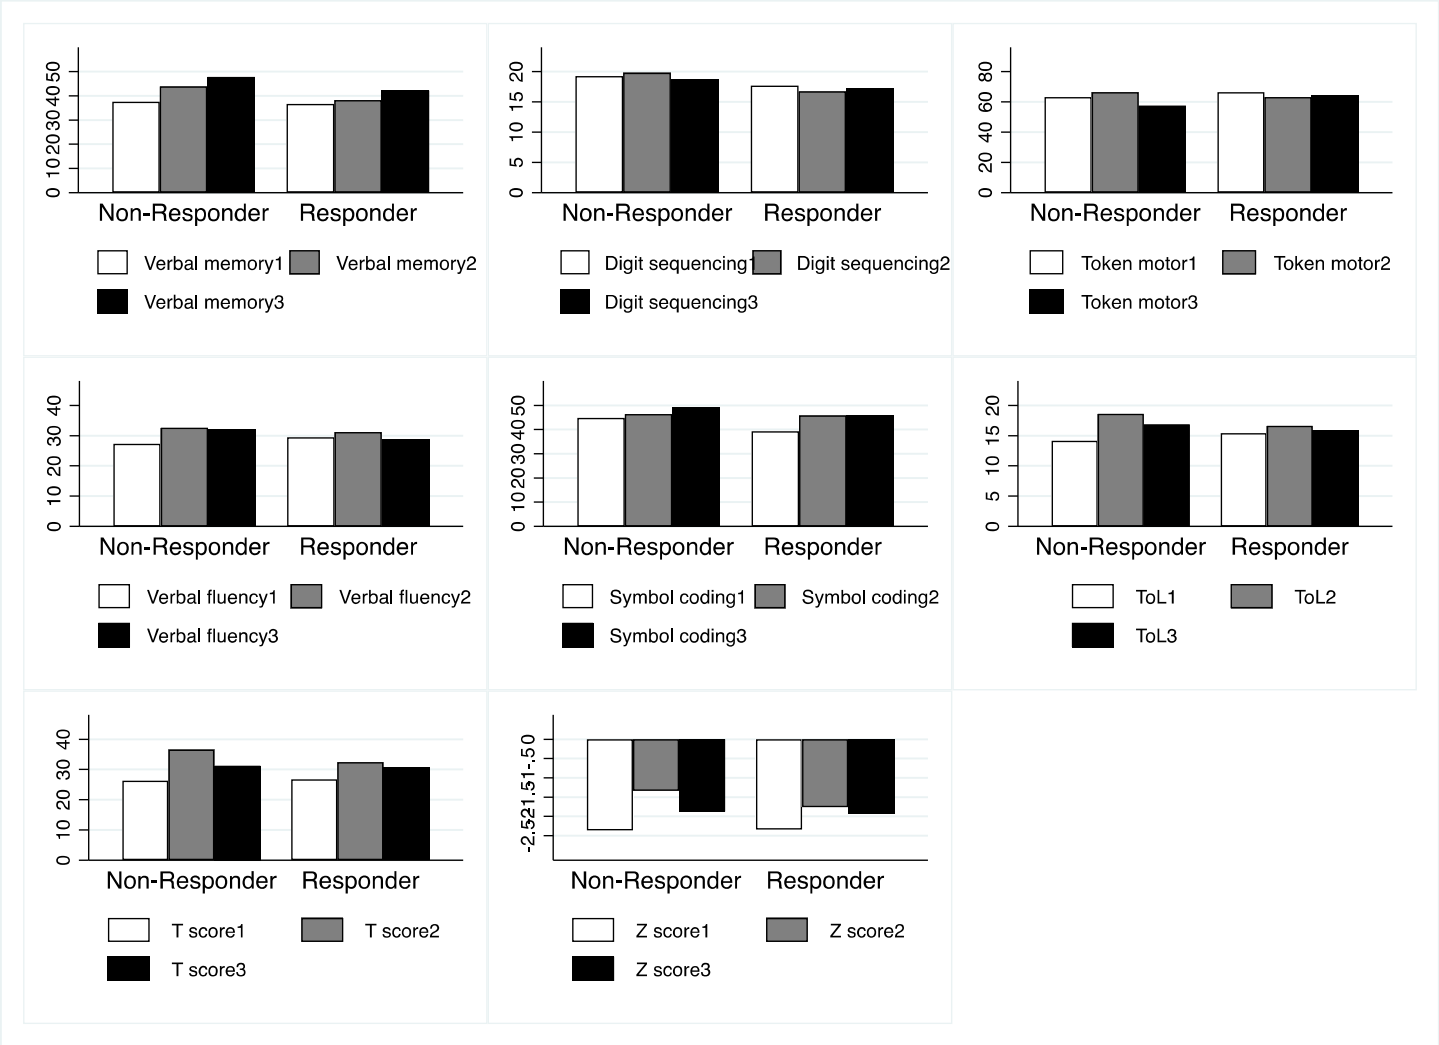

Figure S.2  
 Bar graphs comparing mean performance on BACS measures using >20% PANSS reduction criteria (non-responder vs. responder) at each visit (white = baseline, grey = 2-week, black = 6-week)  
 Note. BACS = Brief Assessment of Cognition in Schizophrenia; ToL = Tower of London.

## STROBE Statement—checklist of items that should be included in reports of observational studies

|                           | Item No | Recommendation                                                                                                                                                                             | Noted on pg. |
|---------------------------|---------|--------------------------------------------------------------------------------------------------------------------------------------------------------------------------------------------|--------------|
| <b>Title and abstract</b> | 1       | (a) Indicate the study's design with a commonly used term in the title or the abstract                                                                                                     | 1,2,3        |
|                           |         | (b) Provide in the abstract an informative and balanced summary of what was done and what was found                                                                                        | 1,2,3        |
| <b>Introduction</b>       |         |                                                                                                                                                                                            |              |
| Background/rationale      | 2       | Explain the scientific background and rationale for the investigation being reported                                                                                                       | 5            |
| Objectives                | 3       | State specific objectives, including any prespecified hypotheses                                                                                                                           | 5            |
| <b>Methods</b>            |         |                                                                                                                                                                                            |              |
| Study design              | 4       | Present key elements of study design early in the paper                                                                                                                                    | 6            |
| Setting                   | 5       | Describe the setting, locations, and relevant dates, including periods of recruitment, exposure, follow-up, and data collection                                                            | 6            |
| Participants              | 6       | (a) <i>Cohort study</i> —Give the eligibility criteria, and the sources and methods of selection of participants. Describe methods of follow-up                                            | 6,7          |
|                           |         | <i>Case-control study</i> —Give the eligibility criteria, and the sources and methods of case ascertainment and control selection. Give the rationale for the choice of cases and controls |              |
|                           |         | <i>Cross-sectional study</i> —Give the eligibility criteria, and the sources and methods of selection of participants                                                                      |              |
|                           |         | (b) <i>Cohort study</i> —For matched studies, give matching criteria and number of exposed and unexposed                                                                                   | N/A          |
|                           |         | <i>Case-control study</i> —For matched studies, give matching criteria and the number of controls per case                                                                                 |              |
|                           |         |                                                                                                                                                                                            |              |
| Variables                 | 7       | Clearly define all outcomes, exposures, predictors, potential confounders, and effect modifiers. Give diagnostic criteria, if applicable                                                   | 7,8          |
| Data sources/measurement  | 8*      | For each variable of interest, give sources of data and details of methods of assessment (measurement). Describe comparability of assessment methods if there is more than one group       | 7,8          |
| Bias                      | 9       | Describe any efforts to address potential sources of bias                                                                                                                                  | 9            |
| Study size                | 10      | Explain how the study size was arrived at                                                                                                                                                  | N/A          |
| Quantitative variables    | 11      | Explain how quantitative variables were handled in the analyses. If applicable, describe which groupings were chosen and why                                                               | 8,9          |
| Statistical methods       | 12      | (a) Describe all statistical methods, including those used to control for confounding                                                                                                      | 8,9          |
|                           |         | (b) Describe any methods used to examine subgroups and interactions                                                                                                                        | 8,9          |
|                           |         | (c) Explain how missing data were addressed                                                                                                                                                | N/A          |
|                           |         | (d) <i>Cohort study</i> —If applicable, explain how loss to follow-up was addressed                                                                                                        | N/A          |
|                           |         | <i>Case-control study</i> —If applicable, explain how matching of cases and controls was addressed                                                                                         |              |
|                           |         | <i>Cross-sectional study</i> —If applicable, describe analytical methods taking account of sampling strategy                                                                               |              |
|                           |         | (e) Describe any sensitivity analyses                                                                                                                                                      | 8,9          |



1  
2  
3  
4  
5  
6  
7  
8  
9  
10  
11  
12  
13  
14  
15  
16  
17  
18  
19  
20  
21  
22  
23  
24  
25  
26  
27  
28  
29  
30  
31  
32  
33  
34  
35  
36  
37  
38  
39  
40  
41  
42  
43  
44  
45  
46  
47  
48  
49  
50  
51  
52  
53  
54  
55  
56  
57  
58  
59  
60

Continued on next page

For peer review only

| <b>Results</b>           |     |                                                                                                                                                                                                              |                    |
|--------------------------|-----|--------------------------------------------------------------------------------------------------------------------------------------------------------------------------------------------------------------|--------------------|
| Participants             | 13* | (a) Report numbers of individuals at each stage of study—eg numbers potentially eligible, examined for eligibility, confirmed eligible, included in the study, completing follow-up, and analysed            | 6,7                |
|                          |     | (b) Give reasons for non-participation at each stage                                                                                                                                                         | 7                  |
|                          |     | (c) Consider use of a flow diagram                                                                                                                                                                           | N/A                |
| Descriptive data         | 14* | (a) Give characteristics of study participants (eg demographic, clinical, social) and information on exposures and potential confounders                                                                     | 9,10               |
|                          |     | (b) Indicate number of participants with missing data for each variable of interest                                                                                                                          | N/A                |
|                          |     | (c) <i>Cohort study</i> —Summarise follow-up time (eg, average and total amount)                                                                                                                             | N/A                |
| Outcome data             | 15* | <i>Cohort study</i> —Report numbers of outcome events or summary measures over time                                                                                                                          | 11, supplement.    |
|                          |     | <i>Case-control study</i> —Report numbers in each exposure category, or summary measures of exposure                                                                                                         | N/A                |
|                          |     | <i>Cross-sectional study</i> —Report numbers of outcome events or summary measures                                                                                                                           | N/A                |
| Main results             | 16  | (a) Give unadjusted estimates and, if applicable, confounder-adjusted estimates and their precision (eg, 95% confidence interval). Make clear which confounders were adjusted for and why they were included | 17, supplement.    |
|                          |     | (b) Report category boundaries when continuous variables were categorized                                                                                                                                    | N/A                |
|                          |     | (c) If relevant, consider translating estimates of relative risk into absolute risk for a meaningful time period                                                                                             | 17, supplement.    |
| Other analyses           | 17  | Report other analyses done—eg analyses of subgroups and interactions, and sensitivity analyses                                                                                                               | 13-15, Supplement. |
| <b>Discussion</b>        |     |                                                                                                                                                                                                              |                    |
| Key results              | 18  | Summarise key results with reference to study objectives                                                                                                                                                     | 18,19              |
| Limitations              | 19  | Discuss limitations of the study, taking into account sources of potential bias or imprecision. Discuss both direction and magnitude of any potential bias                                                   | 21,22              |
| Interpretation           | 20  | Give a cautious overall interpretation of results considering objectives, limitations, multiplicity of analyses, results from similar studies, and other relevant evidence                                   | 20,21              |
| Generalisability         | 21  | Discuss the generalisability (external validity) of the study results                                                                                                                                        | 20,21              |
| <b>Other information</b> |     |                                                                                                                                                                                                              |                    |
| Funding                  | 22  | Give the source of funding and the role of the funders for the present study and, if applicable, for the original study on which the present article is based                                                | 22                 |

\*Give information separately for cases and controls in case-control studies and, if applicable, for exposed and unexposed groups in cohort and cross-sectional studies.

**Note:** An Explanation and Elaboration article discusses each checklist item and gives methodological background and published examples of transparent reporting. The STROBE checklist is best used in conjunction with this article (freely available on the Web sites of PLoS Medicine at <http://www.plosmedicine.org/>, Annals of Internal Medicine at <http://www.annals.org/>, and Epidemiology at <http://www.epidem.com/>). Information on the STROBE Initiative is available at [www.strobe-statement.org](http://www.strobe-statement.org).

# BMJ Open

## Cognitive function and treatment response trajectories in first episode schizophrenia: evidence from a prospective cohort study.

|                               |                                                                                                                                                                                                                                                                                                                                                                                                                                                                                                                                                                                                                                                                                                                                                                                                                                                                                                                                                                                                                                                                                                                                                                                                                                                                                                                                                                                                                                                                                                                                                                                                                                                                                                                                                                                                                                                                                                                                                                                                                                                                                                                                                                                                                                                                                                                                                                                                   |
|-------------------------------|---------------------------------------------------------------------------------------------------------------------------------------------------------------------------------------------------------------------------------------------------------------------------------------------------------------------------------------------------------------------------------------------------------------------------------------------------------------------------------------------------------------------------------------------------------------------------------------------------------------------------------------------------------------------------------------------------------------------------------------------------------------------------------------------------------------------------------------------------------------------------------------------------------------------------------------------------------------------------------------------------------------------------------------------------------------------------------------------------------------------------------------------------------------------------------------------------------------------------------------------------------------------------------------------------------------------------------------------------------------------------------------------------------------------------------------------------------------------------------------------------------------------------------------------------------------------------------------------------------------------------------------------------------------------------------------------------------------------------------------------------------------------------------------------------------------------------------------------------------------------------------------------------------------------------------------------------------------------------------------------------------------------------------------------------------------------------------------------------------------------------------------------------------------------------------------------------------------------------------------------------------------------------------------------------------------------------------------------------------------------------------------------------|
| Journal:                      | <i>BMJ Open</i>                                                                                                                                                                                                                                                                                                                                                                                                                                                                                                                                                                                                                                                                                                                                                                                                                                                                                                                                                                                                                                                                                                                                                                                                                                                                                                                                                                                                                                                                                                                                                                                                                                                                                                                                                                                                                                                                                                                                                                                                                                                                                                                                                                                                                                                                                                                                                                                   |
| Manuscript ID                 | bmjopen-2022-062570.R1                                                                                                                                                                                                                                                                                                                                                                                                                                                                                                                                                                                                                                                                                                                                                                                                                                                                                                                                                                                                                                                                                                                                                                                                                                                                                                                                                                                                                                                                                                                                                                                                                                                                                                                                                                                                                                                                                                                                                                                                                                                                                                                                                                                                                                                                                                                                                                            |
| Article Type:                 | Original research                                                                                                                                                                                                                                                                                                                                                                                                                                                                                                                                                                                                                                                                                                                                                                                                                                                                                                                                                                                                                                                                                                                                                                                                                                                                                                                                                                                                                                                                                                                                                                                                                                                                                                                                                                                                                                                                                                                                                                                                                                                                                                                                                                                                                                                                                                                                                                                 |
| Date Submitted by the Author: | 29-Jul-2022                                                                                                                                                                                                                                                                                                                                                                                                                                                                                                                                                                                                                                                                                                                                                                                                                                                                                                                                                                                                                                                                                                                                                                                                                                                                                                                                                                                                                                                                                                                                                                                                                                                                                                                                                                                                                                                                                                                                                                                                                                                                                                                                                                                                                                                                                                                                                                                       |
| Complete List of Authors:     | <p>Millgate, Edward; King's College London Institute of Psychiatry Psychology and Neuroscience, Department of Psychosis Studies<br/> Griffiths, Kira; King's College London Institute of Psychiatry Psychology and Neuroscience, Department of Psychosis Studies<br/> Egerton, Alice; King's College London Institute of Psychiatry Psychology and Neuroscience, Department of Psychosis Studies; South London and Maudsley NHS Foundation Trust, NIHR Biomedical Research Centre<br/> Kravariti, Eugenia; King's College London Institute of Psychiatry Psychology and Neuroscience, Department of Psychosis Studies; South London and Maudsley NHS Foundation Trust, NIHR Biomedical Research Centre<br/> Casetta, Cecilia; King's College London Institute of Psychiatry Psychology and Neuroscience, Department of Psychosis Studies; South London and Maudsley Mental Health NHS Trust, National Psychosis Service<br/> Deakin, Bill; University of Manchester, Faculty of Medicine, Biology and Health<br/> Drake, Richard; University of Manchester, Division of Psychology &amp; Mental Health; Greater Manchester Mental Health NHS Foundation Trust<br/> Howes, Oliver; King's College London Institute of Psychiatry Psychology and Neuroscience, Department of Psychosis Studies; South London and Maudsley NHS Foundation Trust, NIHR Biomedical Research Centre<br/> Kassoumeri, Laura; King's College London Institute of Psychiatry Psychology and Neuroscience, Department of Psychosis Studies<br/> Khan , Sobia; University of Manchester, Faculty of Medicine, Biology and Health<br/> Lankshear, Steve; Greater Manchester Mental Health NHS Foundation Trust<br/> Lees, Jane; Greater Manchester Mental Health NHS Foundation Trust; University of Manchester, Faculty of Medicine, Biology and Health<br/> Lewis, Shon; University of Manchester; Greater Manchester Mental Health NHS Foundation Trust<br/> Mikulskaya, Elena ; University of Manchester, Faculty of Medicine, Biology and Health<br/> Oloyede, Ebenezer; King's College London Institute of Psychiatry Psychology and Neuroscience, Department of Psychosis Studies; South London and Maudsley NHS Foundation Trust, Pharmacy Department<br/> Owens, Rebecca; University of Manchester, Faculty of Medicine, Biology and Health<br/> Pollard, Rebecca; King's College London Institute of Psychiatry</p> |

|                                                        |                                                                                                                                                                                                                                                                                                                                                                                                                                                                                                                                                                                                                                                                                                                                                                                                                                           |
|--------------------------------------------------------|-------------------------------------------------------------------------------------------------------------------------------------------------------------------------------------------------------------------------------------------------------------------------------------------------------------------------------------------------------------------------------------------------------------------------------------------------------------------------------------------------------------------------------------------------------------------------------------------------------------------------------------------------------------------------------------------------------------------------------------------------------------------------------------------------------------------------------------------|
|                                                        | Psychology and Neuroscience, Department of Psychosis Studies<br>Rich, Nathalie; University College London, Department of Epidemiology &<br>Applied Clinical Research<br>Smart, Sophie; Cardiff University, Division of Psychological Medicine and<br>Clinical Neurosciences<br>Segev , Aviv; King's College London Institute of Psychiatry Psychology<br>and Neuroscience, Department of Psychosis Studies; Shalvata Mental<br>Health Center, Sackler Faculty of Medicine<br>Verena Sendt , Kyra; King's College London Institute of Psychiatry<br>Psychology and Neuroscience, Department of Psychosis Studies<br>MacCabe, James; Institute of Psychiatry Psychology and Neuroscience<br>Division of Academic Psychiatry, Department of Psychosis Studies; South<br>London and Maudsley NHS Foundation Trust, National Psychosis Service |
| <b>&lt;b&gt;Primary Subject<br/>Heading&lt;/b&gt;:</b> | Mental health                                                                                                                                                                                                                                                                                                                                                                                                                                                                                                                                                                                                                                                                                                                                                                                                                             |
| <b>Secondary Subject Heading:</b>                      | Public health, Patient-centred medicine, Mental health                                                                                                                                                                                                                                                                                                                                                                                                                                                                                                                                                                                                                                                                                                                                                                                    |
| <b>Keywords:</b>                                       | Schizophrenia & psychotic disorders < PSYCHIATRY, Adult psychiatry <<br>PSYCHIATRY, MENTAL HEALTH                                                                                                                                                                                                                                                                                                                                                                                                                                                                                                                                                                                                                                                                                                                                         |
|                                                        |                                                                                                                                                                                                                                                                                                                                                                                                                                                                                                                                                                                                                                                                                                                                                                                                                                           |

SCHOLARONE™  
Manuscripts



I, the Submitting Author has the right to grant and does grant on behalf of all authors of the Work (as defined in the below author licence), an exclusive licence and/or a non-exclusive licence for contributions from authors who are: i) UK Crown employees; ii) where BMJ has agreed a CC-BY licence shall apply, and/or iii) in accordance with the terms applicable for US Federal Government officers or employees acting as part of their official duties; on a worldwide, perpetual, irrevocable, royalty-free basis to BMJ Publishing Group Ltd ("BMJ") its licensees and where the relevant Journal is co-owned by BMJ to the co-owners of the Journal, to publish the Work in this journal and any other BMJ products and to exploit all rights, as set out in our [licence](#).

The Submitting Author accepts and understands that any supply made under these terms is made by BMJ to the Submitting Author unless you are acting as an employee on behalf of your employer or a postgraduate student of an affiliated institution which is paying any applicable article publishing charge ("APC") for Open Access articles. Where the Submitting Author wishes to make the Work available on an Open Access basis (and intends to pay the relevant APC), the terms of reuse of such Open Access shall be governed by a Creative Commons licence – details of these licences and which [Creative Commons](#) licence will apply to this Work are set out in our licence referred to above.

Other than as permitted in any relevant BMJ Author's Self Archiving Policies, I confirm this Work has not been accepted for publication elsewhere, is not being considered for publication elsewhere and does not duplicate material already published. I confirm all authors consent to publication of this Work and authorise the granting of this licence.

**Journal: BMJ Open**

**Abstract word count: 310** (288 without headings)

**Word count: 4345**

**Original submission date: 4<sup>th</sup> March 2022**

**Submission date following corrections: 18<sup>th</sup> July 2022**

## **Cognitive function and treatment response trajectories in first episode schizophrenia: evidence from a prospective cohort study.**

Edward Millgate<sup>1</sup>, Kira Griffiths<sup>1</sup>, Alice Egerton<sup>1,2</sup>, Eugenia Kravariti<sup>1,2</sup>, Cecilia Casetta<sup>1,3</sup>, JFW Deakin<sup>4,5</sup>, Richard J Drake<sup>4,5,6</sup>, Oliver D Howes<sup>1,2</sup>, Laura Kassoumeri<sup>1</sup>, Sobia Khan<sup>4</sup>, Steve Lankshear<sup>5</sup>, Jane Lees<sup>4,5,6</sup>, Shôn Lewis<sup>4,5,6</sup>, Elena Mikulskaaya<sup>4</sup>, Ebenezer Oloyede<sup>1,7</sup>, Rebecca Owens<sup>4</sup>, Rebecca Pollard<sup>1</sup>, Nathalie Rich<sup>8</sup>, Sophie E Smart<sup>9</sup>, Aviv Segev<sup>1,10,11</sup>, Kyra-Verena Sendt<sup>1</sup>, The STRATA Consortium, James H MacCabe<sup>1,3\*</sup>

<sup>1</sup> Department of Psychosis Studies, Institute of Psychiatry, Psychology and Neuroscience, King's College London, UK

<sup>2</sup> NIHR Biomedical Research Centre at South London and Maudsley NHS Foundation Trust, London, UK

<sup>3</sup> National Psychosis Service, South London and Maudsley NHS Foundation Trust, London, UK

<sup>4</sup> Division of Psychology and Mental Health, School of Biological Sciences, Faculty of Biology, Medicine and Health, University of Manchester, Manchester, UK

<sup>5</sup> Greater Manchester Mental Health NHS Foundation Trust, Manchester, UK

<sup>6</sup> Manchester Academic Health Science Centre, Manchester, UK

<sup>7</sup> Pharmacy Department, South London and Maudsley NHS Foundation Trust, UK

<sup>8</sup> Department of Epidemiology & Applied Clinical Research, University College London, UK

<sup>9</sup> MRC Centre for Neuropsychiatric Genetics and Genomics, Division of Psychological Medicine and Clinical Neurosciences, Cardiff University, Cardiff, UK

<sup>10</sup> Shalvata Mental Health Centre, Israel

<sup>11</sup> Sackler Faculty of Medicine, Tel Aviv University, Israel

\*Corresponding author: Edward.millgate@kcl.ac.uk

1  
2  
3 Department of Psychosis Studies,  
4  
5 Institute of Psychiatry, Psychology & Neuroscience,  
6  
7 16 de Crespigny Park,  
8  
9 Denmark Hill, London,  
10  
11 United Kingdom, SE5 8AF  
12  
13  
14  
15  
16  
17  
18  
19  
20  
21  
22  
23  
24  
25  
26  
27  
28  
29  
30  
31  
32  
33  
34  
35  
36  
37  
38  
39  
40  
41  
42  
43  
44  
45  
46  
47  
48  
49  
50  
51  
52  
53  
54  
55  
56  
57  
58  
59  
60

For peer review only

## Abstract

*Objectives:* This prospective cohort study tested for associations between baseline cognitive performance in individuals early within their first episode and antipsychotic treatment of psychosis. We hypothesised that poorer cognitive functioning at the initial assessment would be associated with poorer antipsychotic response following the subsequent six weeks.

*Setting:* NHS service users with a first episode schizophrenia diagnosis, recently starting antipsychotic medication, recruited from two UK sites (King's College London, UK & University of Manchester, UK). Participants attended three study visits following screening.

*Participants:* Eighty-nine participants were recruited, with 46 included in the main analysis. Participants required to be within the first two years of illness onset, had received minimal antipsychotic treatment, have the capacity to provide consent, and be able to read and write in English. Participants were excluded if they met remission criteria or showed mild to no symptoms.

*Primary and secondary outcomes:* Antipsychotic response was determined at 6-weeks using the Positive and Negative Syndrome Scale (PANSS), with cognitive performance assessed at each visit using the Brief Assessment of Cognition in Schizophrenia (BACS). The groups identified (responders and non-responders) from trajectory analyses, as well as from >20% PANSS criteria, were compared on baseline BACS performance.

*Results:* Trajectory analyses identified 84.78% of the sample as treatment responsive, and the remaining 15.22% as treatment non-responsive. Unadjusted and adjusted logistic regressions observed no significant relationship between baseline BACS on subscale and total performance (BACS t-score: OR = 0.98,  $p = .620$ , Cohen's  $d = .218$ ) and antipsychotic response at 6-weeks.

*Conclusions:* This investigation identified two clear trajectories of treatment response in the first six weeks of antipsychotic treatment. Responder and non-responder groups did not significantly differ on performance on the BACS, suggesting that larger samples may be required or that an association between cognitive performance and antipsychotic response is not observable in the first two-years of illness onset.

*Trial registration number:* REC: 17/NI/0209

*Keywords:* cognition, antipsychotic response, BACS, trajectories, first episode schizophrenia



## Article summary

### *Strengths and limitations of this study*

- The study examined baseline cognitive performance in a sample of first-episode schizophrenia, with patients recently starting antipsychotic treatment.
- Trajectory analyses identified two clear patterns of antipsychotic response at 6-weeks after baseline assessment.
- The lack of significant group differences in baseline cognitive performance between antipsychotic responders and non-responders may be a result of under-sampled comparisons or that brief cognitive batteries for schizophrenia may not be a useful predictor of response in the first two-years of illness onset.

## Introduction

Prompt intervention with pharmacological therapy for individuals with schizophrenia has been extensively recommended in the literature<sup>[1,2]</sup> and is reported to be associated with better functional outcomes<sup>[3,4,5]</sup>. As observed by Carbon & Correll<sup>[5]</sup>, a lack of early response and improvement to antipsychotic medication is a strong predictor of later non-response. A recent diagnostic test review has even argued that non/minimal response to antipsychotic medication in the first 2 weeks of treatment may be a sufficient indication to switch antipsychotic<sup>[6]</sup>. Early and accurate detection of treatment non-responders at first episode is also more likely to result in timely treatment with clozapine, which may be associated with better outcomes<sup>[7]</sup>. Indeed, Yoshimura et al<sup>[8]</sup> found that response to clozapine was ~80% in treatment resistant patients who were commenced on clozapine early in their illness course, with this depreciating to ~30% when clozapine initiation was delayed by more than 2.8years<sup>[7,8]</sup>.

Individuals who do not respond to antipsychotic medication are reported to have higher rates of smoking (56%), substance and alcohol abuse (51%) and suicidal ideation (44%), with annual treatment costs being 3 to 11 times larger than those who respond to antipsychotic medication<sup>[9]</sup>. In 2007, it was estimated that schizophrenia accounted for 30% of the total expenditure for adult mental health and social care services<sup>[10]</sup>, with additional economic and societal costs due to unemployment or absence from work. These total service costs, which were estimated at £2.2 billion in 2007, have the potential to reach £3.7 billion by 2026<sup>[11]</sup>. However, it has been suggested that early intervention programmes could aid in reducing these costs substantially if adequately introduced in first episode psychosis<sup>[12]</sup>, as earlier onset schizophrenia is associated with greater expected costs<sup>[11]</sup>.

Early cognitive deficits may be predictive of subsequent antipsychotic response in the first episode of illness and could aid in delivering fast, early, intervention. Cognitive

dysfunction in schizophrenia is observable prior to illness onset<sup>[13,14]</sup> and is strongly associated with poorer functional outcomes<sup>[15,16,17]</sup>. A recent meta-analysis comparing cognitive performance in known cases of antipsychotic treatment resistance and response<sup>[18]</sup> observed worse performance in treatment resistant samples across cognitive domains, with the strongest effect in measures of verbal memory and learning and language functions. However, it is possible that illness chronicity and exposure to long-term antipsychotic treatment may have influenced these findings.

Based on the current existing literature it is plausible to argue that there may be quantifiable cognitive differences between individuals who respond to antipsychotic medication and those who do not in the early stages of the illness; seeing as deficits in cognition are observable prior to illness onset<sup>[14,15]</sup> and poor early non-response to medication being predictive of future non-response<sup>[5]</sup>. Therefore if differences are observed between groups of differing response to medication (i.e. responders and non-responders), early in their illness and treatment, this will broaden our understanding of the relationship between cognition, schizophrenia, and antipsychotic response, as well as aid clinical utility by using brief cognitive measures as a screening for potential non-response in the first episode of schizophrenia. The American Psychological Association's Working Group on Screening and Assessment have provided guidelines for determining the appropriateness of a neuropsychological measure for cognitive screening within a clinical setting<sup>[19]</sup>. The guidelines are as follows: i. provide identification for those at high risk for impairment, ii. sensitive enough to identify those who need further review, iii. brief and narrow in scope, iv. can be administered at routine visits, v. can be administered by support staff or clinicians electronically and vi. can be used to monitor progress and outcomes<sup>[20]</sup>. In high-income countries, the use of brief assessment batteries such as the BACS have been found to meet these criteria put forward by the APA working group<sup>[21]</sup>.

1  
2  
3 Therefore, this prospective cohort study tested for associations between baseline  
4 cognitive performance using a brief cognitive battery, assessed at the initiation of  
5 antipsychotic treatment, in individuals early within their first episode of psychosis and their  
6 subsequent response to antipsychotic treatment. We hypothesised that poorer cognitive  
7 functioning at the initial assessment would be associated with poorer response over the  
8 subsequent six weeks of antipsychotic treatment.  
9  
10  
11  
12  
13  
14  
15  
16  
17  
18

## 19 **Methods**

### 20 *Design*

21  
22 The study used a prospective cohort design with a sample of patients with first-  
23 episode schizophrenia. Participants were assessed over a period of 6-weeks, with two follow-  
24 up visits following baseline and screening assessments.  
25  
26  
27  
28  
29

### 30 *Setting*

31  
32 The study was part of the ‘Schizophrenia: Treatment Resistance and Therapeutic  
33 Advances’ (STRATA) consortium which included two UK sites in this study; King’s College  
34 London (London, UK) and University of Manchester (Manchester, UK). The aim of the  
35 STRATA consortium is to identify neurobiological, cognitive, and genetic biomarkers of  
36 antipsychotic treatment resistance and non-response within schizophrenia and other related  
37 psychotic disorders.  
38  
39  
40  
41  
42  
43

### 44 *Patient and Public Involvement*

45  
46 In the early development and design of the study consultations with the NIHR  
47 Maudsley Biomedical Research Centre (BRC) Service User Advisory Group (SUAG) took  
48 place to determine the feasibility of the study and its’ assessments for service users. The  
49 NIHR Maudsley BRC Feasibility and Acceptability Support Team for Researchers (FAST-R)  
50 service was also used in order to receive feedback on consent forms, information sheets and  
51 protocols, as well as advice for recruitment strategies for service users.  
52  
53  
54  
55  
56

### 57 *Participants*

1  
2  
3  
4  
5  
6  
7  
8  
9  
10  
11  
12  
13  
14  
15  
16  
17  
18  
19  
20  
21  
22  
23  
24  
25  
26  
27  
28  
29  
30  
31  
32  
33  
34  
35  
36  
37  
38  
39  
40  
41  
42  
43  
44  
45  
46  
47  
48  
49  
50  
51  
52  
53  
54  
55  
56  
57  
58  
59  
60

89 participants aged between 18 – 65 years with a DSM-5 diagnosis of schizophrenia, schizoaffective, schizophreniform disorder, or psychosis (non-specified) (ICD-10: F20-F29) were recruited across two UK sites (King’s College London and University of Manchester). Inclusion required that participants were within the first two years of illness onset, defined using the date of first initial contact with services and clinical records. Inclusion also required that participants had received minimal antipsychotic medication, which was defined as having received antipsychotic treatment for no longer than 4 weeks prior to the baseline visit, after a period of being either antipsychotic naïve or antipsychotic-free for at least 14 days. Participants were assessed at baseline within the first 2 weeks of antipsychotic medication initiation. Participants also were required to have the capacity to provide consent and the ability to read and write in English. Participants were excluded if they met modified Andreasen remission criteria<sup>[22]</sup>, having mild or less scores on all of the following Structured Clinical Interview-Positive and Negative Syndrome Scale (SCI-PANSS)<sup>[23]</sup> items: delusions (P1), conceptual disorganisation (P2), hallucinatory behaviour (P3), blunted affect (N1), social withdrawal (N4), lack of spontaneity (N6), mannerisms/posturing (G5), unusual thought content (G9) on the day of assessment, as this would suggest that their symptoms were in remission. Participants were also required to show adherence to medication, as evidence by a Kemp Clinician Rating Scale (CRS)<sup>[24,25]</sup> of equal to or greater than 3 (“*Accepts only because compulsory, or very reluctant / requires persuasion, or questions the need for medication often*”).

Participants were assessed within the first 14 days of starting antipsychotic medication at baseline, 2-weeks from baseline assessment ( $\pm 7$  days of date) and 6-weeks from baseline assessment ( $\pm 7$  days of date), with the maximum cut-off for 6-week follow up being 56 days after baseline assessment (i.e. if an individual was assessed at the maximum follow-up periods at 2-week and 6-week visits; 8-weeks total). Participants were reimbursed for their time and expenses for participation in the study. Fourteen participants were withdrawn after providing consent, an additional 20 were withdrawn following baseline, and another 9 participants withdrawn following 2-week assessment. Participants were withdrawn if they were unable to attend the study visit, their symptoms were in remission (as per Andreasen

1  
2  
3 remission criteria<sup>[22]</sup>), or if they no longer wanted to take part in the study and requested to  
4 have their data removed (see Figure 1). 46 participants were eligible for inclusion in the  
5 analysis. All participants gave informed consent prior to enrolment. This study was approved  
6 by the Health and Social Care Research Ethics Committee A; REC: 17/NI/0209. All  
7 participants provided informed consent prior to participation.  
8  
9  
10  
11  
12

13 [Figure 1; CONSORT]  
14  
15  
16

### 17 *Definitions for treatment response status*

18  
19  
20 Treatment response groups were modelled through trajectory analyses using the *traj*  
21 command in STATA<sup>[26]</sup>. This tool estimates group-based trajectories over a specified time  
22 interval, clustering individuals who follow similar trajectories through a censored normal  
23 model. Akaike information criterion (AIC) and Bayesian information criterion (BIC) values  
24 were used to select the trajectory model with the lowest AIC and BIC values. Linear  
25 trajectories of up to five classes (1 to 5 trajectories) were assessed for eligibility. Rescaled  
26 PANSS scores<sup>[27]</sup> were calculated by subtracting 30 from total scores prior to producing  
27 estimates for percentage change at weeks 2 and 6 were used in the model. The results  
28 generated using this trajectory grouping were also compared to a more standard definition of  
29 treatment response which uses a >20% reduction in rescaled PANSS total scores from initial  
30 to final assessment<sup>[28,29]</sup>. Here patients not reaching a 20% reduction in rescaled PANSS total  
31 scores at the 6-week visits were categorised as non-responsive. These results are reported in  
32 the supplementary material.  
33  
34  
35  
36  
37  
38  
39  
40  
41  
42  
43  
44  
45  
46  
47

### 48 *Materials*

#### 49 *Clinical and demographic measures*

50 At baseline, participants completed the Kemp Clinician Rating Scale (CRS)<sup>[24,25]</sup>,  
51 Mini-international neuropsychiatric interview (MINI)<sup>[30]</sup> (M-Psychotic Disorders; A-Major  
52 Depressive Episode; D-Manic/Hypomanic/Bipolar), Structured Clinical Interview- Positive  
53 and Negative Syndrome Scale (SCI-PANSS)<sup>[23]</sup>, Clinician Rating Scale for Schizophrenia  
54 (CGI-SCH)<sup>[31]</sup> and provided demographic data. At each subsequent study visit the CRS, SCI-  
55 PANSS and CGI-SCH were repeated.  
56  
57  
58  
59  
60

### *Neuropsychological assessment*

Participants completed Version A of the Brief Assessment of Cognition in Schizophrenia (BACS)<sup>[32]</sup> at each study visit. The BACS was originally developed to assess cognitive functioning in schizophrenia, while also being an easily administrable and brief test battery<sup>[32]</sup>. The battery includes tasks pertaining to executive functions, working memory, motor/processing speed, verbal memory, verbal fluency, and attention cognitive domains. Version A includes the following tasks: i) list learning task (verbal memory); ii) digit sequencing task (working memory); iii) token motor task (motor speed); iv) category instances task (verbal fluency); v) symbol coding task (attention and speed of information processing) and vi) tower of London (executive function). All tasks on the BACS are scored such that higher scores represent better performance. Composite t and z scores for the BACS were generated using scores from published normative data<sup>[33]</sup>.

### *Data analysis*

All analyses were conducted in STATA 15/SE<sup>[34]</sup>. Wilcoxon signed rank tests were used to compare cognitive performance and symptom severity in the whole sample between visits (i.e. baseline assessment to 2-week, 2-week to 6-week, and baseline to 6-week) as not all symptom severity and cognitive variables were normally distributed. Baseline cognitive performance on the BACS was compared between trajectory groups using multivariable logistic regressions on the BACS composite and subscale scores. All models were adjusted for age, gender, and days from 1<sup>st</sup> psychotic symptom to baseline antipsychotic medication (i.e. duration of untreated psychosis; DUP). Results were then compared to groupings based on >20% reduction in rescaled PANSS total scores<sup>[27,28]</sup> from baseline assessment to 6-week follow-up (supplementary material Table S.1).

Finally, growth curve models were executed using the *xtmixed* command<sup>[35]</sup> to compare cognitive performance over time between trajectory groups to estimate any changes in cognitive performance over the study period (supplementary material Table S.2). These results were again compared to >20% PANSS reduction criteria for treatment response (supplementary material Table S.3).

## **Results**

Table 1 reports the demographic descriptive of the whole sample included in analysis (N = 46) at baseline, with PANSS symptom severity scores and BACS performance for each study visit illustrated in Table 2. Data regarding antipsychotic medication was provided by all participants at baseline, all of which were treated with 2<sup>nd</sup> generation antipsychotics. At baseline 45 participants provided PANSS symptom severity ratings, with 41 providing at least one baseline measure of the BACS (Table 2). Between baseline and 2-week assessment the average follow-up was 18.19 days (SD = 6.6) and between 2-week and 6-week this was 26.69 days (SD = 9.6). Between baseline and 6-week visit, the study trial lasted 43.86 days (SD = 7.2).

Between study visits, a significant improvement in PANSS positive symptoms scores was observed in the whole sample between baseline and 2-week visits, 2-week and 6-week visits, as well as baseline and 6-week assessments (Table 2). A significant improvement in PANSS total scores was observed between baseline and 2-week and baseline and 6-week visits. No significant differences in symptom severity were observed between visits for negative symptoms (Table 2). In the whole sample, cognitive performance on the BACS verbal memory significantly improved between baseline and 2-week visits, 2-week and 6-week visits, as well as baseline and 6-week assessments (Table 2). Verbal fluency significantly improved between baseline and 2-week visits. Symbol coding, Tower of London, and overall (t-score and z-score) performance improved significantly between baseline and 2-week visits and baseline and 6-week visits (Table 2).

Table 1

*Descriptive statistics of the whole sample demographics at consent (age) and baseline assessments*

| Variable                 | N              | M     | SD   | Min | Max |
|--------------------------|----------------|-------|------|-----|-----|
| Age (at consent)         | 46             | 27.30 | 8.17 | 18  | 50  |
| Gender ( <i>male</i> )   | 33<br>(71.74%) | -     | -    | -   | -   |
| Gender ( <i>female</i> ) | 13             | -     | -    | -   | -   |



|                                                                                                    |          |                                                                                                                                         |        |    |      |
|----------------------------------------------------------------------------------------------------|----------|-----------------------------------------------------------------------------------------------------------------------------------------|--------|----|------|
|                                                                                                    | (28.26%) |                                                                                                                                         |        |    |      |
| Age of illness onset (years)                                                                       | 46       | 26.53                                                                                                                                   | 8.45   | 18 | 49   |
| Duration from 1 <sup>st</sup> Psychotic symptom (days) to baseline antipsychotic (DUP)             | 46       | 248.30                                                                                                                                  | 245.06 | 0  | 726  |
| Duration from 1 <sup>st</sup> contact with mental health services (days) to baseline antipsychotic | 46       | 346.57                                                                                                                                  | 600.37 | 6  | 2358 |
| Chlorpromazine equivalents (mg/day)                                                                | 46       | 176.89                                                                                                                                  | 121.29 | 10 | 800  |
| Number of hospitalisations                                                                         | 46       | 0.89                                                                                                                                    | 0.64   | 0  | 3    |
| Years of education                                                                                 | 42       | 13.62                                                                                                                                   | 2.82   | 5  | 20   |
| CGI-SCH baseline score                                                                             | 56       | Minimally ill = 1<br>Mildly ill = 4<br>Moderately ill = 12<br>Markedly ill = 15<br>Severely ill = 12<br>Among the most severely ill = 1 | -      | -  | -    |
| Antipsychotic medication                                                                           | 51       | Amisulpride = 1<br>Aripiprazole = 19<br>Olanzapine = 16<br>Paliperidone = 1<br>Quetiapine = 4<br>Risperidone = 5                        | -      | -  | -    |

Note. *DUP* = Duration of untreated psychosis; *CGI-SCH* = Clinician Rating Scale for Schizophrenia.

Table 2

*Mean symptom severity as rated by the PANSS and BACS performance for the whole sample for each study visit*

| Variable              | Baseline |       |       | 2-week follow-up |       |       | 6-week follow-up |       |       | Baseline vs 2-week      | 2-week vs 6-week        | Baseline vs 6-week      |
|-----------------------|----------|-------|-------|------------------|-------|-------|------------------|-------|-------|-------------------------|-------------------------|-------------------------|
|                       | N        | M     | SD    | N                | M     | SD    | N                | M     | SD    | Wilcoxon signed-rank    | Wilcoxon signed-rank    | Wilcoxon signed-rank    |
| PANSS positive        | 45       | 11.93 | 4.77  | 36               | 9.17  | 5.36  | 38               | 7.26  | 5.13  | $Z = 2.76, p = .006^*$  | $Z = 2.67, p = .008^*$  | $Z = 4.50, p < .001^*$  |
| PANSS negative        | 45       | 10.36 | 6.87  | 36               | 10.31 | 7.15  | 38               | 9.58  | 7.78  | $Z = 0.78, p = .435$    | $Z = 0.62, p = .535$    | $Z = 1.17, p = .242$    |
| PANSS general         | 45       | 19.40 | 8.57  | 36               | 16.64 | 10.60 | 38               | 15.74 | 10.11 | $Z = 3.21, p = .001^*$  | $Z = 2.48, p = .013^*$  | $Z = 0.64, p = .524$    |
| PANSS total           | 45       | 41.69 | 16.11 | 36               | 36.11 | 20.03 | 38               | 32.58 | 20.04 | $Z = 3.10, p = .002^*$  | $Z = 1.46, p = .144$    | $Z = 3.35, p < .001^*$  |
| BACS Verbal memory    | 41       | 37.83 | 14.02 | 32               | 41.16 | 13.50 | 36               | 44.56 | 15.02 | $Z = -3.14, p = .002^*$ | $Z = -3.15, p = .002^*$ | $Z = -3.88, p < .001^*$ |
| BACS Digit sequencing | 38       | 18.03 | 4.06  | 32               | 17.84 | 4.33  | 34               | 17.85 | 4.69  | $Z = -0.78, p = .433$   | $Z = -0.40, p = .688$   | $Z = 0.40, p = .687$    |
| BACS Verbal fluency   | 42       | 28.60 | 7.85  | 31               | 31.87 | 9.47  | 35               | 30.20 | 8.38  | $Z = -1.96, p = .050^*$ | $Z = 0.83, p = .405$    | $Z = -1.62, p = .105$   |
| BACS Token motor      | 39       | 65.36 | 10.83 | 32               | 65.56 | 17.81 | 34               | 61.38 | 20.94 | $Z = -1.30, p = .193$   | $Z = -0.55, p = .583$   | $Z = -0.24, p = .812$   |
| BACS Symbol coding    | 39       | 40.15 | 13.13 | 32               | 45.69 | 12.56 | 32               | 47.25 | 11.96 | $Z = -2.25, p = .025^*$ | $Z = -1.07, p = .284$   | $Z = -3.29, p = .001^*$ |

|              |    |       |       |    |       |       |    |       |       |                         |                       |                         |
|--------------|----|-------|-------|----|-------|-------|----|-------|-------|-------------------------|-----------------------|-------------------------|
| BACS ToL     | 37 | 14.84 | 4.48  | 29 | 17.38 | 3.29  | 32 | 16.28 | 4.13  | $Z = -3.24, p = .001^*$ | $Z = 1.45, p = .148$  | $Z = -2.42, p = .016^*$ |
| BACS t-score | 33 | 26.67 | 11.98 | 28 | 34.14 | 11.68 | 30 | 30.87 | 14.95 | $Z = -3.79, p < .001^*$ | $Z = -0.29, p = .769$ | $Z = -3.66, p < .001^*$ |
| BACS z-score | 33 | -2.34 | 1.19  | 28 | -1.59 | 1.17  | 30 | -1.91 | 1.50  | $Z = -3.85, p < .001^*$ | $Z = -0.23, p = .820$ | $Z = -3.67, p < .001^*$ |

Note. *PANSS* = Positive and Negative Symptom Scale; *BACS* = Brief Assessment of Cognition in Schizophrenia; *ToL* = Tower of London.  
\* = significant at  $p = .05$  level.

### Trajectories of symptom change

BIC and AIC values were generated for five classes of trajectory models (Table 3). Of these both indices indicate that the two-trajectory group is best fitted to the data. This model estimated 73.7% of the sampled population to be from one linear trajectory, with the remaining 26.3% in another.

Table 3  
Selecting a trajectory model using BIC and AIC estimates

| No. of classes  | 1       | 2             | 3                     | 4                             | 5                                  |
|-----------------|---------|---------------|-----------------------|-------------------------------|------------------------------------|
| BIC             | -522.21 | -512.13       | -517.87               | -520.14                       | -525.88                            |
| AIC             | -519.46 | -506.64       | -509.64               | -509.17                       | -512.17                            |
| % in each class | 100%    | 73.7% ; 26.3% | 73.7% ; 26.3% ;<br>0% | 60.7% ; 23.7% ;<br>15.6% ; 0% | 60.7% ; 23.7% ;<br>15.6% ; 0% ; 0% |

Note. BIC = Bayesian Information Criteria; AIC = Akaike's Information Criteria.

The trajectories identified by the *traj* procedure are shown in Figure 2. The trajectories that emerged clearly represented responders versus non-responders. 39 participants (84.78%) of the sample were classified as antipsychotic treatment responsive and 7 as treatment non-responsive (15.22%). For responders, PANSS total score percentage change at 6 weeks was on average 32.89% (SD = 27.5) symptom improvement. For non-responders this was -21.03% (SD = 16.1) indicating a minimal and, in some cases, worsening in symptom severity. Shape estimates and standard errors of antipsychotic response are shown in Table 4. Treatment responders significantly improved over the 6-week period. Descriptive statistics of clinical and demographic variables between both trajectory groups (non-responder; responder) are presented in the supplementary material (Table S.4.) In comparison to those responsive to antipsychotic medication, non-responders were on average older, had a longer duration of time from first contact with mental health services to baseline antipsychotic medication, had marginally more hospitalisations, attained more years of education, and were treated at higher chlorpromazine equivalents (supplementary material Table S.4).

[Figure 2]

Table 4

Parameter estimates and standard errors for both trajectories of antipsychotic response

| Parameters     | Trajectories          |                    |
|----------------|-----------------------|--------------------|
|                | Non-responder (N = 7) | Responder (N = 39) |
| Intercept      | 2.54                  | -3.71              |
| Linear change  | 0.10                  | -0.54              |
| Standard error | 0.06                  | 0.09               |
| T statistic    | 1.61, $p = .111$      | -6.06, $p < .001$  |

*Cognitive performance*

There was a significant improvement in BACS verbal memory and symbol coding performance between baseline and 6-week assessments across the whole sample, with a significant improvement in Tower of London and BACS z and t composite scores between baseline and 2-week visits (Table 2). At baseline assessment, there was no difference in the BACS subscale or composite scores between antipsychotic responders and non-responders identified in the trajectory analysis (Table 5; Table 6). Growth curve models observed no significant change in cognitive performance over follow-up visits between trajectory groups (supplementary material Figure S.1, Table S.2). A similar pattern in results was observed when >20% PANSS reduction criteria was applied (supplementary material Figure S.2, Table S.3, Table S.5).

Table 5

*Baseline cognitive performance for both trajectory groups*

| BACS measure      | Non-responder |       |       | Responder |       |       |
|-------------------|---------------|-------|-------|-----------|-------|-------|
|                   | N             | Mean  | SD    | N         | Mean  | SD    |
| Verbal Memory     | 7             | 37.29 | 9.48  | 34        | 37.94 | 14.89 |
| Digit Sequencing  | 6             | 20.17 | 5.38  | 32        | 17.63 | 3.74  |
| Verbal Fluency    | 7             | 30.29 | 7.30  | 35        | 28.26 | 8.01  |
| Token Motor       | 7             | 66.86 | 8.93  | 32        | 65.03 | 11.30 |
| Symbol Coding     | 6             | 47.50 | 6.35  | 33        | 38.82 | 13.66 |
| Tower of London   | 7             | 14.71 | 3.77  | 30        | 14.87 | 4.69  |
| t-score composite | 6             | 28.83 | 14.36 | 27        | 26.19 | 11.65 |
| z-score composite | 6             | -2.12 | 1.41  | 27        | -2.39 | 1.16  |

Note. *BACS* =Brief Assessment of Cognition in Schizophrenia.

*Multivariable linear regression*

Univariable and multivariable logistic regression models adjusting for age and gender and duration of untreated psychosis (DUP) found no significant associations between BACS performance at baseline and response trajectory over 6 weeks (Table 6), with no association of any demographic or clinical variables in multivariable models. This was also observed when utilising the >20% reduction in PANSS total criteria (supplementary material Table S.4).

Table 6

Results from univariable and multivariable logistic regression models for response status and baseline BACS performance

| BACS task         | Unadjusted |      |              |      |         | Adjusted for age, gender, and DUP |      |              |      |         |
|-------------------|------------|------|--------------|------|---------|-----------------------------------|------|--------------|------|---------|
|                   | $\beta$    | SE   | 95%CI        | OR   | P-value | $\beta$                           | SE   | 95%CI        | OR   | P-value |
| Verbal Memory     | <0.01      | 0.03 | -0.06 ; 0.06 | 1.00 | .909    | <-0.01                            | 0.03 | -0.07 ; 0.06 | 1.00 | .918    |
| Digit Sequencing  | -0.17      | 0.12 | -0.41 ; 0.07 | 0.84 | .168    | -0.18                             | 0.13 | -0.44 ; 0.07 | 0.83 | .151    |
| Verbal Fluency    | -0.03      | 0.05 | -0.14 ; 0.07 | 0.97 | .530    | -0.05                             | 0.06 | -0.17 ; 0.07 | 0.95 | .417    |
| Token Motor       | -0.02      | 0.04 | -0.09 ; 0.06 | 0.98 | .683    | -0.02                             | 0.05 | -0.11 ; 0.08 | 0.99 | .737    |
| Symbol Coding     | -0.06      | 0.04 | -0.14 ; 0.02 | 0.94 | .145    | -0.07                             | 0.05 | -0.16 ; 0.02 | 0.93 | .114    |
| Tower of London   | 0.08       | 0.09 | -0.18 ; 0.19 | 1.01 | .935    | -0.01                             | 0.10 | -0.20 ; 0.19 | 0.99 | .947    |
| t score composite | -0.02      | 0.04 | -0.10 ; 0.06 | 0.98 | .620    | -0.02                             | 0.04 | -0.10 ; 0.06 | 0.98 | .594    |
| z score composite | -0.21      | 0.40 | -0.99 ; 0.58 | 0.81 | .603    | -0.23                             | 0.41 | -1.02 ; 0.57 | 0.80 | .573    |

Note. BACS = Brief Assessment of Cognition in Schizophrenia; CIs = confidence intervals; DUP = duration of untreated psychosis.

1  
2  
3  
4  
5  
6  
7  
8  
9  
10  
11  
12  
13  
14  
15  
16  
17  
18  
19  
20  
21  
22  
23  
24  
25  
26  
27  
28  
29  
30  
31  
32  
33  
34  
35  
36  
37  
38  
39  
40  
41  
42  
43  
44  
45  
46

For peer review only



## Discussion

This prospective study investigated the relationship between baseline cognitive performance and subsequent antipsychotic response over a 6-week treatment period. Across the whole sample, participants showed an overall reduction in symptom severity as well as an improvement in cognitive performance on the majority of BACS tasks. Trajectory analyses estimated two trajectory groups (73.7%, 26.3%) based on PANSS total % change from baseline; this was reflected as 84.78% of the sample being grouped as treatment responsive, and the remaining 15.22% as treatment non-responsive. Contrary to our hypothesis, baseline cognitive performance did not significantly differ between those identified as treatment responders or non-responders following 6 weeks of antipsychotic treatment. This finding remained the same when treatment response was defined as at least a 20% reduction in PANSS total scores, suggesting that there is no association between cognitive performance and antipsychotic response in first episode schizophrenia.

Across the 2-week and 6-week follow-up visits, an improvement in cognitive performance was observed for the whole sample on BACS measures of verbal memory, verbal fluency, symbol coding and Tower of London tasks, as well as the BACS composite scores. Most of these changes occurred between baseline and 2-week assessment (Table 2), with small decreases in performance on measures of verbal fluency, token motor and Tower of London tasks between 2-week and 6-week assessments, as well as for composite z and t scores. In contrast, there was a decline in performance in the token motor task across the follow-up period, and minimal changes in performance in the digit sequencing task.

The observed improvement in cognitive performance may reflect a beneficial outcome of antipsychotic treatment. 1<sup>st</sup> generation antipsychotics, introduced in the 1950s, target the positive symptoms observed in schizophrenia by acting as an antagonist at dopamine D2 receptors. Treatment with this group of antipsychotic drugs has been associated with motor and cognitive deficits in patients<sup>[36,37]</sup>. In contrast, 2<sup>nd</sup> generation antipsychotics are reported to have fewer extrapyramidal side effects<sup>[38]</sup>, with these drugs also acting as an antagonist at the serotonin 5HT2A receptor, in addition to D2 dopamine receptors. Research suggests that in comparison to 1<sup>st</sup> generation, 2<sup>nd</sup> generation antipsychotics can provide some improvement in cognitive performance (e.g. clozapine<sup>[39]</sup>). Guilera et al (2009)<sup>[40]</sup> found in their meta-analysis of 18 randomised controlled trials that 2<sup>nd</sup> generation drugs provided a

1  
2  
3 slight improvement in performance for global cognition, as well as slight but significant  
4 improvements in measures of procedural learning, language and verbal comprehension,  
5 verbal learning and memory and visual learning and memory.  
6  
7  
8  
9

10 As the whole study sample was treated with 2<sup>nd</sup> generation antipsychotic drugs at  
11 baseline assessment (Amisulpride = 1, Aripiprazole = 19, Olanzapine = 16, Paliperidone = 1,  
12 Quetiapine = 4 and Risperidone = 5), it is possible that the improvement in cognitive  
13 performance observed in our sample may be a result of 2<sup>nd</sup> antipsychotic treatment effects,  
14 although 1<sup>st</sup> generation antipsychotic use could not be compared. However it has also been  
15 argued that improvements in cognitive performance over longitudinal designs may instead  
16 reflect practice effects (e.g. familiarity and procedural learning<sup>[41]</sup>), meaning that  
17 improvement in cognitive performance in our sample could also be attributable to practice  
18 effects between study visits. Lees et al<sup>[42]</sup> estimated the magnitude of these effects using both  
19 the MATRICS Consensus Cognitive Battery (MCCB)<sup>[43]</sup> and the Cog State Schizophrenia  
20 Battery<sup>[44]</sup>, finding strong test-retest correlations between repeated baseline visits across  
21 cognitive batteries, with potential learning effects in social-emotional cognition. However,  
22 the authors also observed that participants may have failed to complete the initial baseline  
23 assessment due to difficulty in understanding the task, with the suggestion that future  
24 investigations using either battery would benefit from adopting initial practice sessions to  
25 reduce practice effects. Therefore an initial practice session with the BACS may have  
26 reduced the size of improvement observed in cognitive performance from baseline  
27 performance. Another way to determine the extent of practice effects in our sample would be  
28 to have a control group who is already stable on antipsychotic medication to see if similar  
29 outcomes are observed between groups.  
30  
31  
32  
33  
34  
35  
36  
37  
38  
39  
40  
41  
42  
43  
44  
45

46 Despite all of the sample being treated with 2<sup>nd</sup> generation antipsychotics, it is also  
47 possible that some anticholinergic effects, which differ between 2<sup>nd</sup> generation antipsychotic  
48 drugs<sup>[45]</sup>, may have affected cognitive performance. Long term exposure to antipsychotic  
49 medications of high anticholinergic activity have been previously reported to impact  
50 cognitive performance in patient samples<sup>[46,47,48]</sup>. Using low and high anticholinergic activity  
51 criteria from a recent review comparing medication effects (from Stroup & Gray<sup>[49]</sup>; refer to  
52 Table 1, pg. 342), our sample had 44% (N = 20) treated with a high anticholinergic  
53 antipsychotic, meaning that the absence of significant differences between groups may have  
54 been a result of heterogeneity in medication effects. Therefore, future investigations should  
55  
56  
57  
58  
59  
60

1  
2  
3 consider the role of antipsychotic treatment effects on cognitive outcomes within  
4 schizophrenia.  
5  
6  
7

8 Trajectory analyses identified two clearly defined trajectories of treatment response,  
9 both of which are consistent across both timepoints: one trajectory showing good response,  
10 and one of little to no response (Figure 2). Confidence intervals (Figure 2) show some  
11 overlap between trajectories in the first ~20 days since baseline assessment, with these  
12 becoming independent following this period, meaning that separation between trajectory  
13 groups was apparent at around 3 weeks. This supports the findings from Samara et al<sup>6</sup> who  
14 found poor/minimal response to antipsychotic treatment at 2-weeks to be predictive of future  
15 treatment non-response. In previous investigations using first episode samples, 4 or more  
16 trajectories have been identified<sup>[50,51]</sup>. However, both these investigations used longer periods  
17 of follow-up as well as raw un-adjusted PANSS scores in their analyses: as the minimum raw  
18 score of the PANSS is 30, it is recommended to rescale the scores by subtracting 30 from  
19 total scores prior to producing percentages and ratios<sup>[52]</sup>. Therefore building trajectory models  
20 using raw scores may not be appropriate to use as ratio operations (e.g. calculating  
21 proportions and percentages) require a natural zero point<sup>[52]</sup>.  
22  
23  
24  
25  
26  
27  
28  
29  
30  
31  
32  
33

34 Growth curve models which were used to quantify change in cognitive performance  
35 between trajectory groups observed no significant changes in performance between visits. It  
36 is possible that this may be due to under sampled groups, as significant improvements for  
37 verbal memory, symbol coding, Tower of London and composite scores were observed in the  
38 whole sample. When comparing our findings to a >20% reduction in rescaled PANSS total  
39 scores criteria<sup>[24,25]</sup> there were no changes in the pattern of results to growth curve models or  
40 logistic regression outcomes. Using this criterion for treatment response resulted in a more  
41 even distribution of the total sample to groups (responder = 17 ; non-responder = 21),  
42 providing more power to comparative analyses. However despite this there was no change in  
43 the pattern of results, meaning that this criterion provided no added benefit to this analysis  
44 over trajectory-based groupings. The lack of significant difference in baseline cognition  
45 between those classified as treatment responders or non-responders after 6 weeks of  
46 treatment in our study contrasts previous research conducted which observed impaired  
47 cognitive performance in the poor response trajectory at week 4, with good performance at  
48 baseline being predictive of a good response trajectory at week 4<sup>[51]</sup>. Likewise, longitudinal  
49 research using the MCCB<sup>[43]</sup> with first-episode schizophrenia patients assessed at baseline  
50  
51  
52  
53  
54  
55  
56  
57  
58  
59  
60

1  
2  
3 and at a 12-week follow up identified tasks of executive function and planning and reasoning  
4 ability as potential indices of antipsychotic response<sup>[53]</sup>, with similar findings observed when  
5 cognitive performance is correlated with symptom severity measures<sup>[54]</sup>.  
6  
7  
8

### 9 10 *Limitations*

11  
12 Previous investigations included sample sizes several magnitudes higher than in our  
13 study (Levine & Rabinowitz<sup>[51]</sup>; N = 491; Trampush et al<sup>[53]</sup>; N = 175) and it is likely that our  
14 sample size limited our ability to observe a significant relationship between cognitive  
15 performance and antipsychotic response. Using our sample's mean values for the BACS t  
16 composite score, a power calculation found that a total sample size of 31,304 samples would  
17 be required to detect a significant difference between trajectory groups at 90% power. When  
18 using the >20% PANSS reduction criteria this was N = 6,118, suggesting that both analyses  
19 were underpowered due to under sampling.  
20  
21  
22  
23  
24  
25

26  
27 Another considerable limitation of the conclusions from this investigation is the  
28 expectation of detecting meaningful change in both clinical response to medication and  
29 cognition in such a short duration of follow-up. Previous longitudinal investigations into  
30 cognitive change have noted that even a period of 1 to 3 years may not be substantial to  
31 detect changes in cognitive performance<sup>[55]</sup>, questioning the additional analyses in this study  
32 comparing performance between baseline and 2-week and 6-week study visits. Likewise,  
33 Emsley et al's<sup>[56]</sup> investigation with 522 participants with first episode schizophrenia found  
34 11.2% of their sample to not achieve clinical response (determined by a 20% improvement in  
35 PANSS total scores) until after 8 weeks, with the authors concluding that antipsychotic  
36 response is greatly varied and that longer investigations are needed to capture the large  
37 variability in clinical response<sup>[56]</sup>. Therefore it is also possible that there are participants  
38 within the sample who may have later responded to medication if the follow-up was at a  
39 longer duration, which may also partially support the lack of significant differences between  
40 groups in this study. Likewise, adopting secondary criteria for treatment response and non-  
41 response based off criteria from the TRIPP Working Group<sup>[57]</sup> would also help in seeing  
42 whether the groupings identified by trajectory analyses correspond to standardised guidelines,  
43 aiding in comparison between investigations.  
44  
45  
46  
47  
48  
49  
50  
51  
52  
53  
54  
55  
56  
57

58 Due to the issues with small sample sizes, it was not possible to adjust for additional  
59 variables which may be associated with cognitive performance. Negative symptoms have  
60

1  
2  
3 routinely been associated with cognitive performance<sup>[58,59]</sup>, including performance on the  
4 BACS<sup>[60]</sup>. Medication effects such as higher antipsychotic doses<sup>[61,62]</sup> and high  
5 anticholinergic antipsychotics<sup>[46,47,48]</sup>, have also been associated with deficits in cognitive  
6 performance. Future research should measure and adjust for these variables in order to  
7 determine the true association between cognition and treatment response without potential  
8 confounders.  
9  
10  
11  
12  
13

14  
15 It is also possible that premorbid histories of the sample may have resulted in a less  
16 consistent picture of cognitive performance between groups. For example, prior cannabis use,  
17 particularly during adolescence, has been found to improve cognitive performance on the  
18 BACS in comparison to those who haven't ever used cannabis<sup>[63]</sup>. In this investigation  
19 comparing performance on the BACS between patients with a schizophrenia diagnosis with  
20 and without adolescent cannabis use (ACU), those with ACU reported significantly higher  
21 composite scores, as well significant improvement in working memory and verbal memory  
22 tasks<sup>[63]</sup>. In our sample, 68% (N = 30) had previous experience of using cannabis, with the  
23 majority of this use occurring between ages 12-19 (N = 23). Therefore, it is possible that  
24 premorbid histories may have also blurred the cognitive differences between groups.  
25  
26  
27  
28  
29  
30  
31  
32  
33  
34

### 35 **Conclusions**

36  
37  
38 In this prospective cohort study, patients with a first episode diagnosis were assessed  
39 three times over a period of 6 weeks. Trajectory analyses using percentage change in PANSS  
40 total symptom scores identified two groups reflecting a good and poor response to  
41 antipsychotic medication. Baseline cognitive performance of these two groups did not predict  
42 response status at 6-weeks. This lack of discrimination between groups is potentially  
43 attributable to underpowered analyses as a result of small sample sizes but may also evidence  
44 that an association between cognition and treatment response is not observable in the first  
45 episode of schizophrenia. Overall this suggests that brief cognitive batteries for schizophrenia  
46 may not be a useful predictor of antipsychotic response in the first two-years of illness onset.  
47  
48  
49  
50  
51  
52  
53  
54  
55  
56  
57  
58  
59  
60

1  
2  
3  
4  
5  
6  
7  
8  
9  
10  
11  
12  
13  
14  
15  
16  
17  
18  
19  
20  
21  
22  
23  
24  
25  
26  
27  
28  
29  
30  
31  
32  
33  
34  
35  
36  
37  
38  
39  
40  
41  
42  
43  
44  
45  
46  
47  
48  
49  
50  
51  
52  
53  
54  
55  
56  
57  
58  
59  
60

*Contributorship:*

J.H.M., A.E., J.F.W.D., R.J.D., O.D.H., L.K., C.C., A.S., R.O., S.Le., J.L., S.La., S.K., and E.Mik contributed to the design and implementation of the study. E.O., E.M., R.P., N.R., K.G., C.C., S.E.S., and K.V.S. aided in data collection. E.M. completed analyses and wrote the manuscript with the assistance of J.H.M. K.G., N.R., J.H.M., A.E., E.K., R.J.D., A.S., C.C., B.D., provided comments on the manuscript.

*Funding statement:*

STRATA is funded by a grant from the Medical Research Council (MRC) to JHM, grant reference MR/L011794. EM's PhD is funded by the MRC-doctoral training partnership studentship in Biomedical Sciences at King's College London. J.H.M., E.K., A.E., O.D.H. are part funded by the National Institute for Health Research (NIHR) Biomedical Research Centre at South London and Maudsley NHS Foundation Trust and King's College London. The views expressed are those of the authors and not necessarily those of the NHS, the MRC, the NIHR or the Department of Health.

*Competing of Interests:*

The remaining authors report no conflicts of interest.

*Ethics approval:*

This study was approved by the Health and Social Care Research Ethics Committee A; REC: 17/NI/0209.

*Data sharing:*

At the time of submission, the data governance frameworks are being put in place to make a fully anonymized version of the data available to the wider research community via the TransSMART data sharing platform: <https://transmartfoundation.org/>. To apply for access to the data, please contact J.H.M. at [james.maccabe@kcl.ac.uk](mailto:james.maccabe@kcl.ac.uk).



## References

- 1  
2  
3  
4  
5  
6  
7 [1] McGlashan TH, Johannessen, JO. Early detection and intervention with schizophrenia:  
8 rationale. *Schizophrenia bulletin* 1996;22(2),201-222.
- 9  
10 [2] Birchwood M, McGorry P, Jackson H. Early intervention in schizophrenia. *The British Journal*  
11 *of Psychiatry* 1997;170(1),2-5.
- 12  
13 [3] Bond GR, Drake RE, Luciano A. Employment and educational outcomes in early intervention  
14 programmes for early psychosis: a systematic review. *Epidemiology and psychiatric sciences*  
15 2015; 24(5),446-457.
- 16  
17 [4] Bozzatello P, Bellino S, Rocca P. Predictive factors of treatment resistance in first episode of  
18 psychosis: A systematic review. *Frontiers in psychiatry* 2019;10, 67.
- 19  
20 [5] Carbon, M, Correll CU. Clinical predictors of therapeutic response to antipsychotics in  
21 schizophrenia. *Dialogues in clinical neuroscience* 2014;16(4), 505.
- 22  
23 [6] Samara, MT, Leucht C, Leeflang M, et al. Early improvement as a predictor of later response to  
24 antipsychotics in schizophrenia: a diagnostic test review. *American journal of psychiatry*  
25 2015;172(7),617-629.
- 26  
27 [7] Griffiths K, Millgate E, Egerton A, et al. Demographic and clinical variables associated with  
28 response to clozapine in schizophrenia: a systematic review and meta-analysis. *Psychological*  
29 *Medicine* 2021;1-11.
- 30  
31 [8] Yoshimura B, Yada Y, So R, et al. The critical treatment window of clozapine in treatment-  
32 resistant schizophrenia: secondary analysis of an observational study. *Psychiatry research*  
33 2017;250,65-70.
- 34  
35 [9] Kennedy JL, Altar CA, Taylor DL, et al. The social and economic burden of treatment-resistant  
36 schizophrenia: a systematic literature review. *International clinical psychopharmacology*  
37 2014;1;29(2):63-76.
- 38  
39 [10] McCrone P, Dhanasiri S, Patel A, et al. The cost of mental health care in England to 2026. *The*  
40 *King's Fund* 2008;1-65.
- 41  
42 [11] National Institute for Health and Care Excellence. Psychosis and schizophrenia in adults:  
43 prevention and management. *NICE*; 2014.
- 44  
45 [12] Tsiachristas A, Thomas T, Leal J, et al. Economic impact of early intervention in psychosis  
46 services: results from a longitudinal retrospective controlled study in England. *BMJ open*  
47 2016;1;6(10):e012611.
- 48  
49  
50  
51  
52  
53  
54  
55  
56  
57  
58  
59  
60

- 1  
2  
3  
4  
5  
6 [13] Reichenberg A, Caspi A, Harrington H, et al. Static and dynamic cognitive deficits in childhood  
7 preceding adult schizophrenia: a 30-year study. *American Journal of Psychiatry*  
8 2010;167(2),160-169.  
9  
10  
11 [14] MacCabe JH, Wicks S, Löfving S, et al. Decline in cognitive performance between ages 13 and  
12 18 years and the risk for psychosis in adulthood: a Swedish longitudinal cohort study in  
13 males. *Jama Psychiatry* 2013;70(3),261-270.  
14  
15  
16 [15] Green MF, Kern RS, Heaton RK. Longitudinal studies of cognition and functional outcome in  
17 schizophrenia: implications for MATRICS. *Schizophrenia research* 2004;72(1),41-51.  
18  
19  
20 [16] Carrión RE, Goldberg TE, McLaughlin D, et al. Impact of neurocognition on social and role  
21 functioning in individuals at clinical high risk for psychosis. *American Journal of Psychiatry*  
22 2011;168(8),806-813.  
23  
24  
25 [17] Horan WP, Green MF, DeGroot M, et al. Social cognition in schizophrenia, part 2: 12-month  
26 stability and prediction of functional outcome in first-episode patients. *Schizophrenia bulletin*  
27 2012;38(4),865-872.  
28  
29  
30 [18] Millgate E, Hide O, Lawrie SM, et al. Neuropsychological differences between treatment-  
31 resistant and treatment-responsive schizophrenia: a meta-analysis. *Psychological medicine*  
32 2022;52(1),1-13.  
33  
34  
35 [19] American Psychological Association. Distinguishing between screening and assessment for  
36 mental and behavioral health problems. 2014.  
37  
38  
39 [20] Roebuck-Spencer TM, Glen T, Puente AE, et al. Cognitive screening tests versus  
40 comprehensive neuropsychological test batteries: a national academy of neuropsychology  
41 education paper. *Archives of Clinical Neuropsychology* 2017 Jun 1;32(4):491-8.  
42  
43  
44 [21] Hurford IM, Marder SR, Keefe RS, et al. A brief cognitive assessment tool for schizophrenia:  
45 construction of a tool for clinicians. *Schizophrenia Bulletin* 2011 May 1;37(3):538-45.  
46  
47  
48 [22] Andreasen NC, Carpenter Jr WT, Kane JM, et al. Remission in schizophrenia: proposed criteria  
49 and rationale for consensus. *American Journal of Psychiatry* 2005;162(3),441-449.  
50  
51  
52 [23] Kay SR, Fiszbein A, Opler LA. The positive and negative syndrome scale (PANSS) for  
53 schizophrenia. *Schizophrenia bulletin* 1987;13(2),261-276.  
54  
55  
56 [24] Kemp R, Hayward P, Applewhaite G, et al. Compliance therapy in psychotic patients:  
57 randomised controlled trial. *Bmj* 1996;312(7027),345-349.  
58  
59  
60 [25] Kemp R, Kirov G, Everitt B, et al. Randomised controlled trial of compliance therapy: 18-  
month follow-up. *The British Journal of Psychiatry* 1998;172(5),413-419.



- 1  
2  
3 [26] Jones BL, Nagin DS. A note on a Stata plugin for estimating group-based trajectory  
4 models. *Sociological Methods & Research* 2013;42(4),608-613.  
5  
6 [27] Leucht S, Kissling W, Davis JM. The PANSS should be rescaled. *Schizophrenia bulletin*  
7 2010;36(3),461-462.  
8  
9 [28] Leucht S, Kane JM, Kissling W, et al. What does the PANSS mean?. *Schizophrenia research*  
10 2005;79(2-3),231-238.  
11  
12 [29] Leucht S, Davis JM, Engel RR, et al. Definitions of response and remission in schizophrenia:  
13 recommendations for their use and their presentation. *Acta Psychiatrica Scandinavica*  
14 2009;119,7-14.  
15  
16 [30] Sheehan DV, Lecrubier Y, Sheehan KH, et al. The Mini-International Neuropsychiatric  
17 Interview (MINI): the development and validation of a structured diagnostic psychiatric  
18 interview for DSM-IV and ICD-10. *The Journal of clinical psychiatry* 1998.  
19  
20 [31] Guy W. ECDEU assessment manual for psychopharmacology. *US Department of Health,*  
21 *Education, and Welfare, Public Health Service, Alcohol, Drug Abuse, and Mental Health*  
22 *Administration, National Institute of Mental Health, Psychopharmacology Research Branch,*  
23 *Division of Extramural Research Programs* 1976.  
24  
25 [32] Keefe RS, Goldberg TE, Harvey PD, et al. The Brief Assessment of Cognition in  
26 Schizophrenia: reliability, sensitivity, and comparison with a standard neurocognitive  
27 battery. *Schizophrenia research* 2004;68(2-3),283-297.  
28  
29 [33] Keefe RS, Harvey PD, Goldberg TE, et al. Norms and standardization of the Brief Assessment  
30 of Cognition in Schizophrenia (BACS). *Schizophrenia research* 2008;102(1-3),108-115.  
31  
32 [34] StataCorp. Stata Statistical Software: Release 15. 2017. College Station, TX: StataCorp LLC.  
33  
34 [35] StataCorp, LP. Stata multilevel mixed-effects reference manual. 2013. College Station, TX:  
35 StataCorp LP, 9(10).  
36  
37 [36] Kapur S, Zipursky R, Jones C, et al. Relationship between dopamine D2 occupancy, clinical  
38 response, and side effects: a double-blind PET study of first-episode schizophrenia. *American*  
39 *Journal of Psychiatry* 2000;157(4),514-520.  
40  
41 [37] Reilly JL, Harris MS, Keshavan MS, et al. Adverse effects of risperidone on spatial working  
42 memory in first-episode schizophrenia. *Archives of general psychiatry* 2006;63(11),1189-  
43 1197.  
44  
45 [38] Hill SK, Bishop JR, Palumbo D, et al. Effect of second-generation antipsychotics on cognition:  
46 current issues and future challenges. *Expert review of neurotherapeutics* 2010;10(1),43-57.  
47  
48  
49  
50  
51  
52  
53  
54  
55  
56  
57  
58  
59  
60

- 1  
2  
3 [39] Kane J, Honigfeld G, Singer J, et al. Clozapine for the treatment-resistant schizophrenic: a  
4 double-blind comparison with chlorpromazine. *Archives of general psychiatry*  
5 1988;45(9),789-796.  
6  
7  
8 [40] Guilera G, Pino O, Gómez-Benito J, et al. Antipsychotic effects on cognition in schizophrenia: a  
9 meta-analysis of randomised controlled trials. *The European Journal of Psychiatry*  
10 2009;23(2),77-89.  
11  
12  
13 [41] Goldberg TE, Goldman RS, Burdick KE, et al. Cognitive improvement after treatment with  
14 second-generation antipsychotic medications in first-episode schizophrenia: is it a practice  
15 effect?. *Archives of general psychiatry* 2007;64(10),1115-1122.  
16  
17  
18 [42] Lees J, Applegate E, Emsley R, et al. Calibration and cross-validation of MCCB and CogState  
19 in schizophrenia. *Psychopharmacology* 2015;232(21),3873-3882.  
20  
21  
22 [43] Nuechterlein KH, Green MF, Kern RS, et al. The MATRICS Consensus Cognitive Battery, part  
23 1: test selection, reliability, and validity. *American Journal of Psychiatry* 2008;165(2),203-  
24 213.  
25  
26  
27 [44] Maruff P, Thomas E, Cysique L, et al. Validity of the CogState brief battery: relationship to  
28 standardized tests and sensitivity to cognitive impairment in mild traumatic brain injury,  
29 schizophrenia, and AIDS dementia complex. *Archives of Clinical Neuropsychology*  
30 2009;24(2),165-178.  
31  
32  
33 [45] Lieberman JA. Managing anticholinergic side effects. *Primary care companion to the Journal*  
34 *of clinical psychiatry* 2004;6(suppl2),20.  
35  
36  
37 [46] Strauss ME, Reynolds KS, Jayaram G, et al. Effects of anticholinergic medication on memory in  
38 schizophrenia. *Schizophrenia Research* 1990;3(2),127-129.  
39  
40  
41 [47] Campbell N, Boustani M, Limbil T, et al. The cognitive impact of anticholinergics: a clinical  
42 review. *Clinical interventions in aging* 2009;4,225.  
43  
44  
45 [48] Joshi YB, Thomas ML, Braff DL, et al. Anticholinergic Medication Burden–Associated  
46 Cognitive Impairment in Schizophrenia. *American Journal of Psychiatry* 2021;appi-ajp.  
47  
48 [49] Stroup TS, Gray N. Management of common adverse effects of antipsychotic  
49 medications. *World Psychiatry* 2018;17(3),341-356.  
50  
51  
52 [50] Abdin E, Chong SA, Vaingankar JA, et al. Trajectories of positive, negative and general  
53 psychopathology symptoms in first episode psychosis and their relationship with functioning  
54 over a 2-year follow-up period. *PloS one* 2017;12(11),e0187141.  
55  
56  
57 [51] Levine SZ, Rabinowitz J. Trajectories and antecedents of treatment response over time in early-  
58 episode psychosis. *Schizophrenia bulletin* 2010;36(3),624-632.  
59  
60

- 1  
2  
3 [52] Obermeier M, Mayr A, Schennach-Wolff R, et al. Should the PANSS be  
4 rescaled?. *Schizophrenia bulletin* 2010;36(3),455-460.  
5  
6 [53] Trampush JW, Lencz T, DeRosse P, et al. Relationship of cognition to clinical response in first-  
7 episode schizophrenia spectrum disorders. *Schizophrenia bulletin* 2015;41(6),1237-1247.  
8  
9 [54] Bilder RM, Goldman RS, Robinson D, et al. Neuropsychology of first-episode schizophrenia:  
10 initial characterization and clinical correlates. *American Journal of Psychiatry*  
11 2000;157(4),549-559.  
12  
13 [55] Zanelli J, Mollon J, Sandin S, et al. Cognitive change in schizophrenia and other psychoses in  
14 the decade following the first episode. *American Journal of Psychiatry* 2019 Oct  
15 1;176(10):811-9.  
16  
17 [56] Emsley R, Rabinowitz J, Medori R. Time course for antipsychotic treatment response in first-  
18 episode schizophrenia. *American Journal of Psychiatry* 2006 Apr;163(4):743-5.  
19  
20 [57] Howes OD, McCutcheon R, Agid O, et al. Treatment-resistant schizophrenia: treatment  
21 response and resistance in psychosis (TRRIP) working group consensus guidelines on  
22 diagnosis and terminology. *American Journal of Psychiatry* 2017 Mar 1;174(3):216-29.  
23  
24 [58] Addington J, Addington D, Maticka-Tyndale E. Cognitive functioning and positive and negative  
25 symptoms in schizophrenia. *Schizophrenia research* 1991 Sep 1;5(2):123-34.  
26  
27 [59] Hoffman RE, Rakfeldt J. Cognition, negative symptoms, and diagnosis: a comparison of  
28 schizophrenic, bipolar, and control samples. *Neurosciences* 1997;9(1):81-9.  
29  
30 [60] Tanaka T, Tomotake M, Ueoka Y, et al. Clinical correlates associated with cognitive  
31 dysfunction in people with schizophrenia. *Psychiatry and clinical neurosciences* 2012  
32 Oct;66(6):491-8.  
33  
34 [61] Elie D, Poirier M, Chianetta JM, et al. Cognitive effects of antipsychotic dosage and  
35 polypharmacy: a study with the BACS in patients with schizophrenia and schizoaffective  
36 disorder. *Journal of Psychopharmacology* 2010 Jul;24(7):1037-44.  
37  
38 [62] Ballesteros A, Sánchez-Torres AM, López-Ilundain JM, et al. Is cognitive impairment  
39 associated with antipsychotic dose and anticholinergic equivalent loads in first-episode  
40 psychosis?. *Psychological medicine* 2018 Oct;48(13):2247-56.  
41  
42 [63] Hanna RC, Shalvoy A, Cullum CM, et al. Cognitive function in individuals with psychosis:  
43 moderation by adolescent cannabis use. *Schizophrenia bulletin* 2016;42(6),1496-1503.  
44  
45  
46  
47  
48  
49  
50  
51  
52  
53  
54  
55  
56  
57  
58  
59  
60

## Figure legends

*Figure 1.* A CONSORT based flowchart illustrating the number of participants and exclusions at each stage of the study trial.

*Figure 2.* Trajectory model of total PANSS score percentage change from baseline modelled over days since baseline assessment. The dotted linear trajectory reflects treatment non-responders and the complete line treatment responders. The grey dotted lines around each trajectory reflect the confidence intervals for trajectory each group. Percentages reflect the estimated amount of the sampled population included in each trajectory.

1  
2  
3  
4  
5  
6  
7  
8  
9  
10  
11  
12  
13  
14  
15  
16  
17  
18  
19  
20  
21  
22  
23  
24  
25  
26  
27  
28  
29  
30  
31  
32  
33  
34  
35  
36  
37  
38  
39  
40  
41  
42  
43  
44  
45  
46  
47  
48  
49  
50  
51  
52  
53  
54  
55  
56  
57  
58  
59  
60

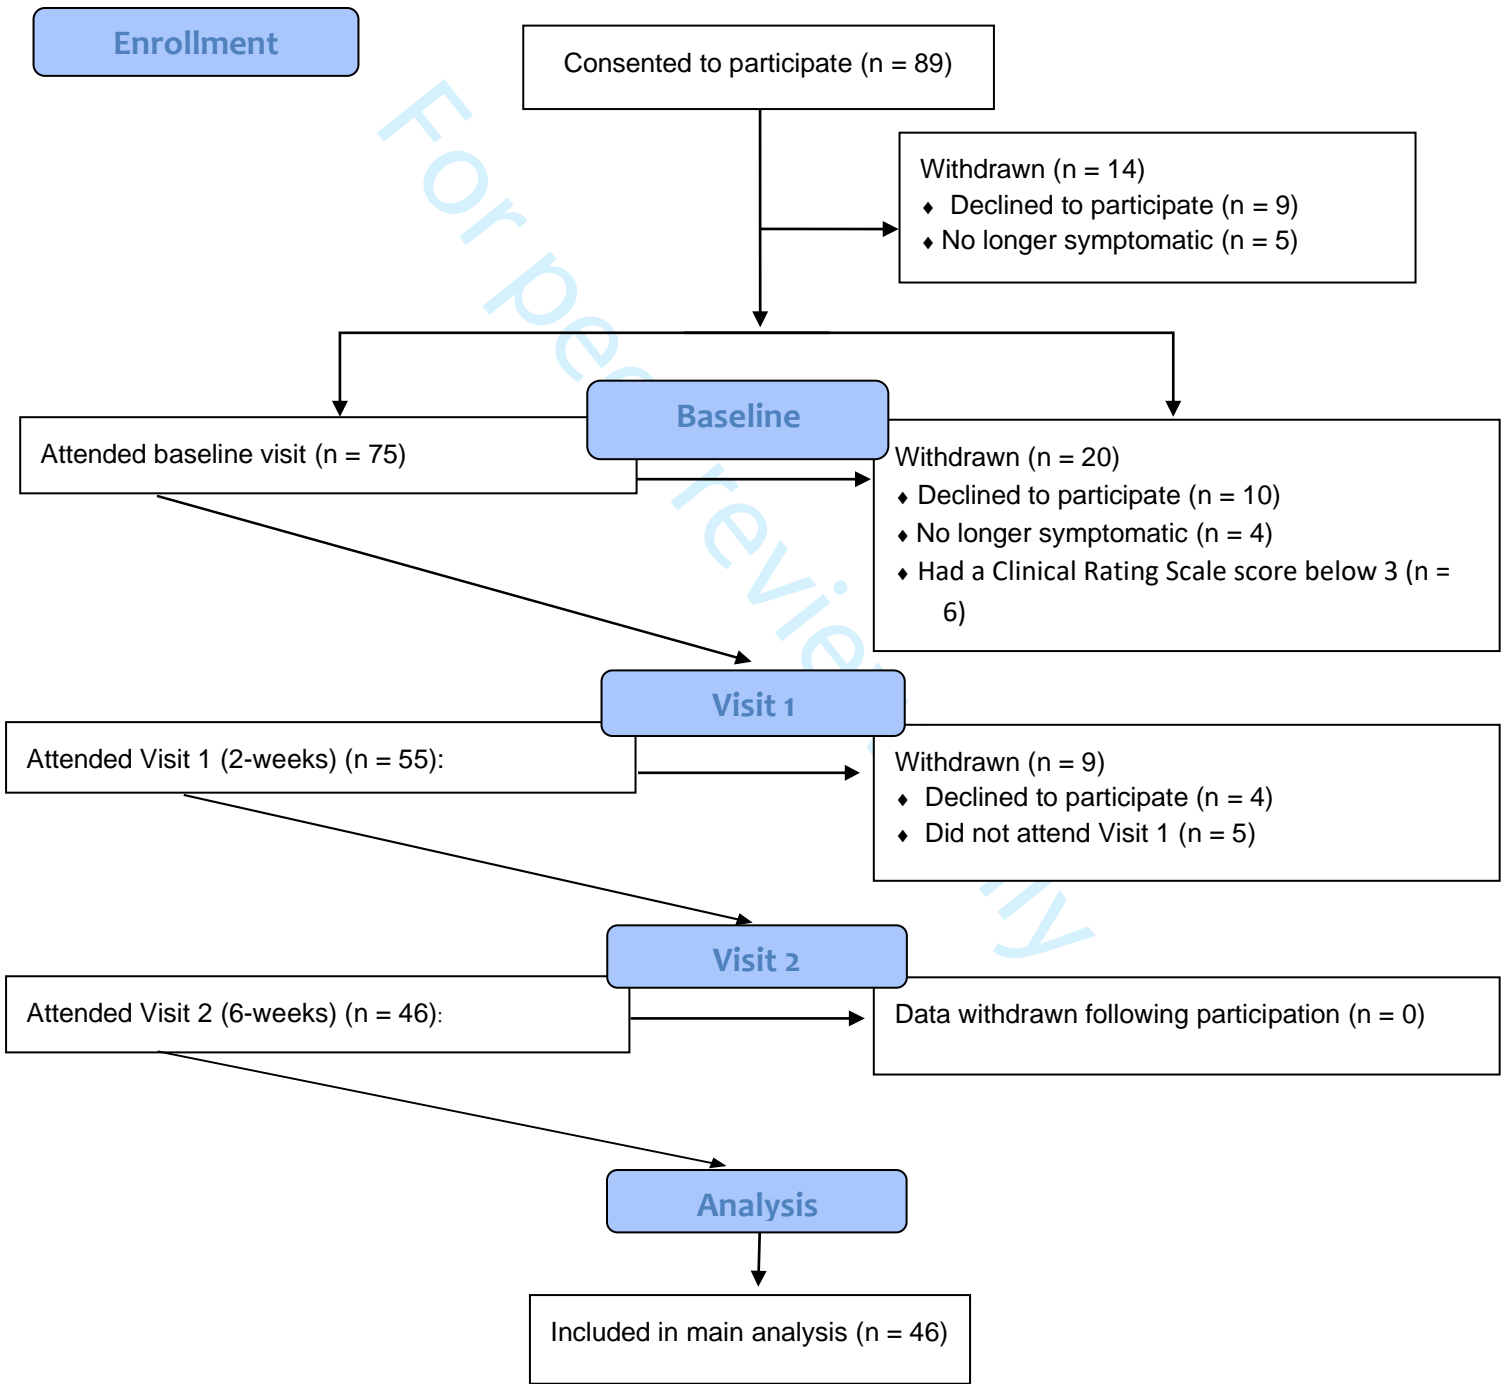

1  
2  
3  
4  
5  
6  
7  
8  
9  
10  
11  
12  
13  
14  
15  
16  
17  
18  
19  
20  
21  
22  
23  
24  
25  
26  
27  
28  
29  
30  
31  
32  
33  
34  
35  
36  
37  
38  
39  
40  
41  
42  
43  
44  
45  
46  
47  
48  
49  
50  
51  
52  
53  
54  
55  
56  
57  
58  
59  
60

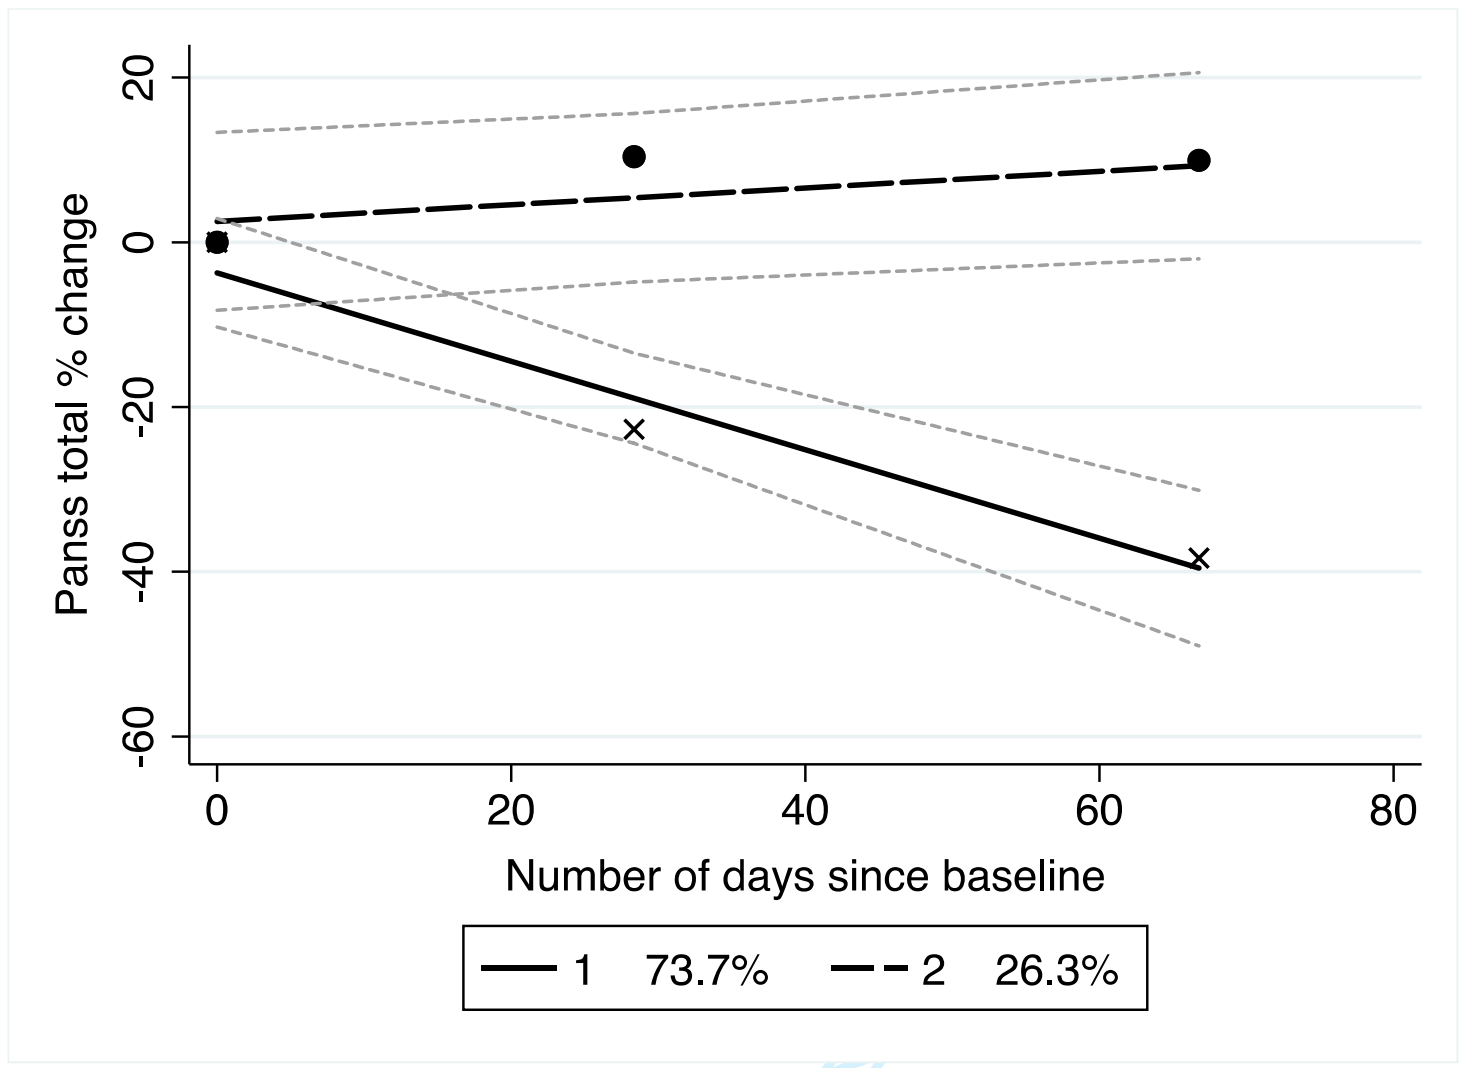

## Supplementary material

Table S.1

Results from univariable and multivariable logistic regression models for response status using PANSS total >20% reduction criteria and baseline BACS performance

| BACS task         | Unadjusted |      |              |      |         | Adjusted for age, gender and DUP |      |              |      |         |
|-------------------|------------|------|--------------|------|---------|----------------------------------|------|--------------|------|---------|
|                   | $\beta$    | SE   | 95%CI        | OR   | P-value | $\beta$                          | SE   | 95%CI        | OR   | P-value |
| Verbal Memory     | -0.01      | 0.03 | -0.07 ; 0.06 | 0.99 | .819    | <-0.01                           | 0.04 | -0.08 ; 0.07 | 1.00 | .920    |
| Digit Sequencing  | -0.10      | 0.10 | -0.29 ; 0.09 | 0.90 | .297    | -0.06                            | 0.11 | -0.27 ; 0.16 | 0.95 | .604    |
| Verbal Fluency    | 0.04       | 0.05 | -0.06 ; 0.14 | 1.04 | .403    | 0.07                             | 0.06 | -0.05 ; 0.18 | 1.07 | .259    |
| Token Motor       | 0.03       | 0.04 | -0.04 ; 0.10 | 1.03 | .432    | 0.06                             | 0.05 | -0.03 ; 0.15 | 1.06 | .218    |
| Symbol Coding     | -0.04      | 0.03 | -0.11 ; 0.02 | 0.96 | .206    | -0.05                            | 0.04 | -0.12 ; 0.03 | 0.96 | .237    |
| Tower of London   | 0.07       | 0.09 | -0.11 ; 0.24 | 1.07 | .445    | 0.07                             | 0.09 | -0.12 ; 0.25 | 1.07 | .465    |
| t score composite | <0.01      | 0.03 | -0.06 ; 0.07 | 1.00 | .924    | 0.01                             | 0.03 | -0.06 ; 0.07 | 1.00 | .892    |
| z score composite | 0.02       | 0.33 | -0.63 ; 0.66 | 1.02 | .960    | 0.03                             | 0.34 | -0.63 ; 0.69 | 1.03 | .931    |

Note. BACS = Brief Assessment of Cognition in Schizophrenia; DUP = duration of untreated psychosis; CIs = confidence intervals.

Table S.2

Results from unadjusted and adjusted growth curve models comparing trajectory groups on BACS performance across all visits

| BACS task         | Unadjusted |       |                |         | Adjusted for age, gender and DUP |      |               |         |
|-------------------|------------|-------|----------------|---------|----------------------------------|------|---------------|---------|
|                   | $\beta$    | SE    | 95%CI          | P-value | $\beta$                          | SE   | 95%CI         | P-value |
| Verbal Memory     | -2.15      | 45.79 | -13.49 ; 9.19  | .710    | -2.67                            | 5.88 | -14.20 ; 8.86 | .650    |
| Digit Sequencing  | -2.25      | 1.63  | -5.45 ; 1.095  | .167    | -2.03                            | 1.62 | -5.19 ; 1.14  | .210    |
| Verbal Fluency    | -0.90      | 3.29  | -7.36 ; 5.55   | .784    | -1.31                            | 2.99 | -7.17 ; 4.54  | .660    |
| Token Motor       | -2.00      | 6.39  | -14.52 ; 10.53 | .755    | -0.45                            | 5.89 | 11.99 ; 11.10 | .939    |
| Symbol Coding     | -3.81      | 5.56  | -14.71 ; 7.08  | .493    | -4.25                            | 5.42 | -14.87 ; 6.37 | .433    |
| Tower of London   | 0.18       | 1.56  | -2.87 ; 3.24   | .906    | 0.17                             | 1.57 | -2.90 ; 3.25  | .912    |
| t score composite | -2.49      | 5.70  | -13.66 ; 8.68  | .662    | -2.43                            | 5.78 | -13.76 ; 8.89 | .674    |
| z score composite | -0.25      | 0.57  | -1.37 ; 0.87   | .658    | -0.25                            | 0.58 | -1.38 ; 0.88  | .665    |

Note. BACS = Brief Assessment of Cognition in Schizophrenia; DUP = duration of untreated psychosis; CIs = confidence intervals



Table S.3

Results from unadjusted and adjusted growth curve models comparing PANSS >20% reduction groups on BACS performance across all visits

| BACS task         | Unadjusted |      |               |         | Adjusted for age, gender and DUP |      |               |         |
|-------------------|------------|------|---------------|---------|----------------------------------|------|---------------|---------|
|                   | $\beta$    | SE   | 95%CI         | P-value | $\beta$                          | SE   | 95%CI         | P-value |
| Verbal Memory     | -4.18      | 4.21 | -12.44 ; 4.08 | .321    | 3.27                             | 4.34 | -11.78 ; 5.23 | .451    |
| Digit Sequencing  | -2.36      | 1.35 | -5.01 ; 0.29  | .081    | -1.78                            | 1.34 | -4.41 ; 0.86  | .186    |
| Verbal Fluency    | -0.97      | 2.55 | -5.97 ; 4.02  | .703    | -0.54                            | 2.49 | -5.42 ; 4.35  | .830    |
| Token Motor       | 1.81       | 5.52 | -9.01 ; 12.62 | .744    | 5.60                             | 5.07 | -4.33 ; 15.53 | .269    |
| Symbol Coding     | -4.23      | 3.92 | -11.92 ; 3.46 | .281    | -4.13                            | 4.03 | -12.03 ; 3.78 | .306    |
| Tower of London   | -0.77      | 1.25 | -3.22 ; 1.68  | .538    | -0.56                            | 1.30 | -3.10 ; 1.98  | .667    |
| t score composite | -2.39      | 4.75 | -11.71 ; 6.93 | .615    | -1.56                            | 4.84 | -11.03 ; 7.92 | .747    |
| z score composite | -0.25      | 0.48 | -1.18 ; 0.68  | .600    | -0.17                            | 0.48 | -1.12 ; 0.78  | .728    |

Note. BACS = Brief Assessment of Cognition in Schizophrenia; DUP = duration of untreated psychosis; CIs = confidence intervals

Table S.4  
 Descriptive statistics of clinical and demographic variables for each trajectory group at baseline assessments

| Variable                                                                                           | Non-responder |        |        | Responder |        |        |
|----------------------------------------------------------------------------------------------------|---------------|--------|--------|-----------|--------|--------|
|                                                                                                    | N             | M      | SD     | N         | M      | SD     |
| Age (at consent)                                                                                   | 6             | 29.57  | 6.70   | 39        | 26.90  | 8.41   |
| Gender ( <i>male</i> )                                                                             | 6             | -      | -      | 27        | -      | -      |
| Gender ( <i>female</i> )                                                                           | 1             | -      | -      | 12        | -      | -      |
| Age of illness onset (years)                                                                       | 7             | 27.54  | 8.09   | 39        | 26.34  | 8.60   |
| Duration from 1 <sup>st</sup> Psychotic symptom (days) to baseline antipsychotic (DUP)             | 7             | 177.09 | 207.93 | 39        | 261.08 | 251.38 |
| Duration from 1 <sup>st</sup> contact with mental health services (days) to baseline antipsychotic | 7             | 461.89 | 801.88 | 39        | 325.88 | 567.82 |
| Chlorpromazine equivalents (mg/day)                                                                | 7             | 271.43 | 249.76 | 39        | 159.92 | 75.02  |
| Number of hospitalisations                                                                         | 7             | 1.00   | 1.00   | 39        | 0.87   | 0.57   |
| Years of education                                                                                 | 6             | 17.00  | 2.53   | 36        | 13.06  | 2.47   |
| PANSS positive                                                                                     | 7             | 11.14  | 6.67   | 38        | 12.08  | 4.44   |
| PANSS negative                                                                                     | 7             | 12.57  | 5.77   | 38        | 9.95   | 7.04   |
| PANSS general                                                                                      | 7             | 19.57  | 8.70   | 38        | 19.37  | 8.66   |
| PANSS total                                                                                        | 7             | 43.29  | 13.52  | 38        | 41.39  | 16.68  |

Note. PANSS = Positive and Negative Symptom Scale.

Table S.5  
 Baseline cognitive performance for both groups using >20% PANSS reduction criteria

| BACS measure     | N  | Non-responder |       | Responder |       |       |
|------------------|----|---------------|-------|-----------|-------|-------|
|                  |    | Mean          | SD    | N         | Mean  | SD    |
| Verbal Memory    | 13 | 37.54         | 8.27  | 20        | 36.65 | 12.73 |
| Digit Sequencing | 12 | 19.25         | 4.20  | 19        | 17.68 | 3.97  |
| Verbal Fluency   | 14 | 27.36         | 6.44  | 20        | 29.45 | 7.75  |
| Token Motor      | 13 | 63.23         | 10.94 | 18        | 66.39 | 11.24 |
| Symbol Coding    | 12 | 44.83         | 9.47  | 20        | 39.35 | 12.75 |
| Tower of London  | 12 | 14.17         | 5.11  | 17        | 15.41 | 3.79  |
| tscore composite | 10 | 26.30         | 13.35 | 17        | 26.77 | 12.28 |
| zscore composite | 10 | -2.36         | 1.31  | 17        | -2.34 | 1.22  |

*Note.* BACS = Brief Assessment of Cognition in Schizophrenia; PANSS = Positive and Negative Symptom Scale.

1  
2  
3  
4  
5  
6  
7  
8  
9  
10  
11  
12  
13  
14  
15  
16  
17  
18  
19  
20  
21  
22  
23  
24  
25  
26  
27  
28  
29  
30  
31  
32  
33  
34  
35  
36  
37  
38  
39  
40  
41  
42  
43  
44  
45  
46

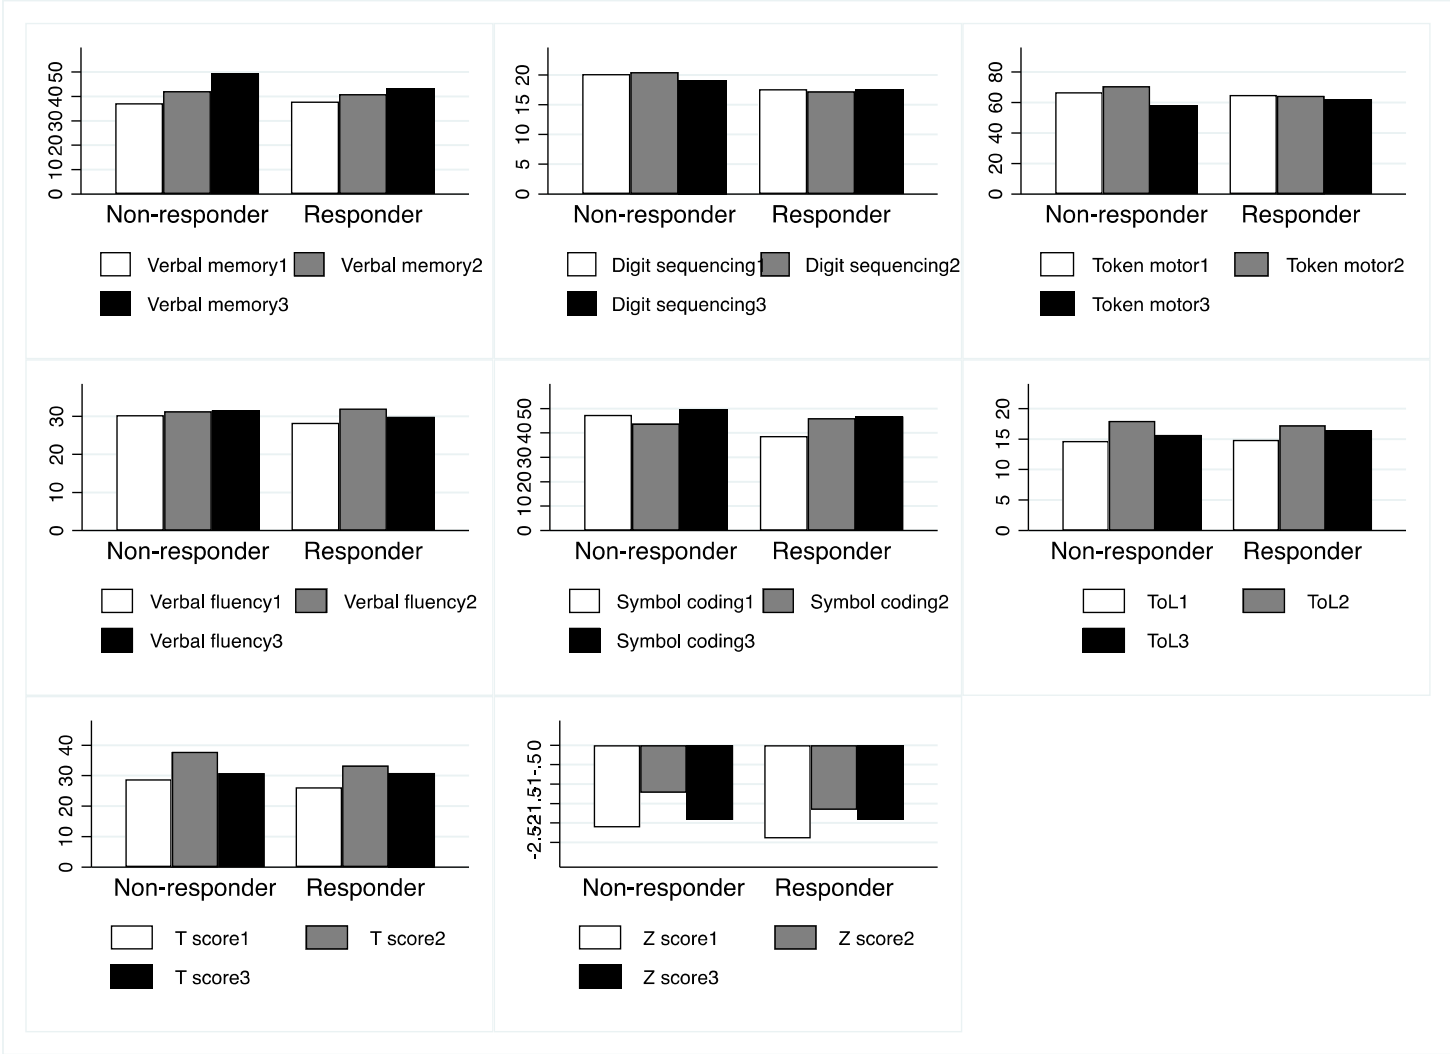

Figure S.1  
 Bar graphs comparing mean performance on BACS measures between trajectory groups (non-responder vs. responder) at each visit (*white* = baseline, *grey* = 2-week, *black* = 6-week)

Note. *BACS* = Brief Assessment of Cognition in Schizophrenia; *ToL* = Tower of London.

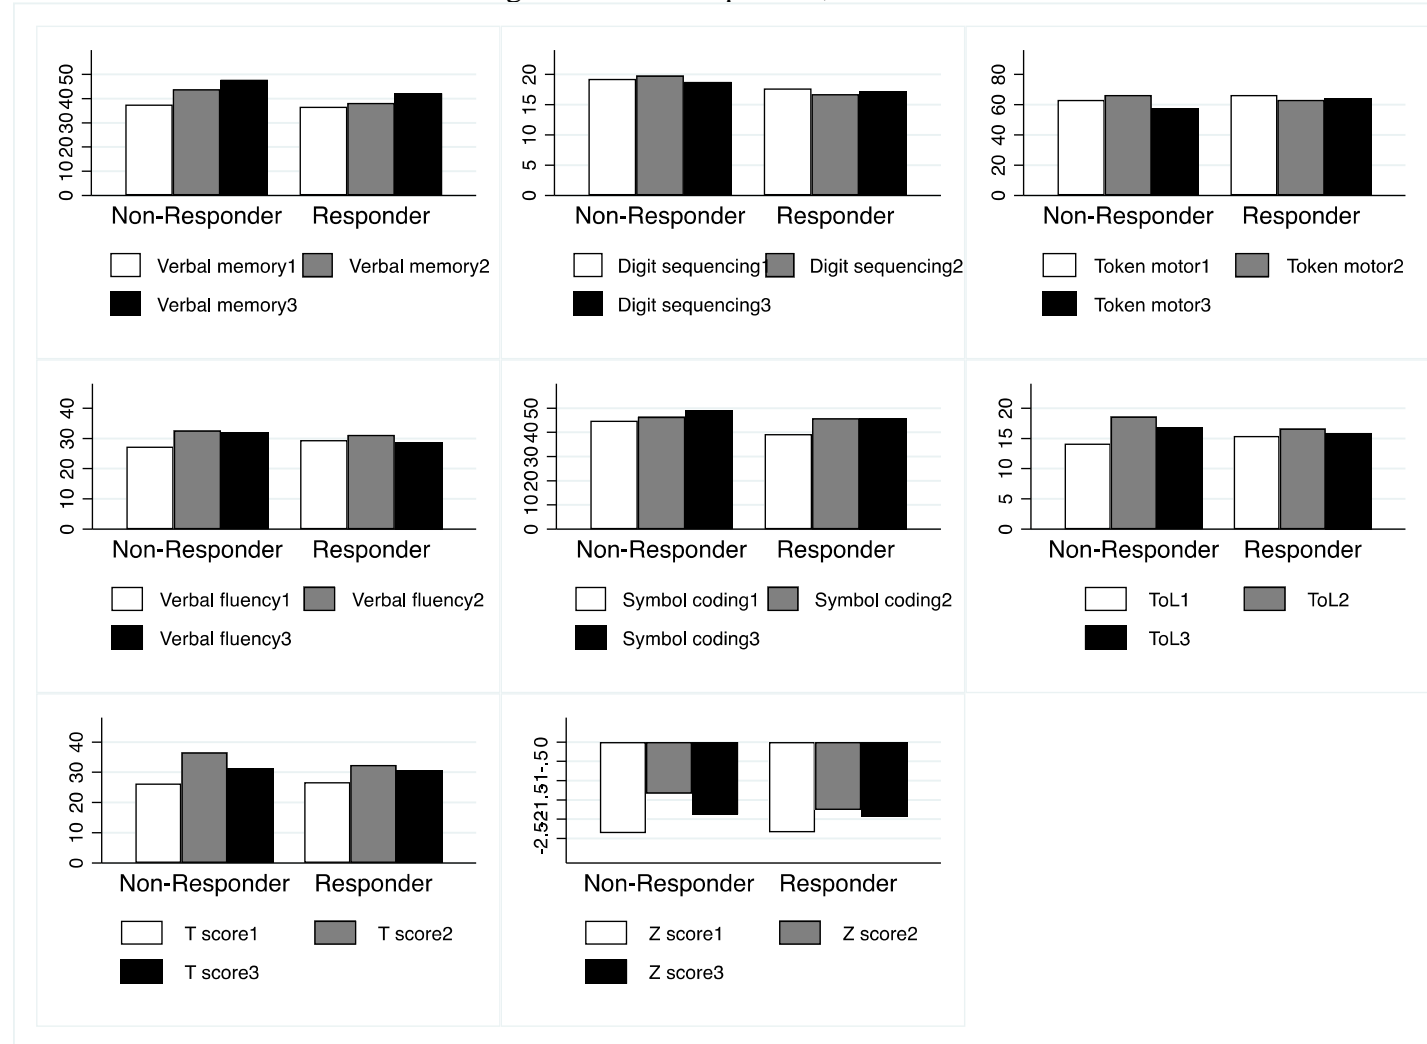

Figure S.2

Bar graphs comparing mean performance on BACS measures using >20% PANSS reduction criteria (non-responder vs. responder) at each visit (white = baseline, grey = 2-week, black = 6-week)

1  
2  
3  
4  
5  
6  
7  
8  
9  
10  
11  
12  
13  
14  
15  
16  
17  
18  
19  
20  
21  
22  
23  
24  
25  
26  
27  
28  
29  
30  
31  
32  
33  
34  
35  
36  
37  
38  
39  
40  
41  
42  
43  
44  
45  
46

Note. *BACS* = Brief Assessment of Cognition in Schizophrenia; *ToL* = Tower of London.

For peer review only

## STROBE Statement—checklist of items that should be included in reports of observational studies

|                           | Item No | Recommendation                                                                                                                                                                                                                                                                                                                                                                                                                                                         | Noted on pg. |
|---------------------------|---------|------------------------------------------------------------------------------------------------------------------------------------------------------------------------------------------------------------------------------------------------------------------------------------------------------------------------------------------------------------------------------------------------------------------------------------------------------------------------|--------------|
| <b>Title and abstract</b> | 1       | (a) Indicate the study's design with a commonly used term in the title or the abstract                                                                                                                                                                                                                                                                                                                                                                                 | 1,2,3        |
|                           |         | (b) Provide in the abstract an informative and balanced summary of what was done and what was found                                                                                                                                                                                                                                                                                                                                                                    | 1,2,3        |
| <b>Introduction</b>       |         |                                                                                                                                                                                                                                                                                                                                                                                                                                                                        |              |
| Background/rationale      | 2       | Explain the scientific background and rationale for the investigation being reported                                                                                                                                                                                                                                                                                                                                                                                   | 5,6          |
| Objectives                | 3       | State specific objectives, including any prespecified hypotheses                                                                                                                                                                                                                                                                                                                                                                                                       | 6            |
| <b>Methods</b>            |         |                                                                                                                                                                                                                                                                                                                                                                                                                                                                        |              |
| Study design              | 4       | Present key elements of study design early in the paper                                                                                                                                                                                                                                                                                                                                                                                                                | 7            |
| Setting                   | 5       | Describe the setting, locations, and relevant dates, including periods of recruitment, exposure, follow-up, and data collection                                                                                                                                                                                                                                                                                                                                        | 7            |
| Participants              | 6       | (a) <i>Cohort study</i> —Give the eligibility criteria, and the sources and methods of selection of participants. Describe methods of follow-up<br><i>Case-control study</i> —Give the eligibility criteria, and the sources and methods of case ascertainment and control selection. Give the rationale for the choice of cases and controls<br><i>Cross-sectional study</i> —Give the eligibility criteria, and the sources and methods of selection of participants | 7,8          |
|                           |         | (b) <i>Cohort study</i> —For matched studies, give matching criteria and number of exposed and unexposed<br><i>Case-control study</i> —For matched studies, give matching criteria and the number of controls per case                                                                                                                                                                                                                                                 | N/A          |
|                           |         |                                                                                                                                                                                                                                                                                                                                                                                                                                                                        |              |
| Variables                 | 7       | Clearly define all outcomes, exposures, predictors, potential confounders, and effect modifiers. Give diagnostic criteria, if applicable                                                                                                                                                                                                                                                                                                                               | 7,8          |
| Data sources/measurement  | 8*      | For each variable of interest, give sources of data and details of methods of assessment (measurement). Describe comparability of assessment methods if there is more than one group                                                                                                                                                                                                                                                                                   | 7,8          |
| Bias                      | 9       | Describe any efforts to address potential sources of bias                                                                                                                                                                                                                                                                                                                                                                                                              | 9            |
| Study size                | 10      | Explain how the study size was arrived at                                                                                                                                                                                                                                                                                                                                                                                                                              | N/A          |
| Quantitative variables    | 11      | Explain how quantitative variables were handled in the analyses. If applicable, describe which groupings were chosen and why                                                                                                                                                                                                                                                                                                                                           | 8,9          |
| Statistical methods       | 12      | (a) Describe all statistical methods, including those used to control for confounding                                                                                                                                                                                                                                                                                                                                                                                  | 8,9          |
|                           |         | (b) Describe any methods used to examine subgroups and interactions                                                                                                                                                                                                                                                                                                                                                                                                    | 8,9          |
|                           |         | (c) Explain how missing data were addressed                                                                                                                                                                                                                                                                                                                                                                                                                            | N/A          |
|                           |         | (d) <i>Cohort study</i> —If applicable, explain how loss to follow-up was addressed<br><i>Case-control study</i> —If applicable, explain how matching of cases and controls was addressed<br><i>Cross-sectional study</i> —If applicable, describe analytical methods taking account of sampling strategy                                                                                                                                                              | N/A          |
|                           |         | (e) Describe any sensitivity analyses                                                                                                                                                                                                                                                                                                                                                                                                                                  | 8,9          |

1  
2  
3  
4  
5  
6  
7  
8  
9  
10  
11  
12  
13  
14  
15  
16  
17  
18  
19  
20  
21  
22  
23  
24  
25  
26  
27  
28  
29  
30  
31  
32  
33  
34  
35  
36  
37  
38  
39  
40  
41  
42  
43  
44  
45  
46  
47  
48  
49  
50  
51  
52  
53  
54  
55  
56  
57  
58  
59  
60

Continued on next page

For peer review only



| <b>Results</b>           |     |                                                                                                                                                                                                              |                 |
|--------------------------|-----|--------------------------------------------------------------------------------------------------------------------------------------------------------------------------------------------------------------|-----------------|
| Participants             | 13* | (a) Report numbers of individuals at each stage of study—eg numbers potentially eligible, examined for eligibility, confirmed eligible, included in the study, completing follow-up, and analysed            | 6,7             |
|                          |     | (b) Give reasons for non-participation at each stage                                                                                                                                                         | 7,8             |
|                          |     | (c) Consider use of a flow diagram                                                                                                                                                                           | N/A             |
| Descriptive data         | 14* | (a) Give characteristics of study participants (eg demographic, clinical, social) and information on exposures and potential confounders                                                                     | 9,10            |
|                          |     | (b) Indicate number of participants with missing data for each variable of interest                                                                                                                          | N/A             |
|                          |     | (c) <i>Cohort study</i> —Summarise follow-up time (eg, average and total amount)                                                                                                                             | N/A             |
| Outcome data             | 15* | <i>Cohort study</i> —Report numbers of outcome events or summary measures over time                                                                                                                          | 10,11,supplem.  |
|                          |     | <i>Case-control study</i> —Report numbers in each exposure category, or summary measures of exposure                                                                                                         | N/A             |
|                          |     | <i>Cross-sectional study</i> —Report numbers of outcome events or summary measures                                                                                                                           | N/A             |
| Main results             | 16  | (a) Give unadjusted estimates and, if applicable, confounder-adjusted estimates and their precision (eg, 95% confidence interval). Make clear which confounders were adjusted for and why they were included | 17, supplem.    |
|                          |     | (b) Report category boundaries when continuous variables were categorized                                                                                                                                    | N/A             |
|                          |     | (c) If relevant, consider translating estimates of relative risk into absolute risk for a meaningful time period                                                                                             | 17, supplem.    |
| Other analyses           | 17  | Report other analyses done—eg analyses of subgroups and interactions, and sensitivity analyses                                                                                                               | 13-15, Supplem. |
| <b>Discussion</b>        |     |                                                                                                                                                                                                              |                 |
| Key results              | 18  | Summarise key results with reference to study objectives                                                                                                                                                     | 20,21           |
| Limitations              | 19  | Discuss limitations of the study, taking into account sources of potential bias or imprecision. Discuss both direction and magnitude of any potential bias                                                   | 23,24           |
| Interpretation           | 20  | Give a cautious overall interpretation of results considering objectives, limitations, multiplicity of analyses, results from similar studies, and other relevant evidence                                   | 20,21,23        |
| Generalisability         | 21  | Discuss the generalisability (external validity) of the study results                                                                                                                                        | 20,21,23        |
| <b>Other information</b> |     |                                                                                                                                                                                                              |                 |
| Funding                  | 22  | Give the source of funding and the role of the funders for the present study and, if applicable, for the original study on which the present article is based                                                | 25              |

\*Give information separately for cases and controls in case-control studies and, if applicable, for exposed and unexposed groups in cohort and cross-sectional studies.

**Note:** An Explanation and Elaboration article discusses each checklist item and gives methodological background and published examples of transparent reporting. The STROBE checklist is best used in conjunction with this article (freely available on the Web sites of PLoS Medicine at <http://www.plosmedicine.org/>, Annals of Internal Medicine at <http://www.annals.org/>, and Epidemiology at <http://www.epidem.com/>). Information on the STROBE Initiative is available at [www.strobe-statement.org](http://www.strobe-statement.org).

# BMJ Open

## Cognitive function and treatment response trajectories in first episode schizophrenia: evidence from a prospective cohort study.

|                               |                                                                                                                                                                                                                                                                                                                                                                                                                                                                                                                                                                                                                                                                                                                                                                                                                                                                                                                                                                                                                                                                                                                                                                                                                                                                                                                                                                                                                                                                                                                                                                                                                                                                                                                                                                                                                                                                                                                                                                                                                                                                                                                                                                                                                                                                                                                                                                                                 |
|-------------------------------|-------------------------------------------------------------------------------------------------------------------------------------------------------------------------------------------------------------------------------------------------------------------------------------------------------------------------------------------------------------------------------------------------------------------------------------------------------------------------------------------------------------------------------------------------------------------------------------------------------------------------------------------------------------------------------------------------------------------------------------------------------------------------------------------------------------------------------------------------------------------------------------------------------------------------------------------------------------------------------------------------------------------------------------------------------------------------------------------------------------------------------------------------------------------------------------------------------------------------------------------------------------------------------------------------------------------------------------------------------------------------------------------------------------------------------------------------------------------------------------------------------------------------------------------------------------------------------------------------------------------------------------------------------------------------------------------------------------------------------------------------------------------------------------------------------------------------------------------------------------------------------------------------------------------------------------------------------------------------------------------------------------------------------------------------------------------------------------------------------------------------------------------------------------------------------------------------------------------------------------------------------------------------------------------------------------------------------------------------------------------------------------------------|
| Journal:                      | <i>BMJ Open</i>                                                                                                                                                                                                                                                                                                                                                                                                                                                                                                                                                                                                                                                                                                                                                                                                                                                                                                                                                                                                                                                                                                                                                                                                                                                                                                                                                                                                                                                                                                                                                                                                                                                                                                                                                                                                                                                                                                                                                                                                                                                                                                                                                                                                                                                                                                                                                                                 |
| Manuscript ID                 | bmjopen-2022-062570.R2                                                                                                                                                                                                                                                                                                                                                                                                                                                                                                                                                                                                                                                                                                                                                                                                                                                                                                                                                                                                                                                                                                                                                                                                                                                                                                                                                                                                                                                                                                                                                                                                                                                                                                                                                                                                                                                                                                                                                                                                                                                                                                                                                                                                                                                                                                                                                                          |
| Article Type:                 | Original research                                                                                                                                                                                                                                                                                                                                                                                                                                                                                                                                                                                                                                                                                                                                                                                                                                                                                                                                                                                                                                                                                                                                                                                                                                                                                                                                                                                                                                                                                                                                                                                                                                                                                                                                                                                                                                                                                                                                                                                                                                                                                                                                                                                                                                                                                                                                                                               |
| Date Submitted by the Author: | 29-Sep-2022                                                                                                                                                                                                                                                                                                                                                                                                                                                                                                                                                                                                                                                                                                                                                                                                                                                                                                                                                                                                                                                                                                                                                                                                                                                                                                                                                                                                                                                                                                                                                                                                                                                                                                                                                                                                                                                                                                                                                                                                                                                                                                                                                                                                                                                                                                                                                                                     |
| Complete List of Authors:     | <p>Millgate, Edward; King's College London Institute of Psychiatry Psychology and Neuroscience, Department of Psychosis Studies<br/> Griffiths, Kira; King's College London Institute of Psychiatry Psychology and Neuroscience, Department of Psychosis Studies<br/> Egerton, Alice; King's College London Institute of Psychiatry Psychology and Neuroscience, Department of Psychosis Studies; South London and Maudsley NHS Foundation Trust, NIHR Biomedical Research Centre<br/> Kravariti, Eugenia; King's College London Institute of Psychiatry Psychology and Neuroscience, Department of Psychosis Studies; South London and Maudsley NHS Foundation Trust, NIHR Biomedical Research Centre<br/> Casetta, Cecilia; King's College London Institute of Psychiatry Psychology and Neuroscience, Department of Psychosis Studies; South London and Maudsley Mental Health NHS Trust, National Psychosis Service<br/> Deakin, Bill; University of Manchester, Faculty of Medicine, Biology and Health<br/> Drake, Richard; University of Manchester, Division of Psychology &amp; Mental Health; Greater Manchester Mental Health NHS Foundation Trust<br/> Howes, Oliver; King's College London Institute of Psychiatry Psychology and Neuroscience, Department of Psychosis Studies; South London and Maudsley NHS Foundation Trust, NIHR Biomedical Research Centre<br/> Kassoumeri, Laura; King's College London Institute of Psychiatry Psychology and Neuroscience, Department of Psychosis Studies<br/> Khan, Sobia; University of Manchester, Faculty of Medicine, Biology and Health<br/> Lankshear, Steve; Greater Manchester Mental Health NHS Foundation Trust<br/> Lees, Jane; Greater Manchester Mental Health NHS Foundation Trust; University of Manchester, Faculty of Medicine, Biology and Health<br/> Lewis, Shon; University of Manchester; Greater Manchester Mental Health NHS Foundation Trust<br/> Mikulskaya, Elena; University of Manchester, Faculty of Medicine, Biology and Health<br/> Oloyede, Ebenezer; King's College London Institute of Psychiatry Psychology and Neuroscience, Department of Psychosis Studies; South London and Maudsley NHS Foundation Trust, Pharmacy Department<br/> Owens, Rebecca; University of Manchester, Faculty of Medicine, Biology and Health<br/> Pollard, Rebecca; King's College London Institute of Psychiatry</p> |

|                                                        |                                                                                                                                                                                                                                                                                                                                                                                                                                                                                                                                                                                                                                                                                                                                                                                                                                           |
|--------------------------------------------------------|-------------------------------------------------------------------------------------------------------------------------------------------------------------------------------------------------------------------------------------------------------------------------------------------------------------------------------------------------------------------------------------------------------------------------------------------------------------------------------------------------------------------------------------------------------------------------------------------------------------------------------------------------------------------------------------------------------------------------------------------------------------------------------------------------------------------------------------------|
|                                                        | Psychology and Neuroscience, Department of Psychosis Studies<br>Rich, Nathalie; University College London, Department of Epidemiology &<br>Applied Clinical Research<br>Smart, Sophie; Cardiff University, Division of Psychological Medicine and<br>Clinical Neurosciences<br>Segev , Aviv; King's College London Institute of Psychiatry Psychology<br>and Neuroscience, Department of Psychosis Studies; Shalvata Mental<br>Health Center, Sackler Faculty of Medicine<br>Verena Sendt , Kyra; King's College London Institute of Psychiatry<br>Psychology and Neuroscience, Department of Psychosis Studies<br>MacCabe, James; Institute of Psychiatry Psychology and Neuroscience<br>Division of Academic Psychiatry, Department of Psychosis Studies; South<br>London and Maudsley NHS Foundation Trust, National Psychosis Service |
| <b>&lt;b&gt;Primary Subject<br/>Heading&lt;/b&gt;:</b> | Mental health                                                                                                                                                                                                                                                                                                                                                                                                                                                                                                                                                                                                                                                                                                                                                                                                                             |
| <b>Secondary Subject Heading:</b>                      | Public health, Patient-centred medicine, Mental health                                                                                                                                                                                                                                                                                                                                                                                                                                                                                                                                                                                                                                                                                                                                                                                    |
| <b>Keywords:</b>                                       | Schizophrenia & psychotic disorders < PSYCHIATRY, Adult psychiatry <<br>PSYCHIATRY, MENTAL HEALTH                                                                                                                                                                                                                                                                                                                                                                                                                                                                                                                                                                                                                                                                                                                                         |
|                                                        |                                                                                                                                                                                                                                                                                                                                                                                                                                                                                                                                                                                                                                                                                                                                                                                                                                           |

SCHOLARONE™  
Manuscripts



I, the Submitting Author has the right to grant and does grant on behalf of all authors of the Work (as defined in the below author licence), an exclusive licence and/or a non-exclusive licence for contributions from authors who are: i) UK Crown employees; ii) where BMJ has agreed a CC-BY licence shall apply, and/or iii) in accordance with the terms applicable for US Federal Government officers or employees acting as part of their official duties; on a worldwide, perpetual, irrevocable, royalty-free basis to BMJ Publishing Group Ltd ("BMJ") its licensees and where the relevant Journal is co-owned by BMJ to the co-owners of the Journal, to publish the Work in this journal and any other BMJ products and to exploit all rights, as set out in our [licence](#).

The Submitting Author accepts and understands that any supply made under these terms is made by BMJ to the Submitting Author unless you are acting as an employee on behalf of your employer or a postgraduate student of an affiliated institution which is paying any applicable article publishing charge ("APC") for Open Access articles. Where the Submitting Author wishes to make the Work available on an Open Access basis (and intends to pay the relevant APC), the terms of reuse of such Open Access shall be governed by a Creative Commons licence – details of these licences and which [Creative Commons](#) licence will apply to this Work are set out in our licence referred to above.

Other than as permitted in any relevant BMJ Author's Self Archiving Policies, I confirm this Work has not been accepted for publication elsewhere, is not being considered for publication elsewhere and does not duplicate material already published. I confirm all authors consent to publication of this Work and authorise the granting of this licence.

**Journal: BMJ Open**

**Abstract word count: 310** (288 without headings)

**Word count: 4341**

**Original submission date: 4<sup>th</sup> March 2022**

**Submission date following corrections: 18<sup>th</sup> July 2022**

**Submission date following final corrections: 28<sup>th</sup> September 2022**

## **Cognitive function and treatment response trajectories in first episode schizophrenia: evidence from a prospective cohort study.**

Edward Millgate<sup>1</sup>, Kira Griffiths<sup>1</sup>, Alice Egerton<sup>1,2</sup>, Eugenia Kravariti<sup>1,2</sup>, Cecilia Casetta<sup>1,3</sup>, Bill Deakin<sup>4,5</sup>, Richard J Drake<sup>4,5,6</sup>, Oliver D Howes<sup>1,2</sup>, Laura Kassoumeri<sup>1</sup>, Sobia Khan<sup>4</sup>, Steve Lankshear<sup>5</sup>, Jane Lees<sup>4,5,6</sup>, Shôn Lewis<sup>4,5,6</sup>, Elena Mikulskaya<sup>4</sup>, Ebenezer Oloyede<sup>1,7</sup>, Rebecca Owens<sup>4</sup>, Rebecca Pollard<sup>1</sup>, Nathalie Rich<sup>8</sup>, Sophie E Smart<sup>9</sup>, Aviv Segev<sup>1,10,11</sup>, Kyra-Verena Sendt<sup>1</sup>, The STRATA Consortium, James H MacCabe<sup>1,3\*</sup>

<sup>1</sup> Department of Psychosis Studies, Institute of Psychiatry, Psychology and Neuroscience, King's College London, UK

<sup>2</sup> NIHR Biomedical Research Centre at South London and Maudsley NHS Foundation Trust, London, UK

<sup>3</sup> National Psychosis Service, South London and Maudsley NHS Foundation Trust, London, UK

<sup>4</sup> Division of Psychology and Mental Health, School of Biological Sciences, Faculty of Biology, Medicine and Health, University of Manchester, Manchester, UK

<sup>5</sup> Greater Manchester Mental Health NHS Foundation Trust, Manchester, UK

<sup>6</sup> Manchester Academic Health Science Centre, Manchester, UK

<sup>7</sup> Pharmacy Department, South London and Maudsley NHS Foundation Trust, UK

<sup>8</sup> Department of Epidemiology & Applied Clinical Research, University College London, UK

<sup>9</sup> MRC Centre for Neuropsychiatric Genetics and Genomics, Division of Psychological Medicine and Clinical Neurosciences, Cardiff University, Cardiff, UK

<sup>10</sup> Shalvata Mental Health Centre, Israel

<sup>11</sup> Sackler Faculty of Medicine, Tel Aviv University, Israel

1  
2  
3 \*Corresponding author: Edward.millgate@kcl.ac.uk  
4

5 Department of Psychosis Studies,  
6  
7 Institute of Psychiatry, Psychology & Neuroscience,  
8  
9 16 de Crespigny Park,  
10  
11 Denmark Hill, London,  
12  
13 United Kingdom, SE5 8AF  
14  
15  
16  
17  
18  
19  
20  
21  
22  
23  
24  
25  
26  
27  
28  
29  
30  
31  
32  
33  
34  
35  
36  
37  
38  
39  
40  
41  
42  
43  
44  
45  
46  
47  
48  
49  
50  
51  
52  
53  
54  
55  
56  
57  
58  
59  
60

For peer review only

## Abstract

*Objectives:* This prospective cohort study tested for associations between baseline cognitive performance in individuals early within their first episode and antipsychotic treatment of psychosis. We hypothesised that poorer cognitive functioning at the initial assessment would be associated with poorer antipsychotic response following the subsequent six weeks.

*Setting:* NHS service users with a first episode schizophrenia diagnosis, recently starting antipsychotic medication, recruited from two UK sites (King's College London, UK & University of Manchester, UK). Participants attended three study visits following screening.

*Participants:* Eighty-nine participants were recruited, with 46 included in the main analysis. Participants required to be within the first two years of illness onset, had received minimal antipsychotic treatment, have the capacity to provide consent, and be able to read and write in English. Participants were excluded if they met remission criteria or showed mild to no symptoms.

*Primary and secondary outcomes:* Antipsychotic response was determined at 6-weeks using the Positive and Negative Syndrome Scale (PANSS), with cognitive performance assessed at each visit using the Brief Assessment of Cognition in Schizophrenia (BACS). The groups identified (responders and non-responders) from trajectory analyses, as well as from >20% PANSS criteria, were compared on baseline BACS performance.

*Results:* Trajectory analyses identified 84.78% of the sample as treatment responsive, and the remaining 15.22% as treatment non-responsive. Unadjusted and adjusted logistic regressions observed no significant relationship between baseline BACS on subscale and total performance (BACS t-score: OR = 0.98,  $p = .620$ , Cohen's  $d = .218$ ) and antipsychotic response at 6-weeks.

*Conclusions:* This investigation identified two clear trajectories of treatment response in the first six weeks of antipsychotic treatment. Responder and non-responder groups did not significantly differ on performance on the BACS, suggesting that larger samples may be required or that an association between cognitive performance and antipsychotic response is not observable in the first two-years of illness onset.

*Trial registration number:* REC: 17/NI/0209

*Keywords:* cognition, antipsychotic response, BACS, trajectories, first episode schizophrenia

## Article summary

### *Strengths and limitations of this study*

- The study examined cognitive performance in a multicentre sample of first episode psychosis
- Cognitive performance was assessed at each study period with the BACS, a reliable and well-validated brief test battery which is specifically designed for schizophrenia
- The study used symptom ratings on the PANSS to determine response to treatment, a gold standard proxy within the current research field.



## Introduction

Prompt intervention with pharmacological therapy for individuals with schizophrenia has been extensively recommended in the literature<sup>[1,2]</sup> and is reported to be associated with better functional outcomes<sup>[3,4,5]</sup>. As observed by Carbon & Correll<sup>[5]</sup>, a lack of early response and improvement to antipsychotic medication is a strong predictor of later non-response. A recent diagnostic test review has even argued that non/minimal response to antipsychotic medication in the first 2 weeks of treatment may be a sufficient indication to switch antipsychotic<sup>[6]</sup>. Early and accurate detection of treatment non-responders at first episode is also more likely to result in timely treatment with clozapine, which may be associated with better outcomes<sup>[7]</sup>. Indeed, Yoshimura et al<sup>[8]</sup> found that response to clozapine was ~80% in treatment resistant patients who were commenced on clozapine early in their illness course, with this depreciating to ~30% when clozapine initiation was delayed by more than 2.8years<sup>[7,8]</sup>.

Individuals who do not respond to antipsychotic medication are reported to have higher rates of smoking (56%), substance and alcohol abuse (51%) and suicidal ideation (44%), with annual treatment costs being 3 to 11 times larger than those who respond to antipsychotic medication<sup>[9]</sup>. In 2007, it was estimated that schizophrenia accounted for 30% of the total expenditure for adult mental health and social care services<sup>[10]</sup>, with additional economic and societal costs due to unemployment or absence from work. These total service costs, which were estimated at £2.2 billion in 2007, have the potential to reach £3.7 billion by 2026<sup>[11]</sup>. However, it has been suggested that early intervention programmes could aid in reducing these costs substantially if adequately introduced in first episode psychosis<sup>[12]</sup>, as earlier onset schizophrenia is associated with greater expected costs<sup>[11]</sup>.

Early cognitive deficits may be predictive of subsequent antipsychotic response in the first episode of illness and could aid in delivering fast, early, intervention. Cognitive

dysfunction in schizophrenia is observable prior to illness onset<sup>[13,14]</sup> and is strongly associated with poorer functional outcomes<sup>[15,16,17]</sup>. A recent meta-analysis comparing cognitive performance in known cases of antipsychotic treatment resistance and response<sup>[18]</sup> observed worse performance in treatment resistant samples across cognitive domains, with the strongest effect in measures of verbal memory and learning and language functions. However, it is possible that illness chronicity and exposure to long-term antipsychotic treatment may have influenced these findings.

Based on the current existing literature it is plausible to argue that there may be quantifiable cognitive differences between individuals who respond to antipsychotic medication and those who do not in the early stages of the illness; seeing as deficits in cognition are observable prior to illness onset<sup>[14,15]</sup> and poor early non-response to medication being predictive of future non-response<sup>[5]</sup>. Therefore if differences are observed between groups of differing response to medication (i.e. responders and non-responders), early in their illness and treatment, this will broaden our understanding of the relationship between cognition, schizophrenia, and antipsychotic response, as well as aid clinical utility by using brief cognitive measures as a screening for potential non-response in the first episode of schizophrenia. The American Psychological Association's Working Group on Screening and Assessment have provided guidelines for determining the appropriateness of a neuropsychological measure for cognitive screening within a clinical setting<sup>[19]</sup>. The guidelines are as follows: i. provide identification for those at high risk for impairment, ii. sensitive enough to identify those who need further review, iii. brief and narrow in scope, iv. can be administered at routine visits, v. can be administered by support staff or clinicians electronically and vi. can be used to monitor progress and outcomes<sup>[20]</sup>. In high-income countries, the use of brief assessment batteries such as the BACS have been found to meet these criteria put forward by the APA working group<sup>[21]</sup>.

1  
2  
3 Therefore, this prospective cohort study tested for associations between baseline  
4 cognitive performance using a brief cognitive battery, assessed at the initiation of  
5 antipsychotic treatment, in individuals early within their first episode of psychosis and their  
6 subsequent response to antipsychotic treatment. We hypothesised that poorer cognitive  
7 functioning at the initial assessment would be associated with poorer response over the  
8 subsequent six weeks of antipsychotic treatment.  
9  
10  
11  
12  
13  
14  
15  
16  
17  
18

## 19 **Methods**

### 20 *Design*

21  
22 The study used a prospective cohort design with a sample of patients with first-  
23 episode schizophrenia. Participants were assessed over a period of 6-weeks, with two follow-  
24 up visits following baseline and screening assessments.  
25  
26  
27  
28  
29

### 30 *Setting*

31  
32 The study was part of the ‘Schizophrenia: Treatment Resistance and Therapeutic  
33 Advances’ (STRATA) consortium which included two UK sites in this study; King’s College  
34 London (London, UK) and University of Manchester (Manchester, UK). The aim of the  
35 STRATA consortium is to identify neurobiological, cognitive, and genetic biomarkers of  
36 antipsychotic treatment resistance and non-response within schizophrenia and other related  
37 psychotic disorders.  
38  
39  
40  
41  
42  
43

### 44 *Patient and Public Involvement*

45  
46 In the early development and design of the study consultations with the NIHR  
47 Maudsley Biomedical Research Centre (BRC) Service User Advisory Group (SUAG) took  
48 place to determine the feasibility of the study and its’ assessments for service users. The  
49 NIHR Maudsley BRC Feasibility and Acceptability Support Team for Researchers (FAST-R)  
50 service was also used in order to receive feedback on consent forms, information sheets and  
51 protocols, as well as advice for recruitment strategies for service users.  
52  
53  
54  
55  
56

### 57 *Participants*

1  
2  
3  
4  
5  
6  
7  
8  
9  
10  
11  
12  
13  
14  
15  
16  
17  
18  
19  
20  
21  
22  
23  
24  
25  
26  
27  
28  
29  
30  
31  
32  
33  
34  
35  
36  
37  
38  
39  
40  
41  
42  
43  
44  
45  
46  
47  
48  
49  
50  
51  
52  
53  
54  
55  
56  
57  
58  
59  
60

89 participants aged between 18 – 65 years with a DSM-5 diagnosis of schizophrenia, schizoaffective, schizophreniform disorder, or psychosis (non-specified) (ICD-10: F20-F29) were recruited across two UK sites (King’s College London and University of Manchester). Inclusion required that participants were within the first two years of illness onset, defined using the date of first initial contact with services and clinical records. Inclusion also required that participants had received minimal antipsychotic medication, which was defined as having received antipsychotic treatment for no longer than 4 weeks prior to the baseline visit, after a period of being either antipsychotic naïve or antipsychotic-free for at least 14 days. Participants were assessed at baseline within the first 2 weeks of antipsychotic medication initiation. Participants also were required to have the capacity to provide consent and the ability to read and write in English. Participants were excluded if they met modified Andreasen remission criteria<sup>[22]</sup>, having mild or less scores on all of the following Structured Clinical Interview-Positive and Negative Syndrome Scale (SCI-PANSS)<sup>[23]</sup> items: delusions (P1), conceptual disorganisation (P2), hallucinatory behaviour (P3), blunted affect (N1), social withdrawal (N4), lack of spontaneity (N6), mannerisms/posturing (G5), unusual thought content (G9) on the day of assessment, as this would suggest that their symptoms were in remission. Participants were also required to show adherence to medication, as evidence by a Kemp Clinician Rating Scale (CRS)<sup>[24,25]</sup> of equal to or greater than 3 (“*Accepts only because compulsory, or very reluctant / requires persuasion, or questions the need for medication often*”).

Participants were assessed within the first 14 days of starting antipsychotic medication at baseline, 2-weeks from baseline assessment ( $\pm 7$  days of date) and 6-weeks from baseline assessment ( $\pm 7$  days of date), with the maximum cut-off for 6-week follow up being 56 days after baseline assessment (i.e. if an individual was assessed at the maximum follow-up periods at 2-week and 6-week visits; 8-weeks total). Participants were reimbursed for their time and expenses for participation in the study. Fourteen participants were withdrawn after providing consent, an additional 20 were withdrawn following baseline, and another 9 participants withdrawn following 2-week assessment. Participants were withdrawn if they were unable to attend the study visit, their symptoms were in remission (as per Andreasen

1  
2  
3 remission criteria<sup>[22]</sup>), or if they no longer wanted to take part in the study and requested to  
4 have their data removed (see Figure 1). 46 participants were eligible for inclusion in the  
5 analysis. All participants gave informed consent prior to enrolment. This study was approved  
6 by the Health and Social Care Research Ethics Committee A; REC: 17/NI/0209. All  
7 participants provided informed consent prior to participation.  
8  
9  
10  
11  
12

13 [Figure 1; CONSORT]  
14  
15  
16

### 17 *Definitions for treatment response status*

18  
19  
20 Treatment response groups were modelled through trajectory analyses using the *traj*  
21 command in STATA<sup>[26]</sup>. This tool estimates group-based trajectories over a specified time  
22 interval, clustering individuals who follow similar trajectories through a censored normal  
23 model. Akaike information criterion (AIC) and Bayesian information criterion (BIC) values  
24 were used to select the trajectory model with the lowest AIC and BIC values. Linear  
25 trajectories of up to five classes (1 to 5 trajectories) were assessed for eligibility. Rescaled  
26 PANSS scores<sup>[27]</sup> were calculated by subtracting 30 from total scores prior to producing  
27 estimates for percentage change at weeks 2 and 6 were used in the model. The results  
28 generated using this trajectory grouping were also compared to a more standard definition of  
29 treatment response which uses a >20% reduction in rescaled PANSS total scores from initial  
30 to final assessment<sup>[28,29]</sup>. Here patients not reaching a 20% reduction in rescaled PANSS total  
31 scores at the 6-week visits were categorised as non-responsive. These results are reported in  
32 the supplementary material.  
33  
34  
35  
36  
37  
38  
39  
40  
41  
42  
43  
44  
45

### 46 **Materials**

#### 47 *Clinical and demographic measures*

48  
49  
50 At baseline, participants completed the Kemp Clinician Rating Scale (CRS)<sup>[24,25]</sup>,  
51 Mini-international neuropsychiatric interview (MINI)<sup>[30]</sup> (M-Psychotic Disorders; A-Major  
52 Depressive Episode; D-Manic/Hypomanic/Bipolar), Structured Clinical Interview- Positive  
53 and Negative Syndrome Scale (SCI-PANSS)<sup>[23]</sup>, Clinician Rating Scale for Schizophrenia  
54 (CGI-SCH)<sup>[31]</sup> and provided demographic data. At each subsequent study visit the CRS, SCI-  
55 PANSS and CGI-SCH were repeated.  
56  
57  
58  
59  
60

### *Neuropsychological assessment*

Participants completed Version A of the Brief Assessment of Cognition in Schizophrenia (BACS)<sup>[32]</sup> at each study visit. The BACS was originally developed to assess cognitive functioning in schizophrenia, while also being an easily administrable and brief test battery<sup>[32]</sup>. The battery includes tasks pertaining to executive functions, working memory, motor/processing speed, verbal memory, verbal fluency, and attention cognitive domains. Version A includes the following tasks: i) list learning task (verbal memory); ii) digit sequencing task (working memory); iii) token motor task (motor speed); iv) category instances task (verbal fluency); v) symbol coding task (attention and speed of information processing) and vi) tower of London (executive function). All tasks on the BACS are scored such that higher scores represent better performance. Composite t and z scores for the BACS were generated using scores from published normative data<sup>[33]</sup>.

### *Data analysis*

All analyses were conducted in STATA 15/SE<sup>[34]</sup>. Wilcoxon signed rank tests were used to compare cognitive performance and symptom severity in the whole sample between visits (i.e. baseline assessment to 2-week, 2-week to 6-week, and baseline to 6-week) as not all symptom severity and cognitive variables were normally distributed. Baseline cognitive performance on the BACS was compared between trajectory groups using multivariable logistic regressions on the BACS composite and subscale scores. All models were adjusted for age, gender, and days from 1<sup>st</sup> psychotic symptom to baseline antipsychotic medication (i.e. duration of untreated psychosis; DUP). Results were then compared to groupings based on >20% reduction in rescaled PANSS total scores<sup>[27,28]</sup> from baseline assessment to 6-week follow-up (supplementary material Table S.1).

Finally, growth curve models were executed using the *xtmixed* command<sup>[35]</sup> to compare cognitive performance over time between trajectory groups to estimate any changes in cognitive performance over the study period (supplementary material Table S.2). These results were again compared to >20% PANSS reduction criteria for treatment response (supplementary material Table S.3).

## **Results**

Table 1 reports the demographic descriptive of the whole sample included in analysis (N = 46) at baseline, with PANSS symptom severity scores and BACS performance for each study visit illustrated in Table 2. Data regarding antipsychotic medication was provided by all participants at baseline, all of which were treated with 2<sup>nd</sup> generation antipsychotics. At baseline 45 participants provided PANSS symptom severity ratings, with 41 providing at least one baseline measure of the BACS (Table 2). Between baseline and 2-week assessment the average follow-up was 18.19 days (SD = 6.6) and between 2-week and 6-week this was 26.69 days (SD = 9.6). Between baseline and 6-week visit, the study trial lasted 43.86 days (SD = 7.2).

Between study visits, a significant improvement in PANSS positive symptoms scores was observed in the whole sample between baseline and 2-week visits, 2-week and 6-week visits, as well as baseline and 6-week assessments (Table 2). A significant improvement in PANSS total scores was observed between baseline and 2-week and baseline and 6-week visits. No significant differences in symptom severity were observed between visits for negative symptoms (Table 2). In the whole sample, cognitive performance on the BACS verbal memory significantly improved between baseline and 2-week visits, 2-week and 6-week visits, as well as baseline and 6-week assessments (Table 2). Verbal fluency significantly improved between baseline and 2-week visits. Symbol coding, Tower of London, and overall (t-score and z-score) performance improved significantly between baseline and 2-week visits and baseline and 6-week visits (Table 2).

Table 1

*Descriptive statistics of the whole sample demographics at consent (age) and baseline assessments*

| Variable                 | N              | M     | SD   | Min | Max |
|--------------------------|----------------|-------|------|-----|-----|
| Age (at consent)         | 46             | 27.30 | 8.17 | 18  | 50  |
| Gender ( <i>male</i> )   | 33<br>(71.74%) | -     | -    | -   | -   |
| Gender ( <i>female</i> ) | 13             | -     | -    | -   | -   |

|                                                                                                    |          |                                                                                                                                         |        |    |      |
|----------------------------------------------------------------------------------------------------|----------|-----------------------------------------------------------------------------------------------------------------------------------------|--------|----|------|
|                                                                                                    | (28.26%) |                                                                                                                                         |        |    |      |
| Age of illness onset (years)                                                                       | 46       | 26.53                                                                                                                                   | 8.45   | 18 | 49   |
| Duration from 1 <sup>st</sup> Psychotic symptom (days) to baseline antipsychotic (DUP)             | 46       | 248.30                                                                                                                                  | 245.06 | 0  | 726  |
| Duration from 1 <sup>st</sup> contact with mental health services (days) to baseline antipsychotic | 46       | 346.57                                                                                                                                  | 600.37 | 6  | 2358 |
| Chlorpromazine equivalents (mg/day)                                                                | 46       | 176.89                                                                                                                                  | 121.29 | 10 | 800  |
| Number of hospitalisations                                                                         | 46       | 0.89                                                                                                                                    | 0.64   | 0  | 3    |
| Years of education                                                                                 | 42       | 13.62                                                                                                                                   | 2.82   | 5  | 20   |
| CGI-SCH baseline score                                                                             | 56       | Minimally ill = 1<br>Mildly ill = 4<br>Moderately ill = 12<br>Markedly ill = 15<br>Severely ill = 12<br>Among the most severely ill = 1 | -      | -  | -    |
| Antipsychotic medication                                                                           | 51       | Amisulpride = 1<br>Aripiprazole = 19<br>Olanzapine = 16<br>Paliperidone = 1<br>Quetiapine = 4<br>Risperidone = 5                        | -      | -  | -    |

Note. *DUP* = Duration of untreated psychosis; *CGI-SCH* = Clinician Rating Scale for Schizophrenia.



Table 2

*Mean symptom severity as rated by the PANSS and BACS performance for the whole sample for each study visit*

| Variable              | Baseline |       |       | 2-week follow-up |       |       | 6-week follow-up |       |       | Baseline vs 2-week   | 2-week vs 6-week     | Baseline vs 6-week   |
|-----------------------|----------|-------|-------|------------------|-------|-------|------------------|-------|-------|----------------------|----------------------|----------------------|
|                       | N        | M     | SD    | N                | M     | SD    | N                | M     | SD    | Wilcoxon signed-rank | Wilcoxon signed-rank | Wilcoxon signed-rank |
| PANSS positive        | 45       | 11.93 | 4.77  | 36               | 9.17  | 5.36  | 38               | 7.26  | 5.13  | Z = 2.76, p = .006*  | Z = 2.67, p = .008*  | Z = 4.50, p < .001*  |
| PANSS negative        | 45       | 10.36 | 6.87  | 36               | 10.31 | 7.15  | 38               | 9.58  | 7.78  | Z = 0.78, p = .435   | Z = 0.62, p = .535   | Z = 1.17, p = .242   |
| PANSS general         | 45       | 19.40 | 8.57  | 36               | 16.64 | 10.60 | 38               | 15.74 | 10.11 | Z = 3.21, p = .001*  | Z = 2.48, p = .013*  | Z = 0.64, p = .524   |
| PANSS total           | 45       | 41.69 | 16.11 | 36               | 36.11 | 20.03 | 38               | 32.58 | 20.04 | Z = 3.10, p = .002*  | Z = 1.46, p = .144   | Z = 3.35, p < .001*  |
| BACS Verbal memory    | 41       | 37.83 | 14.02 | 32               | 41.16 | 13.50 | 36               | 44.56 | 15.02 | Z = -3.14, p = .002* | Z = -3.15, p = .002* | Z = -3.88, p < .001* |
| BACS Digit sequencing | 38       | 18.03 | 4.06  | 32               | 17.84 | 4.33  | 34               | 17.85 | 4.69  | Z = -0.78, p = .433  | Z = -0.40, p = .688  | Z = 0.40, p = .687   |
| BACS Verbal fluency   | 42       | 28.60 | 7.85  | 31               | 31.87 | 9.47  | 35               | 30.20 | 8.38  | Z = -1.96, p = .050* | Z = 0.83, p = .405   | Z = -1.62, p = .105  |
| BACS Token motor      | 39       | 65.36 | 10.83 | 32               | 65.56 | 17.81 | 34               | 61.38 | 20.94 | Z = -1.30, p = .193  | Z = -0.55, p = .583  | Z = -0.24, p = .812  |
| BACS Symbol coding    | 39       | 40.15 | 13.13 | 32               | 45.69 | 12.56 | 32               | 47.25 | 11.96 | Z = -2.25, p = .025* | Z = -1.07, p = .284  | Z = -3.29, p = .001* |

|              |    |       |       |    |       |       |    |       |       |                         |                       |                         |
|--------------|----|-------|-------|----|-------|-------|----|-------|-------|-------------------------|-----------------------|-------------------------|
| BACS ToL     | 37 | 14.84 | 4.48  | 29 | 17.38 | 3.29  | 32 | 16.28 | 4.13  | $Z = -3.24, p = .001^*$ | $Z = 1.45, p = .148$  | $Z = -2.42, p = .016^*$ |
| BACS t-score | 33 | 26.67 | 11.98 | 28 | 34.14 | 11.68 | 30 | 30.87 | 14.95 | $Z = -3.79, p < .001^*$ | $Z = -0.29, p = .769$ | $Z = -3.66, p < .001^*$ |
| BACS z-score | 33 | -2.34 | 1.19  | 28 | -1.59 | 1.17  | 30 | -1.91 | 1.50  | $Z = -3.85, p < .001^*$ | $Z = -0.23, p = .820$ | $Z = -3.67, p < .001^*$ |

Note. *PANSS* = Positive and Negative Symptom Scale; *BACS* = Brief Assessment of Cognition in Schizophrenia; *ToL* = Tower of London.  
 \* = significant at  $p = .05$  level.

### Trajectories of symptom change

BIC and AIC values were generated for five classes of trajectory models (Table 3). Of these both indices indicate that the two-trajectory group is best fitted to the data. This model estimated 73.7% of the sampled population to be from one linear trajectory, with the remaining 26.3% in another.

Table 3  
Selecting a trajectory model using BIC and AIC estimates

| No. of classes  | 1       | 2             | 3                     | 4                             | 5                                  |
|-----------------|---------|---------------|-----------------------|-------------------------------|------------------------------------|
| BIC             | -522.21 | -512.13       | -517.87               | -520.14                       | -525.88                            |
| AIC             | -519.46 | -506.64       | -509.64               | -509.17                       | -512.17                            |
| % in each class | 100%    | 73.7% ; 26.3% | 73.7% ; 26.3% ;<br>0% | 60.7% ; 23.7% ;<br>15.6% ; 0% | 60.7% ; 23.7% ;<br>15.6% ; 0% ; 0% |

Note. *BIC* = Bayesian Information Criteria; *AIC* = Akaike's Information Criteria.

The trajectories identified by the *traj* procedure are shown in Figure 2. The trajectories that emerged clearly represented responders versus non-responders. 39 participants (84.78%) of the sample were classified as antipsychotic treatment responsive and 7 as treatment non-responsive (15.22%). For responders, PANSS total score percentage change at 6 weeks was on average 32.89% (SD = 27.5) for symptom improvement. For non-responders this was -21.03% (SD = 16.1) indicating a decline in symptom improvement. Shape estimates and standard errors of antipsychotic response are shown in Table 4. Treatment responders significantly improved over the 6-week period. Descriptive statistics of clinical and demographic variables between both trajectory groups (non-responder; responder) are presented in the supplementary material (Table S.4.) In comparison to those responsive to antipsychotic medication, non-responders were on average older, had a longer duration of time from first contact with mental health services to baseline antipsychotic medication, had marginally more hospitalisations, attained more years of education, and were treated at higher chlorpromazine equivalents (supplementary material Table S.4).

[Figure 2]

Table 4

Parameter estimates and standard errors for both trajectories of antipsychotic response

| Parameters     | Trajectories          |                    |
|----------------|-----------------------|--------------------|
|                | Non-responder (N = 7) | Responder (N = 39) |
| Intercept      | 2.54                  | -3.71              |
| Linear change  | 0.10                  | -0.54              |
| Standard error | 0.06                  | 0.09               |
| T statistic    | 1.61, $p = .111$      | -6.06, $p < .001$  |

*Cognitive performance*

There was a significant improvement in BACS verbal memory and symbol coding performance between baseline and 6-week assessments across the whole sample, with a significant improvement in Tower of London and BACS z and t composite scores between baseline and 2-week visits (Table 2). At baseline assessment, there was no difference in the BACS subscale or composite scores between antipsychotic responders and non-responders identified in the trajectory analysis (Table 5; Table 6). Growth curve models observed no significant change in cognitive performance over follow-up visits between trajectory groups (supplementary material Figure S.1, Table S.2). A similar pattern in results was observed when >20% PANSS reduction criteria was applied (supplementary material Figure S.2, Table S.3, Table S.5).

Table 5  
*Baseline cognitive performance for both trajectory groups*

| BACS measure     | Non-responder |       |       | Responder |       |       |
|------------------|---------------|-------|-------|-----------|-------|-------|
|                  | N             | Mean  | SD    | N         | Mean  | SD    |
| Verbal Memory    | 7             | 37.29 | 9.48  | 34        | 37.94 | 14.89 |
| Digit Sequencing | 6             | 20.17 | 5.38  | 32        | 17.63 | 3.74  |
| Verbal Fluency   | 7             | 30.29 | 7.30  | 35        | 28.26 | 8.01  |
| Token Motor      | 7             | 66.86 | 8.93  | 32        | 65.03 | 11.30 |
| Symbol Coding    | 6             | 47.50 | 6.35  | 33        | 38.82 | 13.66 |
| Tower of London  | 7             | 14.71 | 3.77  | 30        | 14.87 | 4.69  |
| tscore composite | 6             | 28.83 | 14.36 | 27        | 26.19 | 11.65 |
| zscore composite | 6             | -2.12 | 1.41  | 27        | -2.39 | 1.16  |

Note. *BACS* =Brief Assessment of Cognition in Schizophrenia.

#### *Multivariable linear regression*

Univariable and multivariable logistic regression models adjusting for age and gender and duration of untreated psychosis (DUP) found no significant associations between BACS performance at baseline and response trajectory over 6 weeks (Table 6), with no association of any demographic or clinical variables in multivariable models. This was also observed when utilising the >20% reduction in PANSS total criteria (supplementary material Table S.4).

Table 6

Results from univariable and multivariable logistic regression models for response status and baseline BACS performance

| BACS task         | Unadjusted |      |              |      |         | Adjusted for age, gender, and DUP |      |              |      |         |
|-------------------|------------|------|--------------|------|---------|-----------------------------------|------|--------------|------|---------|
|                   | $\beta$    | SE   | 95%CI        | OR   | P-value | $\beta$                           | SE   | 95%CI        | OR   | P-value |
| Verbal Memory     | <0.01      | 0.03 | -0.06 ; 0.06 | 1.00 | .909    | <-0.01                            | 0.03 | -0.07 ; 0.06 | 1.00 | .918    |
| Digit Sequencing  | -0.17      | 0.12 | -0.41 ; 0.07 | 0.84 | .168    | -0.18                             | 0.13 | -0.44 ; 0.07 | 0.83 | .151    |
| Verbal Fluency    | -0.03      | 0.05 | -0.14 ; 0.07 | 0.97 | .530    | -0.05                             | 0.06 | -0.17 ; 0.07 | 0.95 | .417    |
| Token Motor       | -0.02      | 0.04 | -0.09 ; 0.06 | 0.98 | .683    | -0.02                             | 0.05 | -0.11 ; 0.08 | 0.99 | .737    |
| Symbol Coding     | -0.06      | 0.04 | -0.14 ; 0.02 | 0.94 | .145    | -0.07                             | 0.05 | -0.16 ; 0.02 | 0.93 | .114    |
| Tower of London   | 0.08       | 0.09 | -0.18 ; 0.19 | 1.01 | .935    | -0.01                             | 0.10 | -0.20 ; 0.19 | 0.99 | .947    |
| t score composite | -0.02      | 0.04 | -0.10 ; 0.06 | 0.98 | .620    | -0.02                             | 0.04 | -0.10 ; 0.06 | 0.98 | .594    |
| z score composite | -0.21      | 0.40 | -0.99 ; 0.58 | 0.81 | .603    | -0.23                             | 0.41 | -1.02 ; 0.57 | 0.80 | .573    |

Note. BACS = Brief Assessment of Cognition in Schizophrenia; CIs = confidence intervals; DUP = duration of untreated psychosis.

1  
2  
3  
4  
5  
6  
7  
8  
9  
10  
11  
12  
13  
14  
15  
16  
17  
18  
19  
20  
21  
22  
23  
24  
25  
26  
27  
28  
29  
30  
31  
32  
33  
34  
35  
36  
37  
38  
39  
40  
41  
42  
43  
44  
45  
46

For peer review only

## Discussion

This prospective study investigated the relationship between baseline cognitive performance and subsequent antipsychotic response over a 6-week treatment period. Across the whole sample, participants showed an overall reduction in symptom severity as well as an improvement in cognitive performance on the majority of BACS tasks. Trajectory analyses estimated two trajectory groups (73.7%, 26.3%) based on PANSS total % change from baseline; this was reflected as 84.78% of the sample being grouped as treatment responsive, and the remaining 15.22% as treatment non-responsive. Contrary to our hypothesis, baseline cognitive performance did not significantly differ between those identified as treatment responders or non-responders following 6 weeks of antipsychotic treatment. This finding remained the same when treatment response was defined as at least a 20% reduction in PANSS total scores, suggesting that there is no association between cognitive performance and antipsychotic response in first episode schizophrenia.

Across the 2-week and 6-week follow-up visits, an improvement in cognitive performance was observed for the whole sample on BACS measures of verbal memory, verbal fluency, symbol coding and Tower of London tasks, as well as the BACS composite scores. Most of these changes occurred between baseline and 2-week assessment (Table 2), with small decreases in performance on measures of verbal fluency, token motor and Tower of London tasks between 2-week and 6-week assessments, as well as for composite z and t scores. In contrast, there was a decline in performance in the token motor task across the follow-up period, and minimal changes in performance in the digit sequencing task.

The observed improvement in cognitive performance may reflect a beneficial outcome of antipsychotic treatment. 1<sup>st</sup> generation antipsychotics, introduced in the 1950s, target the positive symptoms observed in schizophrenia by acting as an antagonist at dopamine D2 receptors. Treatment with this group of antipsychotic drugs has been associated with motor and cognitive deficits in patients<sup>[36,37]</sup>. In contrast, 2<sup>nd</sup> generation antipsychotics are reported to have fewer extrapyramidal side effects<sup>[38]</sup>, with these drugs also acting as an antagonist at the serotonin 5HT2A receptor, in addition to D2 dopamine receptors. Research suggests that in comparison to 1<sup>st</sup> generation, 2<sup>nd</sup> generation antipsychotics can provide some improvement in cognitive performance (e.g. clozapine<sup>[39]</sup>). Guilera et al (2009)<sup>[40]</sup> found in their meta-analysis of 18 randomised controlled trials that 2<sup>nd</sup> generation drugs provided a



1  
2  
3 slight improvement in performance for global cognition, as well as slight but significant  
4 improvements in measures of procedural learning, language and verbal comprehension,  
5 verbal learning and memory and visual learning and memory.  
6  
7  
8  
9

10 As the whole study sample was treated with 2<sup>nd</sup> generation antipsychotic drugs at  
11 baseline assessment (Amisulpride = 1, Aripiprazole = 19, Olanzapine = 16, Paliperidone = 1,  
12 Quetiapine = 4 and Risperidone = 5), it is possible that the improvement in cognitive  
13 performance observed in our sample may be a result of 2<sup>nd</sup> antipsychotic treatment effects,  
14 although 1<sup>st</sup> generation antipsychotic use could not be compared. However it has also been  
15 argued that improvements in cognitive performance over longitudinal designs may instead  
16 reflect practice effects (e.g. familiarity and procedural learning<sup>[41]</sup>), meaning that  
17 improvement in cognitive performance in our sample could also be attributable to practice  
18 effects between study visits. Lees et al<sup>[42]</sup> estimated the magnitude of these effects using both  
19 the MATRICS Consensus Cognitive Battery (MCCB)<sup>[43]</sup> and the Cog State Schizophrenia  
20 Battery<sup>[44]</sup>, finding strong test-retest correlations between repeated baseline visits across  
21 cognitive batteries, with potential learning effects in social-emotional cognition. However,  
22 the authors also observed that participants may have failed to complete the initial baseline  
23 assessment due to difficulty in understanding the task, with the suggestion that future  
24 investigations using either battery would benefit from adopting initial practice sessions to  
25 reduce practice effects. Therefore an initial practice session with the BACS may have  
26 reduced the size of improvement observed in cognitive performance from baseline  
27 performance. Another way to determine the extent of practice effects in our sample would be  
28 to have a control group who is already stable on antipsychotic medication to see if similar  
29 outcomes are observed between groups.  
30  
31  
32  
33  
34  
35  
36  
37  
38  
39  
40  
41  
42  
43  
44  
45

46 Despite all of the sample being treated with 2<sup>nd</sup> generation antipsychotics, it is also  
47 possible that some anticholinergic effects, which differ between 2<sup>nd</sup> generation antipsychotic  
48 drugs<sup>[45]</sup>, may have affected cognitive performance. Long term exposure to antipsychotic  
49 medications of high anticholinergic activity have been previously reported to impact  
50 cognitive performance in patient samples<sup>[46,47,48]</sup>. Using low and high anticholinergic activity  
51 criteria from a recent review comparing medication effects (from Stroup & Gray<sup>[49]</sup>; refer to  
52 Table 1, pg. 342), our sample had 44% (N = 20) treated with a high anticholinergic  
53 antipsychotic, meaning that the absence of significant differences between groups may have  
54 been a result of heterogeneity in medication effects. Therefore, future investigations should  
55  
56  
57  
58  
59  
60

1  
2  
3 consider the role of antipsychotic treatment effects on cognitive outcomes within  
4 schizophrenia.  
5  
6  
7

8 Trajectory analyses identified two clearly defined trajectories of treatment response,  
9 both of which are consistent across both timepoints: one trajectory showing good response,  
10 and one of little to no response (Figure 2). Confidence intervals (Figure 2) show some  
11 overlap between trajectories in the first ~20 days since baseline assessment, with these  
12 becoming independent following this period, meaning that separation between trajectory  
13 groups was apparent at around 3 weeks. This supports the findings from Samara et al<sup>6</sup> who  
14 found poor/minimal response to antipsychotic treatment at 2-weeks to be predictive of future  
15 treatment non-response. In previous investigations using first episode samples, 4 or more  
16 trajectories have been identified<sup>[50,51]</sup>. However, both these investigations used longer periods  
17 of follow-up as well as raw un-adjusted PANSS scores in their analyses: as the minimum raw  
18 score of the PANSS is 30, it is recommended to rescale the scores by subtracting 30 from  
19 total scores prior to producing percentages and ratios<sup>[52]</sup>. Therefore building trajectory models  
20 using raw scores may not be appropriate to use as ratio operations (e.g. calculating  
21 proportions and percentages) require a natural zero point<sup>[52]</sup>.  
22  
23  
24  
25  
26  
27  
28  
29  
30  
31  
32  
33

34 Growth curve models which were used to quantify change in cognitive performance  
35 between trajectory groups observed no significant changes in performance between visits. It  
36 is possible that this may be due to under sampled groups, as significant improvements for  
37 verbal memory, symbol coding, Tower of London and composite scores were observed in the  
38 whole sample. When comparing our findings to a >20% reduction in rescaled PANSS total  
39 scores criteria<sup>[24,25]</sup> there were no changes in the pattern of results to growth curve models or  
40 logistic regression outcomes. Using this criterion for treatment response resulted in a more  
41 even distribution of the total sample to groups (responder = 17 ; non-responder = 21),  
42 providing more power to comparative analyses. However despite this there was no change in  
43 the pattern of results, meaning that this criterion provided no added benefit to this analysis  
44 over trajectory-based groupings. The lack of significant difference in baseline cognition  
45 between those classified as treatment responders or non-responders after 6 weeks of  
46 treatment in our study contrasts previous research conducted which observed impaired  
47 cognitive performance in the poor response trajectory at week 4, with good performance at  
48 baseline being predictive of a good response trajectory at week 4<sup>[51]</sup>. Likewise, longitudinal  
49 research using the MCCB<sup>[43]</sup> with first-episode schizophrenia patients assessed at baseline  
50  
51  
52  
53  
54  
55  
56  
57  
58  
59  
60

1  
2  
3 and at a 12-week follow up identified tasks of executive function and planning and reasoning  
4 ability as potential indices of antipsychotic response<sup>[53]</sup>, with similar findings observed when  
5 cognitive performance is correlated with symptom severity measures<sup>[54]</sup>.  
6  
7  
8

### 9 10 *Limitations*

11 Previous investigations included sample sizes several magnitudes higher than in our  
12 study (Levine & Rabinowitz<sup>[51]</sup>; N = 491; Trampush et al<sup>[53]</sup>; N = 175) and it is likely that our  
13 sample size limited our ability to observe a significant relationship between cognitive  
14 performance and antipsychotic response. Using our sample's mean values for the BACS t  
15 composite score, a power calculation found that a total sample size of 31,304 samples would  
16 be required to detect a significant difference between trajectory groups at 90% power. When  
17 using the >20% PANSS reduction criteria this was N = 6,118, suggesting that both analyses  
18 were underpowered due to under sampling.  
19  
20  
21  
22  
23  
24  
25

26 Another considerable limitation of the conclusions from this investigation is the  
27 expectation of detecting meaningful change in both clinical response to medication and  
28 cognition in such a short duration of follow-up. Previous longitudinal investigations into  
29 cognitive change have noted that even a period of 1 to 3 years may not be substantial to  
30 detect changes in cognitive performance<sup>[55]</sup>, questioning the additional analyses in this study  
31 comparing performance between baseline and 2-week and 6-week study visits. Likewise,  
32 Emsley et al's<sup>[56]</sup> investigation with 522 participants with first episode schizophrenia found  
33 11.2% of their sample to not achieve clinical response (determined by a 20% improvement in  
34 PANSS total scores) until after 8 weeks, with the authors concluding that antipsychotic  
35 response is greatly varied and that longer investigations are needed to capture the large  
36 variability in clinical response<sup>[56]</sup>. Therefore it is also possible that there are participants  
37 within the sample who may have later responded to medication if the follow-up was at a  
38 longer duration, which may also partially support the lack of significant differences between  
39 groups in this study. Likewise, adopting secondary criteria for treatment response and non-  
40 response based off criteria from the TRIPP Working Group<sup>[57]</sup> would also help in seeing  
41 whether the groupings identified by trajectory analyses correspond to standardised guidelines,  
42 aiding in comparison between investigations.  
43  
44  
45  
46  
47  
48  
49  
50  
51  
52  
53  
54  
55  
56  
57

58 Due to the issues with small sample sizes, it was not possible to adjust for additional  
59 variables which may be associated with cognitive performance. Negative symptoms have  
60

1  
2  
3 routinely been associated with cognitive performance<sup>[58,59]</sup>, including performance on the  
4 BACS<sup>[60]</sup>. Medication effects such as higher antipsychotic doses<sup>[61,62]</sup> and high  
5 anticholinergic antipsychotics<sup>[46,47,48]</sup>, have also been associated with deficits in cognitive  
6 performance. Future research should measure and adjust for these variables in order to  
7 determine the true association between cognition and treatment response without potential  
8 confounders.  
9

10  
11  
12  
13  
14  
15 It is also possible that premorbid histories of the sample may have resulted in a less  
16 consistent picture of cognitive performance between groups. For example, prior cannabis use,  
17 particularly during adolescence, has been found to improve cognitive performance on the  
18 BACS in comparison to those who haven't ever used cannabis<sup>[63]</sup>. In this investigation  
19 comparing performance on the BACS between patients with a schizophrenia diagnosis with  
20 and without adolescent cannabis use (ACU), those with ACU reported significantly higher  
21 composite scores, as well significant improvement in working memory and verbal memory  
22 tasks<sup>[63]</sup>. In our sample, 68% (N = 30) had previous experience of using cannabis, with the  
23 majority of this use occurring between ages 12-19 (N = 23). Therefore, it is possible that  
24 premorbid histories may have also blurred the cognitive differences between groups.  
25  
26  
27  
28  
29  
30  
31  
32  
33  
34

### 35 **Conclusions**

36  
37  
38 In this prospective cohort study, patients with a first episode diagnosis were assessed  
39 three times over a period of 6 weeks. Trajectory analyses using percentage change in PANSS  
40 total symptom scores identified two groups reflecting a good and poor response to  
41 antipsychotic medication. Baseline cognitive performance of these two groups did not predict  
42 response status at 6-weeks. This lack of discrimination between groups is potentially  
43 attributable to underpowered analyses as a result of small sample sizes but may also evidence  
44 that an association between cognition and treatment response is not observable in the first  
45 episode of schizophrenia. Overall this suggests that brief cognitive batteries for schizophrenia  
46 may not be a useful predictor of antipsychotic response in the first two-years of illness onset.  
47  
48  
49  
50  
51  
52  
53  
54  
55  
56  
57  
58  
59  
60

1  
2  
3  
4  
5  
6  
7  
*Contributorship:*

8 J.H.M., A.E., B.D., R.J.D., O.D.H., L.K., C.C., A.S., R.O., S.Le., J.L., S.La., S.K., and E.Mik  
9 contributed to the design and implementation of the study. E.O., E.M., R.P., N.R., K.G., C.C.,  
10 S.E.S., and K.V.S. aided in data collection. E.M. completed analyses and wrote the  
11 manuscript with the assistance of J.H.M. K.G., N.R., J.H.M., A.E., E.K., R.J.D., A.S., C.C.,  
12 B.D., provided comments on the manuscript.  
13  
14  
15

16  
17  
*Funding statement:*

18 STRATA is funded by a grant from the Medical Research Council (MRC) to JHM, grant  
19 reference MR/L011794. EM's PhD is funded by the MRC-doctoral training partnership studentship  
20 in Biomedical Sciences at King's College London. J.H.M., E.K., A.E., O.D.H. are part funded by  
21 the National Institute for Health Research (NIHR) Biomedical Research Centre at South  
22 London and Maudsley NHS Foundation Trust and King's College London. The views  
23 expressed are those of the authors and not necessarily those of the NHS, the MRC, the NIHR  
24 or the Department of Health.  
25  
26  
27

28  
29  
*Competing of Interests:*

30  
31 The remaining authors report no conflicts of interest.  
32  
33

34  
35  
*Ethics approval:*

36  
37 This study was approved by the Health and Social Care Research Ethics Committee A; REC:  
38 17/NI/0209.  
39  
40

41  
42  
*Data sharing:*

43  
44 At the time of submission, the data governance frameworks are being put in place to make a  
45 fully anonymized version of the data available to the wider research community via the  
46 TransSMART data sharing platform: <https://transmartfoundation.org/>. To apply for access to  
47 the data, please contact J.H.M. at [james.maccabe@kcl.ac.uk](mailto:james.maccabe@kcl.ac.uk).  
48  
49  
50  
51  
52  
53  
54  
55  
56  
57  
58  
59  
60

## References

- 1  
2  
3  
4  
5  
6  
7 [1] McGlashan TH, Johannessen, JO. Early detection and intervention with schizophrenia:  
8 rationale. *Schizophrenia bulletin* 1996;22(2),201-222.
- 9  
10 [2] Birchwood M, McGorry P, Jackson H. Early intervention in schizophrenia. *The British Journal*  
11 *of Psychiatry* 1997;170(1),2-5.
- 12  
13 [3] Bond GR, Drake RE, Luciano A. Employment and educational outcomes in early intervention  
14 programmes for early psychosis: a systematic review. *Epidemiology and psychiatric sciences*  
15 2015; 24(5),446-457.
- 16  
17 [4] Bozzatello P, Bellino S, Rocca P. Predictive factors of treatment resistance in first episode of  
18 psychosis: A systematic review. *Frontiers in psychiatry* 2019;10, 67.
- 19  
20 [5] Carbon, M, Correll CU. Clinical predictors of therapeutic response to antipsychotics in  
21 schizophrenia. *Dialogues in clinical neuroscience* 2014;16(4), 505.
- 22  
23 [6] Samara, MT, Leucht C, Leeflang M, et al. Early improvement as a predictor of later response to  
24 antipsychotics in schizophrenia: a diagnostic test review. *American journal of psychiatry*  
25 2015;172(7),617-629.
- 26  
27 [7] Griffiths K, Millgate E, Egerton A, et al. Demographic and clinical variables associated with  
28 response to clozapine in schizophrenia: a systematic review and meta-analysis. *Psychological*  
29 *Medicine* 2021;1-11.
- 30  
31 [8] Yoshimura B, Yada Y, So R, et al. The critical treatment window of clozapine in treatment-  
32 resistant schizophrenia: secondary analysis of an observational study. *Psychiatry research*  
33 2017;250,65-70.
- 34  
35 [9] Kennedy JL, Altar CA, Taylor DL, et al. The social and economic burden of treatment-resistant  
36 schizophrenia: a systematic literature review. *International clinical psychopharmacology*  
37 2014;1;29(2):63-76.
- 38  
39 [10] McCrone P, Dhanasiri S, Patel A, et al. The cost of mental health care in England to 2026. *The*  
40 *King's Fund* 2008;1-65.
- 41  
42 [11] National Institute for Health and Care Excellence. Psychosis and schizophrenia in adults:  
43 prevention and management. *NICE*; 2014.
- 44  
45 [12] Tsiachristas A, Thomas T, Leal J, et al. Economic impact of early intervention in psychosis  
46 services: results from a longitudinal retrospective controlled study in England. *BMJ open*  
47 2016;1;6(10):e012611.
- 48  
49  
50  
51  
52  
53  
54  
55  
56  
57  
58  
59  
60



- 1  
2  
3  
4  
5  
6 [13] Reichenberg A, Caspi A, Harrington H, et al. Static and dynamic cognitive deficits in childhood  
7 preceding adult schizophrenia: a 30-year study. *American Journal of Psychiatry*  
8 2010;167(2),160-169.  
9  
10  
11 [14] MacCabe JH, Wicks S, Löfving S, et al. Decline in cognitive performance between ages 13 and  
12 18 years and the risk for psychosis in adulthood: a Swedish longitudinal cohort study in  
13 males. *Jama Psychiatry* 2013;70(3),261-270.  
14  
15  
16 [15] Green MF, Kern RS, Heaton RK. Longitudinal studies of cognition and functional outcome in  
17 schizophrenia: implications for MATRICS. *Schizophrenia research* 2004;72(1),41-51.  
18  
19  
20 [16] Carrión RE, Goldberg TE, McLaughlin D, et al. Impact of neurocognition on social and role  
21 functioning in individuals at clinical high risk for psychosis. *American Journal of Psychiatry*  
22 2011;168(8),806-813.  
23  
24  
25 [17] Horan WP, Green MF, DeGroot M, et al. Social cognition in schizophrenia, part 2: 12-month  
26 stability and prediction of functional outcome in first-episode patients. *Schizophrenia bulletin*  
27 2012;38(4),865-872.  
28  
29  
30 [18] Millgate E, Hide O, Lawrie SM, et al. Neuropsychological differences between treatment-  
31 resistant and treatment-responsive schizophrenia: a meta-analysis. *Psychological medicine*  
32 2022;52(1),1-13.  
33  
34  
35 [19] American Psychological Association. Distinguishing between screening and assessment for  
36 mental and behavioral health problems. 2014.  
37  
38  
39 [20] Roebuck-Spencer TM, Glen T, Puente AE, et al. Cognitive screening tests versus  
40 comprehensive neuropsychological test batteries: a national academy of neuropsychology  
41 education paper. *Archives of Clinical Neuropsychology* 2017 Jun 1;32(4):491-8.  
42  
43  
44 [21] Hurford IM, Marder SR, Keefe RS, et al. A brief cognitive assessment tool for schizophrenia:  
45 construction of a tool for clinicians. *Schizophrenia Bulletin* 2011 May 1;37(3):538-45.  
46  
47  
48 [22] Andreasen NC, Carpenter Jr WT, Kane JM, et al. Remission in schizophrenia: proposed criteria  
49 and rationale for consensus. *American Journal of Psychiatry* 2005;162(3),441-449.  
50  
51  
52 [23] Kay SR, Fiszbein A, Opler LA. The positive and negative syndrome scale (PANSS) for  
53 schizophrenia. *Schizophrenia bulletin* 1987;13(2),261-276.  
54  
55  
56 [24] Kemp R, Hayward P, Applewhaite G, et al. Compliance therapy in psychotic patients:  
57 randomised controlled trial. *Bmj* 1996;312(7027),345-349.  
58  
59  
60 [25] Kemp R, Kirov G, Everitt B, et al. Randomised controlled trial of compliance therapy: 18-  
month follow-up. *The British Journal of Psychiatry* 1998;172(5),413-419.

- 1  
2  
3 [26] Jones BL, Nagin DS. A note on a Stata plugin for estimating group-based trajectory  
4 models. *Sociological Methods & Research* 2013;42(4),608-613.  
5  
6 [27] Leucht S, Kissling W, Davis JM. The PANSS should be rescaled. *Schizophrenia bulletin*  
7 2010;36(3),461-462.  
8  
9 [28] Leucht S, Kane JM, Kissling W, et al. What does the PANSS mean?. *Schizophrenia research*  
10 2005;79(2-3),231-238.  
11  
12 [29] Leucht S, Davis JM, Engel RR, et al. Definitions of response and remission in schizophrenia:  
13 recommendations for their use and their presentation. *Acta Psychiatrica Scandinavica*  
14 2009;119,7-14.  
15  
16 [30] Sheehan DV, Lecrubier Y, Sheehan KH, et al. The Mini-International Neuropsychiatric  
17 Interview (MINI): the development and validation of a structured diagnostic psychiatric  
18 interview for DSM-IV and ICD-10. *The Journal of clinical psychiatry* 1998.  
19  
20 [31] Guy W. ECDEU assessment manual for psychopharmacology. *US Department of Health,*  
21 *Education, and Welfare, Public Health Service, Alcohol, Drug Abuse, and Mental Health*  
22 *Administration, National Institute of Mental Health, Psychopharmacology Research Branch,*  
23 *Division of Extramural Research Programs* 1976.  
24  
25 [32] Keefe RS, Goldberg TE, Harvey PD, et al. The Brief Assessment of Cognition in  
26 Schizophrenia: reliability, sensitivity, and comparison with a standard neurocognitive  
27 battery. *Schizophrenia research* 2004;68(2-3),283-297.  
28  
29 [33] Keefe RS, Harvey PD, Goldberg TE, et al. Norms and standardization of the Brief Assessment  
30 of Cognition in Schizophrenia (BACS). *Schizophrenia research* 2008;102(1-3),108-115.  
31  
32 [34] StataCorp. Stata Statistical Software: Release 15. 2017. College Station, TX: StataCorp LLC.  
33  
34 [35] StataCorp, LP. Stata multilevel mixed-effects reference manual. 2013. College Station, TX:  
35 StataCorp LP, 9(10).  
36  
37 [36] Kapur S, Zipursky R, Jones C, et al. Relationship between dopamine D2 occupancy, clinical  
38 response, and side effects: a double-blind PET study of first-episode schizophrenia. *American*  
39 *Journal of Psychiatry* 2000;157(4),514-520.  
40  
41 [37] Reilly JL, Harris MS, Keshavan MS, et al. Adverse effects of risperidone on spatial working  
42 memory in first-episode schizophrenia. *Archives of general psychiatry* 2006;63(11),1189-  
43 1197.  
44  
45 [38] Hill SK, Bishop JR, Palumbo D, et al. Effect of second-generation antipsychotics on cognition:  
46 current issues and future challenges. *Expert review of neurotherapeutics* 2010;10(1),43-57.  
47  
48  
49  
50  
51  
52  
53  
54  
55  
56  
57  
58  
59  
60



- 1  
2  
3 [39] Kane J, Honigfeld G, Singer J, et al. Clozapine for the treatment-resistant schizophrenic: a  
4 double-blind comparison with chlorpromazine. *Archives of general psychiatry*  
5 1988;45(9),789-796.  
6  
7  
8 [40] Guilera G, Pino O, Gómez-Benito J, et al. Antipsychotic effects on cognition in schizophrenia: a  
9 meta-analysis of randomised controlled trials. *The European Journal of Psychiatry*  
10 2009;23(2),77-89.  
11  
12  
13 [41] Goldberg TE, Goldman RS, Burdick KE, et al. Cognitive improvement after treatment with  
14 second-generation antipsychotic medications in first-episode schizophrenia: is it a practice  
15 effect?. *Archives of general psychiatry* 2007;64(10),1115-1122.  
16  
17  
18 [42] Lees J, Applegate E, Emsley R, et al. Calibration and cross-validation of MCCB and CogState  
19 in schizophrenia. *Psychopharmacology* 2015;232(21),3873-3882.  
20  
21  
22 [43] Nuechterlein KH, Green MF, Kern RS, et al. The MATRICS Consensus Cognitive Battery, part  
23 1: test selection, reliability, and validity. *American Journal of Psychiatry* 2008;165(2),203-  
24 213.  
25  
26  
27 [44] Maruff P, Thomas E, Cysique L, et al. Validity of the CogState brief battery: relationship to  
28 standardized tests and sensitivity to cognitive impairment in mild traumatic brain injury,  
29 schizophrenia, and AIDS dementia complex. *Archives of Clinical Neuropsychology*  
30 2009;24(2),165-178.  
31  
32  
33 [45] Lieberman JA. Managing anticholinergic side effects. *Primary care companion to the Journal*  
34 *of clinical psychiatry* 2004;6(suppl2),20.  
35  
36  
37 [46] Strauss ME, Reynolds KS, Jayaram G, et al. Effects of anticholinergic medication on memory in  
38 schizophrenia. *Schizophrenia Research* 1990;3(2),127-129.  
39  
40  
41 [47] Campbell N, Boustani M, Limbil T, et al. The cognitive impact of anticholinergics: a clinical  
42 review. *Clinical interventions in aging* 2009;4,225.  
43  
44  
45 [48] Joshi YB, Thomas ML, Braff DL, et al. Anticholinergic Medication Burden–Associated  
46 Cognitive Impairment in Schizophrenia. *American Journal of Psychiatry* 2021;appi-ajp.  
47  
48 [49] Stroup TS, Gray N. Management of common adverse effects of antipsychotic  
49 medications. *World Psychiatry* 2018;17(3),341-356.  
50  
51  
52 [50] Abdin E, Chong SA, Vaingankar JA, et al. Trajectories of positive, negative and general  
53 psychopathology symptoms in first episode psychosis and their relationship with functioning  
54 over a 2-year follow-up period. *PloS one* 2017;12(11),e0187141.  
55  
56  
57 [51] Levine SZ, Rabinowitz J. Trajectories and antecedents of treatment response over time in early-  
58 episode psychosis. *Schizophrenia bulletin* 2010;36(3),624-632.  
59  
60

- 1  
2  
3 [52] Obermeier M, Mayr A, Schennach-Wolff R, et al. Should the PANSS be  
4 rescaled?. *Schizophrenia bulletin* 2010;36(3),455-460.  
5  
6 [53] Trampush JW, Lencz T, DeRosse P, et al. Relationship of cognition to clinical response in first-  
7 episode schizophrenia spectrum disorders. *Schizophrenia bulletin* 2015;41(6),1237-1247.  
8  
9 [54] Bilder RM, Goldman RS, Robinson D, et al. Neuropsychology of first-episode schizophrenia:  
10 initial characterization and clinical correlates. *American Journal of Psychiatry*  
11 2000;157(4),549-559.  
12  
13 [55] Zanelli J, Mollon J, Sandin S, et al. Cognitive change in schizophrenia and other psychoses in  
14 the decade following the first episode. *American Journal of Psychiatry* 2019 Oct  
15 1;176(10):811-9.  
16  
17 [56] Emsley R, Rabinowitz J, Medori R. Time course for antipsychotic treatment response in first-  
18 episode schizophrenia. *American Journal of Psychiatry* 2006 Apr;163(4):743-5.  
19  
20 [57] Howes OD, McCutcheon R, Agid O, et al. Treatment-resistant schizophrenia: treatment  
21 response and resistance in psychosis (TRRIP) working group consensus guidelines on  
22 diagnosis and terminology. *American Journal of Psychiatry* 2017 Mar 1;174(3):216-29.  
23  
24 [58] Addington J, Addington D, Maticka-Tyndale E. Cognitive functioning and positive and negative  
25 symptoms in schizophrenia. *Schizophrenia research* 1991 Sep 1;5(2):123-34.  
26  
27 [59] Hoffman RE, Rakfeldt J. Cognition, negative symptoms, and diagnosis: a comparison of  
28 schizophrenic, bipolar, and control samples. *Neurosciences* 1997;9(1):81-9.  
29  
30 [60] Tanaka T, Tomotake M, Ueoka Y, et al. Clinical correlates associated with cognitive  
31 dysfunction in people with schizophrenia. *Psychiatry and clinical neurosciences* 2012  
32 Oct;66(6):491-8.  
33  
34 [61] Elie D, Poirier M, Chianetta JM, et al. Cognitive effects of antipsychotic dosage and  
35 polypharmacy: a study with the BACS in patients with schizophrenia and schizoaffective  
36 disorder. *Journal of Psychopharmacology* 2010 Jul;24(7):1037-44.  
37  
38 [62] Ballesteros A, Sánchez-Torres AM, López-Ilundain JM, et al. Is cognitive impairment  
39 associated with antipsychotic dose and anticholinergic equivalent loads in first-episode  
40 psychosis?. *Psychological medicine* 2018 Oct;48(13):2247-56.  
41  
42 [63] Hanna RC, Shalvoy A, Cullum CM, et al. Cognitive function in individuals with psychosis:  
43 moderation by adolescent cannabis use. *Schizophrenia bulletin* 2016;42(6),1496-1503.  
44  
45  
46  
47  
48  
49  
50  
51  
52  
53  
54  
55  
56  
57  
58  
59  
60

## Figure legends

*Figure 1.* A CONSORT based flowchart illustrating the number of participants and exclusions at each stage of the study trial.

*Figure 2.* Trajectory model of total PANSS score percentage change from baseline modelled over days since baseline assessment. The dotted linear trajectory reflects treatment non-responders and the complete line treatment responders. The grey dotted lines around each trajectory reflect the confidence intervals for trajectory each group. Percentages reflect the estimated amount of the sampled population included in each trajectory.

1  
2  
3  
4  
5  
6  
7  
8  
9  
10  
11  
12  
13  
14  
15  
16  
17  
18  
19  
20  
21  
22  
23  
24  
25  
26  
27  
28  
29  
30  
31  
32  
33  
34  
35  
36  
37  
38  
39  
40  
41  
42  
43  
44  
45  
46  
47  
48  
49  
50  
51  
52  
53  
54  
55  
56  
57  
58  
59  
60



1  
2  
3  
4  
5  
6  
7  
8  
9  
10  
11  
12  
13  
14  
15  
16  
17  
18  
19  
20  
21  
22  
23  
24  
25  
26  
27  
28  
29  
30  
31  
32  
33  
34  
35  
36  
37  
38  
39  
40  
41  
42  
43  
44  
45  
46  
47  
48  
49  
50  
51  
52  
53  
54  
55  
56  
57  
58  
59  
60



## Supplementary material

Table S.1

Results from univariable and multivariable logistic regression models for response status using PANSS total >20% reduction criteria and baseline BACS performance

| BACS task         | Unadjusted |      |              |      |         | Adjusted for age, gender and DUP |      |              |      |         |
|-------------------|------------|------|--------------|------|---------|----------------------------------|------|--------------|------|---------|
|                   | $\beta$    | SE   | 95%CI        | OR   | P-value | $\beta$                          | SE   | 95%CI        | OR   | P-value |
| Verbal Memory     | -0.01      | 0.03 | -0.07 ; 0.06 | 0.99 | .819    | <-0.01                           | 0.04 | -0.08 ; 0.07 | 1.00 | .920    |
| Digit Sequencing  | -0.10      | 0.10 | -0.29 ; 0.09 | 0.90 | .297    | -0.06                            | 0.11 | -0.27 ; 0.16 | 0.95 | .604    |
| Verbal Fluency    | 0.04       | 0.05 | -0.06 ; 0.14 | 1.04 | .403    | 0.07                             | 0.06 | -0.05 ; 0.18 | 1.07 | .259    |
| Token Motor       | 0.03       | 0.04 | -0.04 ; 0.10 | 1.03 | .432    | 0.06                             | 0.05 | -0.03 ; 0.15 | 1.06 | .218    |
| Symbol Coding     | -0.04      | 0.03 | -0.11 ; 0.02 | 0.96 | .206    | -0.05                            | 0.04 | -0.12 ; 0.03 | 0.96 | .237    |
| Tower of London   | 0.07       | 0.09 | -0.11 ; 0.24 | 1.07 | .445    | 0.07                             | 0.09 | -0.12 ; 0.25 | 1.07 | .465    |
| t score composite | <0.01      | 0.03 | -0.06 ; 0.07 | 1.00 | .924    | 0.01                             | 0.03 | -0.06 ; 0.07 | 1.00 | .892    |
| z score composite | 0.02       | 0.33 | -0.63 ; 0.66 | 1.02 | .960    | 0.03                             | 0.34 | -0.63 ; 0.69 | 1.03 | .931    |

Note. BACS = Brief Assessment of Cognition in Schizophrenia; DUP = duration of untreated psychosis; CIs = confidence intervals.

Table S.2

Results from unadjusted and adjusted growth curve models comparing trajectory groups on BACS performance across all visits

| BACS task         | Unadjusted |       |                |         | Adjusted for age, gender and DUP |      |               |         |
|-------------------|------------|-------|----------------|---------|----------------------------------|------|---------------|---------|
|                   | $\beta$    | SE    | 95%CI          | P-value | $\beta$                          | SE   | 95%CI         | P-value |
| Verbal Memory     | -2.15      | 45.79 | -13.49 ; 9.19  | .710    | -2.67                            | 5.88 | -14.20 ; 8.86 | .650    |
| Digit Sequencing  | -2.25      | 1.63  | -5.45 ; 1.095  | .167    | -2.03                            | 1.62 | -5.19 ; 1.14  | .210    |
| Verbal Fluency    | -0.90      | 3.29  | -7.36 ; 5.55   | .784    | -1.31                            | 2.99 | -7.17 ; 4.54  | .660    |
| Token Motor       | -2.00      | 6.39  | -14.52 ; 10.53 | .755    | -0.45                            | 5.89 | 11.99 ; 11.10 | .939    |
| Symbol Coding     | -3.81      | 5.56  | -14.71 ; 7.08  | .493    | -4.25                            | 5.42 | -14.87 ; 6.37 | .433    |
| Tower of London   | 0.18       | 1.56  | -2.87 ; 3.24   | .906    | 0.17                             | 1.57 | -2.90 ; 3.25  | .912    |
| t score composite | -2.49      | 5.70  | -13.66 ; 8.68  | .662    | -2.43                            | 5.78 | -13.76 ; 8.89 | .674    |
| z score composite | -0.25      | 0.57  | -1.37 ; 0.87   | .658    | -0.25                            | 0.58 | -1.38 ; 0.88  | .665    |

Note. BACS = Brief Assessment of Cognition in Schizophrenia; DUP = duration of untreated psychosis; CIs = confidence intervals

Table S.3

Results from unadjusted and adjusted growth curve models comparing PANSS >20% reduction groups on BACS performance across all visits

| BACS task         | Unadjusted |      |               |         | Adjusted for age, gender and DUP |      |               |         |
|-------------------|------------|------|---------------|---------|----------------------------------|------|---------------|---------|
|                   | $\beta$    | SE   | 95%CI         | P-value | $\beta$                          | SE   | 95%CI         | P-value |
| Verbal Memory     | -4.18      | 4.21 | -12.44 ; 4.08 | .321    | 3.27                             | 4.34 | -11.78 ; 5.23 | .451    |
| Digit Sequencing  | -2.36      | 1.35 | -5.01 ; 0.29  | .081    | -1.78                            | 1.34 | -4.41 ; 0.86  | .186    |
| Verbal Fluency    | -0.97      | 2.55 | -5.97 ; 4.02  | .703    | -0.54                            | 2.49 | -5.42 ; 4.35  | .830    |
| Token Motor       | 1.81       | 5.52 | -9.01 ; 12.62 | .744    | 5.60                             | 5.07 | -4.33 ; 15.53 | .269    |
| Symbol Coding     | -4.23      | 3.92 | -11.92 ; 3.46 | .281    | -4.13                            | 4.03 | -12.03 ; 3.78 | .306    |
| Tower of London   | -0.77      | 1.25 | -3.22 ; 1.68  | .538    | -0.56                            | 1.30 | -3.10 ; 1.98  | .667    |
| t score composite | -2.39      | 4.75 | -11.71 ; 6.93 | .615    | -1.56                            | 4.84 | -11.03 ; 7.92 | .747    |
| z score composite | -0.25      | 0.48 | -1.18 ; 0.68  | .600    | -0.17                            | 0.48 | -1.12 ; 0.78  | .728    |

Note. BACS = Brief Assessment of Cognition in Schizophrenia; DUP = duration of untreated psychosis; CIs = confidence intervals



Table S.4  
 Descriptive statistics of clinical and demographic variables for each trajectory group at baseline assessments

| Variable                                                                                           | Non-responder |        |        | Responder |        |        |
|----------------------------------------------------------------------------------------------------|---------------|--------|--------|-----------|--------|--------|
|                                                                                                    | N             | M      | SD     | N         | M      | SD     |
| Age (at consent)                                                                                   | 6             | 29.57  | 6.70   | 39        | 26.90  | 8.41   |
| Gender ( <i>male</i> )                                                                             | 6             | -      | -      | 27        | -      | -      |
| Gender ( <i>female</i> )                                                                           | 1             | -      | -      | 12        | -      | -      |
| Age of illness onset (years)                                                                       | 7             | 27.54  | 8.09   | 39        | 26.34  | 8.60   |
| Duration from 1 <sup>st</sup> Psychotic symptom (days) to baseline antipsychotic (DUP)             | 7             | 177.09 | 207.93 | 39        | 261.08 | 251.38 |
| Duration from 1 <sup>st</sup> contact with mental health services (days) to baseline antipsychotic | 7             | 461.89 | 801.88 | 39        | 325.88 | 567.82 |
| Chlorpromazine equivalents (mg/day)                                                                | 7             | 271.43 | 249.76 | 39        | 159.92 | 75.02  |
| Number of hospitalisations                                                                         | 7             | 1.00   | 1.00   | 39        | 0.87   | 0.57   |
| Years of education                                                                                 | 6             | 17.00  | 2.53   | 36        | 13.06  | 2.47   |
| PANSS positive                                                                                     | 7             | 11.14  | 6.67   | 38        | 12.08  | 4.44   |
| PANSS negative                                                                                     | 7             | 12.57  | 5.77   | 38        | 9.95   | 7.04   |
| PANSS general                                                                                      | 7             | 19.57  | 8.70   | 38        | 19.37  | 8.66   |
| PANSS total                                                                                        | 7             | 43.29  | 13.52  | 38        | 41.39  | 16.68  |

Note. PANSS = Positive and Negative Symptom Scale.

Table S.5  
 Baseline cognitive performance for both groups using >20% PANSS reduction criteria

| BACS measure     | N  | Non-responder |       | Responder |       |       |
|------------------|----|---------------|-------|-----------|-------|-------|
|                  |    | Mean          | SD    | N         | Mean  | SD    |
| Verbal Memory    | 13 | 37.54         | 8.27  | 20        | 36.65 | 12.73 |
| Digit Sequencing | 12 | 19.25         | 4.20  | 19        | 17.68 | 3.97  |
| Verbal Fluency   | 14 | 27.36         | 6.44  | 20        | 29.45 | 7.75  |
| Token Motor      | 13 | 63.23         | 10.94 | 18        | 66.39 | 11.24 |
| Symbol Coding    | 12 | 44.83         | 9.47  | 20        | 39.35 | 12.75 |
| Tower of London  | 12 | 14.17         | 5.11  | 17        | 15.41 | 3.79  |
| tscore composite | 10 | 26.30         | 13.35 | 17        | 26.77 | 12.28 |
| zscore composite | 10 | -2.36         | 1.31  | 17        | -2.34 | 1.22  |

*Note.* BACS = Brief Assessment of Cognition in Schizophrenia; PANSS = Positive and Negative Symptom Scale.

1  
2  
3  
4  
5  
6  
7  
8  
9  
10  
11  
12  
13  
14  
15  
16  
17  
18  
19  
20  
21  
22  
23  
24  
25  
26  
27  
28  
29  
30  
31  
32  
33  
34  
35  
36  
37  
38  
39  
40  
41  
42  
43  
44  
45  
46

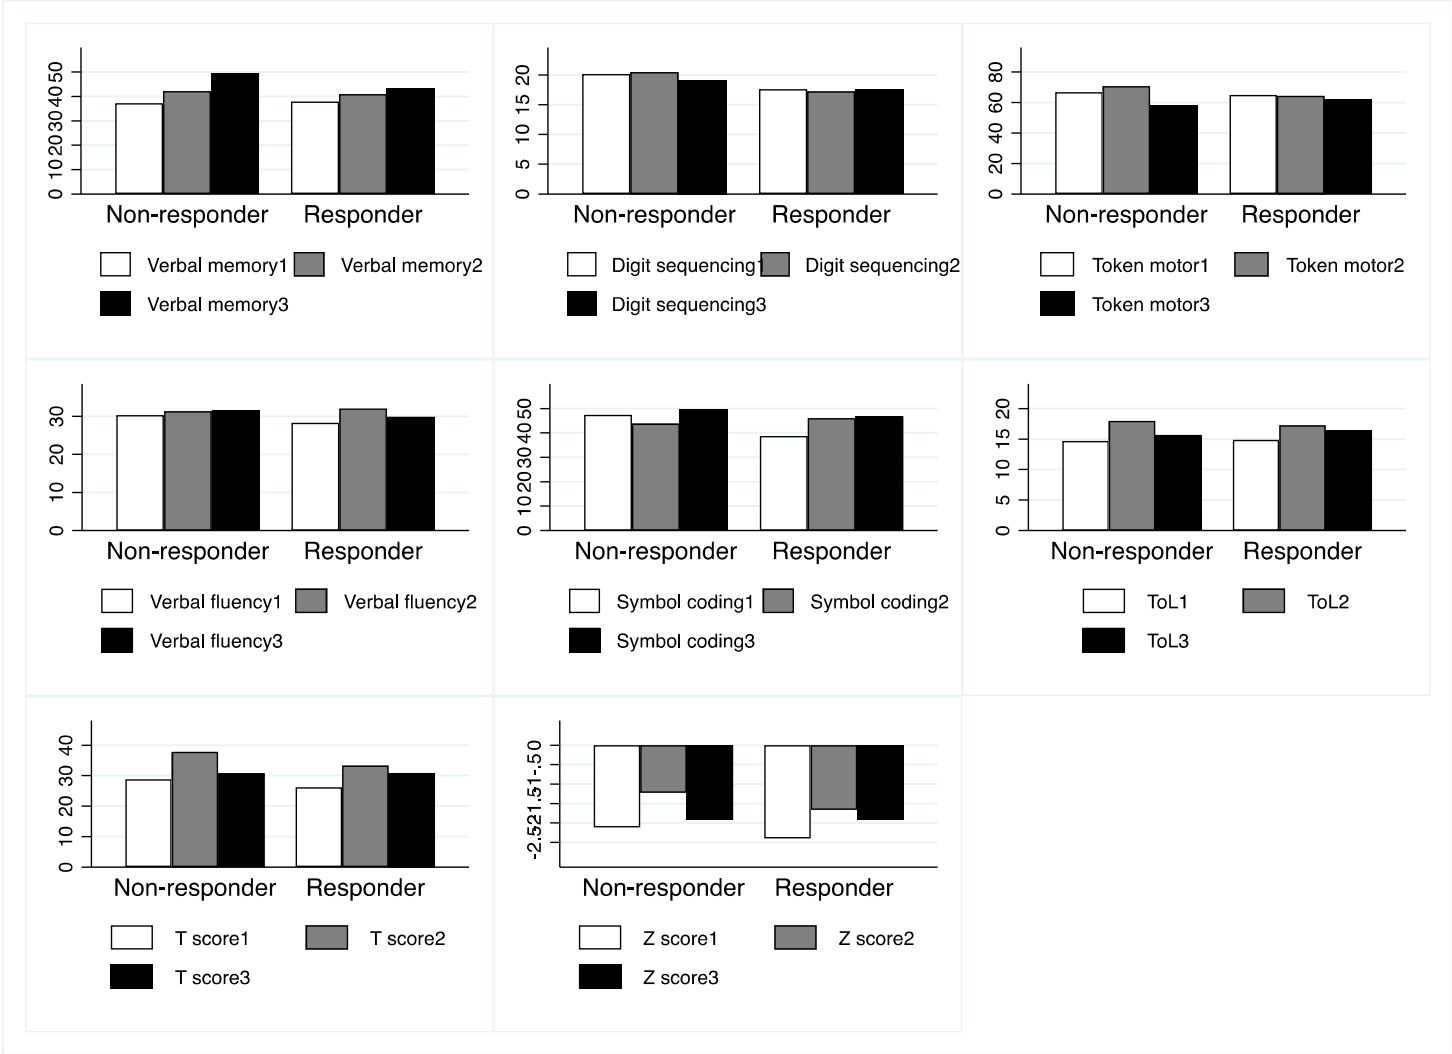

Figure S.1  
 Bar graphs comparing mean performance on BACS measures between trajectory groups (non-responder vs. responder) at each visit (*white* = baseline, *grey* = 2-week, *black* = 6-week)

Note. *BACS* = Brief Assessment of Cognition in Schizophrenia; *ToL* = Tower of London.

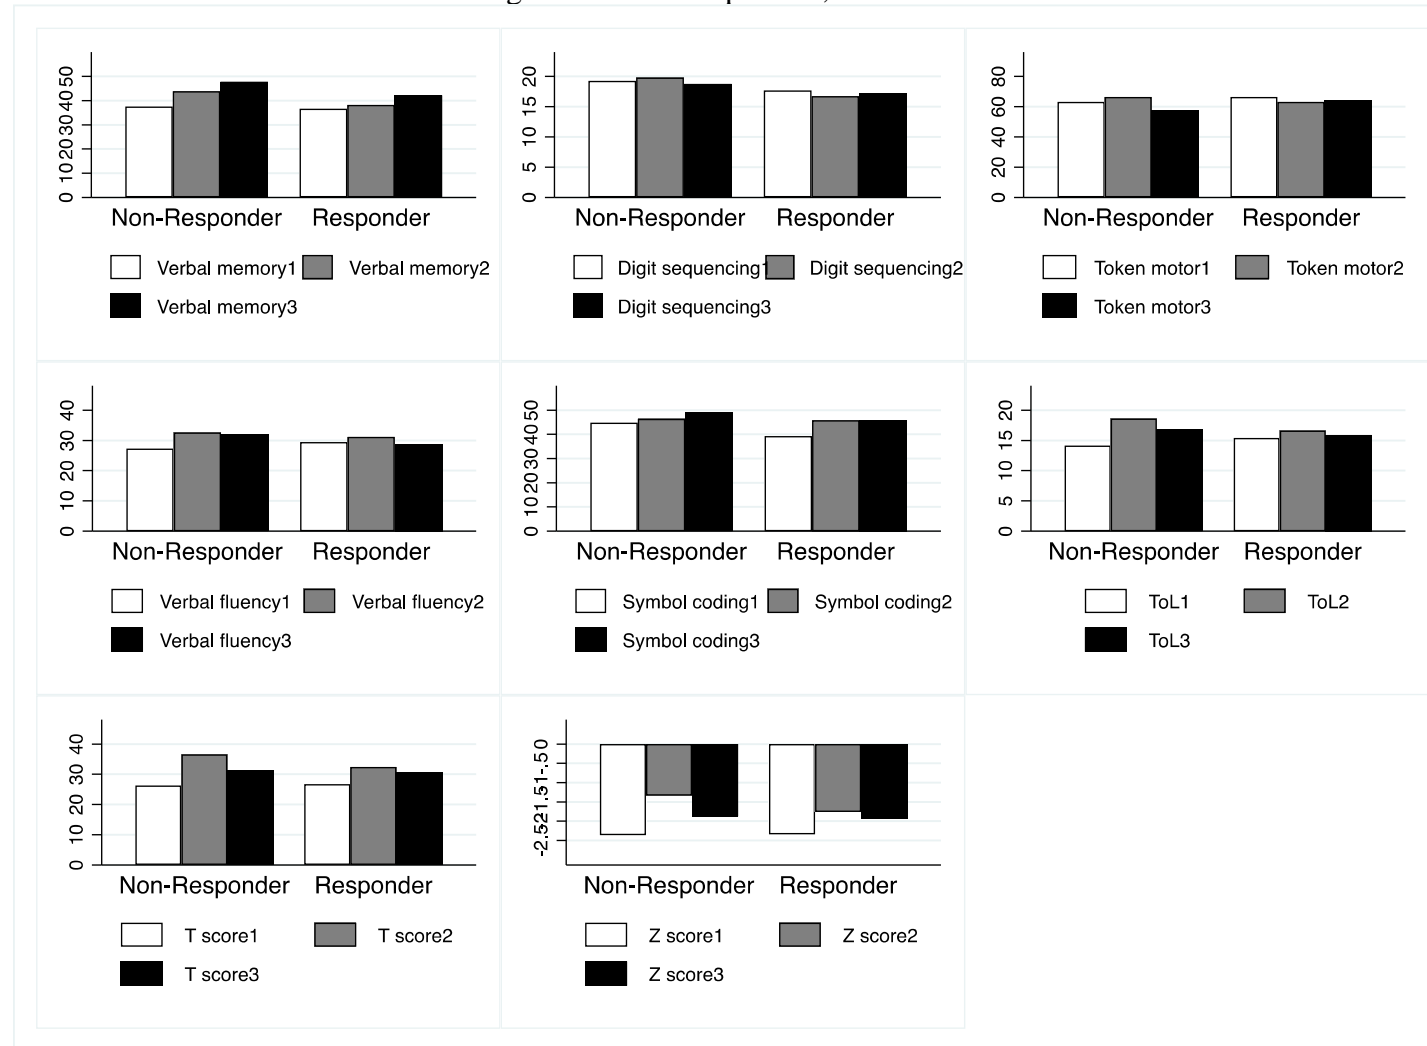

Figure S.2

Bar graphs comparing mean performance on BACS measures using >20% PANSS reduction criteria (non-responder vs. responder) at each visit (white = baseline, grey = 2-week, black = 6-week)

1  
2  
3  
4  
5  
6  
7  
8  
9  
10  
11  
12  
13  
14  
15  
16  
17  
18  
19  
20  
21  
22  
23  
24  
25  
26  
27  
28  
29  
30  
31  
32  
33  
34  
35  
36  
37  
38  
39  
40  
41  
42  
43  
44  
45  
46

Note. *BACS* = Brief Assessment of Cognition in Schizophrenia; *ToL* = Tower of London.

For peer review only

## STROBE Statement—checklist of items that should be included in reports of observational studies

|                           | Item No | Recommendation                                                                                                                                                                                                                                                                                                                                                                                                                                                         | Noted on pg. |
|---------------------------|---------|------------------------------------------------------------------------------------------------------------------------------------------------------------------------------------------------------------------------------------------------------------------------------------------------------------------------------------------------------------------------------------------------------------------------------------------------------------------------|--------------|
| <b>Title and abstract</b> | 1       | (a) Indicate the study's design with a commonly used term in the title or the abstract                                                                                                                                                                                                                                                                                                                                                                                 | 1,2,3        |
|                           |         | (b) Provide in the abstract an informative and balanced summary of what was done and what was found                                                                                                                                                                                                                                                                                                                                                                    | 1,2,3        |
| <b>Introduction</b>       |         |                                                                                                                                                                                                                                                                                                                                                                                                                                                                        |              |
| Background/rationale      | 2       | Explain the scientific background and rationale for the investigation being reported                                                                                                                                                                                                                                                                                                                                                                                   | 5,6          |
| Objectives                | 3       | State specific objectives, including any prespecified hypotheses                                                                                                                                                                                                                                                                                                                                                                                                       | 6            |
| <b>Methods</b>            |         |                                                                                                                                                                                                                                                                                                                                                                                                                                                                        |              |
| Study design              | 4       | Present key elements of study design early in the paper                                                                                                                                                                                                                                                                                                                                                                                                                | 7            |
| Setting                   | 5       | Describe the setting, locations, and relevant dates, including periods of recruitment, exposure, follow-up, and data collection                                                                                                                                                                                                                                                                                                                                        | 7            |
| Participants              | 6       | (a) <i>Cohort study</i> —Give the eligibility criteria, and the sources and methods of selection of participants. Describe methods of follow-up<br><i>Case-control study</i> —Give the eligibility criteria, and the sources and methods of case ascertainment and control selection. Give the rationale for the choice of cases and controls<br><i>Cross-sectional study</i> —Give the eligibility criteria, and the sources and methods of selection of participants | 7,8          |
|                           |         | (b) <i>Cohort study</i> —For matched studies, give matching criteria and number of exposed and unexposed<br><i>Case-control study</i> —For matched studies, give matching criteria and the number of controls per case                                                                                                                                                                                                                                                 | N/A          |
|                           |         |                                                                                                                                                                                                                                                                                                                                                                                                                                                                        |              |
| Variables                 | 7       | Clearly define all outcomes, exposures, predictors, potential confounders, and effect modifiers. Give diagnostic criteria, if applicable                                                                                                                                                                                                                                                                                                                               | 7,8          |
| Data sources/measurement  | 8*      | For each variable of interest, give sources of data and details of methods of assessment (measurement). Describe comparability of assessment methods if there is more than one group                                                                                                                                                                                                                                                                                   | 7,8          |
| Bias                      | 9       | Describe any efforts to address potential sources of bias                                                                                                                                                                                                                                                                                                                                                                                                              | 9            |
| Study size                | 10      | Explain how the study size was arrived at                                                                                                                                                                                                                                                                                                                                                                                                                              | N/A          |
| Quantitative variables    | 11      | Explain how quantitative variables were handled in the analyses. If applicable, describe which groupings were chosen and why                                                                                                                                                                                                                                                                                                                                           | 8,9          |
| Statistical methods       | 12      | (a) Describe all statistical methods, including those used to control for confounding                                                                                                                                                                                                                                                                                                                                                                                  | 8,9          |
|                           |         | (b) Describe any methods used to examine subgroups and interactions                                                                                                                                                                                                                                                                                                                                                                                                    | 8,9          |
|                           |         | (c) Explain how missing data were addressed                                                                                                                                                                                                                                                                                                                                                                                                                            | N/A          |
|                           |         | (d) <i>Cohort study</i> —If applicable, explain how loss to follow-up was addressed<br><i>Case-control study</i> —If applicable, explain how matching of cases and controls was addressed<br><i>Cross-sectional study</i> —If applicable, describe analytical methods taking account of sampling strategy                                                                                                                                                              | N/A          |
|                           |         | (e) Describe any sensitivity analyses                                                                                                                                                                                                                                                                                                                                                                                                                                  | 8,9          |

1  
2  
3  
4  
5  
6  
7  
8  
9  
10  
11  
12  
13  
14  
15  
16  
17  
18  
19  
20  
21  
22  
23  
24  
25  
26  
27  
28  
29  
30  
31  
32  
33  
34  
35  
36  
37  
38  
39  
40  
41  
42  
43  
44  
45  
46  
47  
48  
49  
50  
51  
52  
53  
54  
55  
56  
57  
58  
59  
60

Continued on next page

For peer review only

| <b>Results</b>           |     |                                                                                                                                                                                                              |                 |
|--------------------------|-----|--------------------------------------------------------------------------------------------------------------------------------------------------------------------------------------------------------------|-----------------|
| Participants             | 13* | (a) Report numbers of individuals at each stage of study—eg numbers potentially eligible, examined for eligibility, confirmed eligible, included in the study, completing follow-up, and analysed            | 6,7             |
|                          |     | (b) Give reasons for non-participation at each stage                                                                                                                                                         | 7,8             |
|                          |     | (c) Consider use of a flow diagram                                                                                                                                                                           | N/A             |
| Descriptive data         | 14* | (a) Give characteristics of study participants (eg demographic, clinical, social) and information on exposures and potential confounders                                                                     | 9,10            |
|                          |     | (b) Indicate number of participants with missing data for each variable of interest                                                                                                                          | N/A             |
|                          |     | (c) <i>Cohort study</i> —Summarise follow-up time (eg, average and total amount)                                                                                                                             | N/A             |
| Outcome data             | 15* | <i>Cohort study</i> —Report numbers of outcome events or summary measures over time                                                                                                                          | 10,11,supplem.  |
|                          |     | <i>Case-control study</i> —Report numbers in each exposure category, or summary measures of exposure                                                                                                         | N/A             |
|                          |     | <i>Cross-sectional study</i> —Report numbers of outcome events or summary measures                                                                                                                           | N/A             |
| Main results             | 16  | (a) Give unadjusted estimates and, if applicable, confounder-adjusted estimates and their precision (eg, 95% confidence interval). Make clear which confounders were adjusted for and why they were included | 17, supplem.    |
|                          |     | (b) Report category boundaries when continuous variables were categorized                                                                                                                                    | N/A             |
|                          |     | (c) If relevant, consider translating estimates of relative risk into absolute risk for a meaningful time period                                                                                             | 17, supplem.    |
| Other analyses           | 17  | Report other analyses done—eg analyses of subgroups and interactions, and sensitivity analyses                                                                                                               | 13-15, Supplem. |
| <b>Discussion</b>        |     |                                                                                                                                                                                                              |                 |
| Key results              | 18  | Summarise key results with reference to study objectives                                                                                                                                                     | 20,21           |
| Limitations              | 19  | Discuss limitations of the study, taking into account sources of potential bias or imprecision. Discuss both direction and magnitude of any potential bias                                                   | 23,24           |
| Interpretation           | 20  | Give a cautious overall interpretation of results considering objectives, limitations, multiplicity of analyses, results from similar studies, and other relevant evidence                                   | 20,21,23        |
| Generalisability         | 21  | Discuss the generalisability (external validity) of the study results                                                                                                                                        | 20,21,23        |
| <b>Other information</b> |     |                                                                                                                                                                                                              |                 |
| Funding                  | 22  | Give the source of funding and the role of the funders for the present study and, if applicable, for the original study on which the present article is based                                                | 25              |

\*Give information separately for cases and controls in case-control studies and, if applicable, for exposed and unexposed groups in cohort and cross-sectional studies.

**Note:** An Explanation and Elaboration article discusses each checklist item and gives methodological background and published examples of transparent reporting. The STROBE checklist is best used in conjunction with this article (freely available on the Web sites of PLoS Medicine at <http://www.plosmedicine.org/>, Annals of Internal Medicine at <http://www.annals.org/>, and Epidemiology at <http://www.epidem.com/>). Information on the STROBE Initiative is available at [www.strobe-statement.org](http://www.strobe-statement.org).
