# Supplementary material for: Cognitive function and treatment response trajectories in first-episode schizophrenia: evidence from a prospective cohort study
Source: PubMed Central journal article supplement (PMC9680154; doi:10.1136/bmjopen-2022-062570), 2022-11-21
Supplement: bmjopen-2022-062570supp001.pdf [file bmjopen-2022-062570supp001.pdf]

## Supplementary material

Table S.1

Results from univariable and multivariable logistic regression models for response status using PANSS total >20% reduction criteria and baseline BACS performance

| BACS task         | Unadjusted |      |              |      |         | Adjusted for age, gender and DUP |      |              |      |         |
|-------------------|------------|------|--------------|------|---------|----------------------------------|------|--------------|------|---------|
|                   | $\beta$    | SE   | 95%CI        | OR   | P-value | $\beta$                          | SE   | 95%CI        | OR   | P-value |
| Verbal Memory     | -0.01      | 0.03 | -0.07 ; 0.06 | 0.99 | .819    | <-0.01                           | 0.04 | -0.08 ; 0.07 | 1.00 | .920    |
| Digit Sequencing  | -0.10      | 0.10 | -0.29 ; 0.09 | 0.90 | .297    | -0.06                            | 0.11 | -0.27 ; 0.16 | 0.95 | .604    |
| Verbal Fluency    | 0.04       | 0.05 | -0.06 ; 0.14 | 1.04 | .403    | 0.07                             | 0.06 | -0.05 ; 0.18 | 1.07 | .259    |
| Token Motor       | 0.03       | 0.04 | -0.04 ; 0.10 | 1.03 | .432    | 0.06                             | 0.05 | -0.03 ; 0.15 | 1.06 | .218    |
| Symbol Coding     | -0.04      | 0.03 | -0.11 ; 0.02 | 0.96 | .206    | -0.05                            | 0.04 | -0.12 ; 0.03 | 0.96 | .237    |
| Tower of London   | 0.07       | 0.09 | -0.11 ; 0.24 | 1.07 | .445    | 0.07                             | 0.09 | -0.12 ; 0.25 | 1.07 | .465    |
| t score composite | <0.01      | 0.03 | -0.06 ; 0.07 | 1.00 | .924    | 0.01                             | 0.03 | -0.06 ; 0.07 | 1.00 | .892    |
| z score composite | 0.02       | 0.33 | -0.63 ; 0.66 | 1.02 | .960    | 0.03                             | 0.34 | -0.63 ; 0.69 | 1.03 | .931    |

Note. BACS = Brief Assessment of Cognition in Schizophrenia; DUP = duration of untreated psychosis; CIs = confidence intervals.

Table S.2

Results from unadjusted and adjusted growth curve models comparing trajectory groups on BACS performance across all visits

| BACS task         | Unadjusted |       |                |         | Adjusted for age, gender and DUP |      |               |         |
|-------------------|------------|-------|----------------|---------|----------------------------------|------|---------------|---------|
|                   | $\beta$    | SE    | 95%CI          | P-value | $\beta$                          | SE   | 95%CI         | P-value |
| Verbal Memory     | -2.15      | 45.79 | -13.49 ; 9.19  | .710    | -2.67                            | 5.88 | -14.20 ; 8.86 | .650    |
| Digit Sequencing  | -2.25      | 1.63  | -5.45 ; 1.095  | .167    | -2.03                            | 1.62 | -5.19 ; 1.14  | .210    |
| Verbal Fluency    | -0.90      | 3.29  | -7.36 ; 5.55   | .784    | -1.31                            | 2.99 | -7.17 ; 4.54  | .660    |
| Token Motor       | -2.00      | 6.39  | -14.52 ; 10.53 | .755    | -0.45                            | 5.89 | 11.99 ; 11.10 | .939    |
| Symbol Coding     | -3.81      | 5.56  | -14.71 ; 7.08  | .493    | -4.25                            | 5.42 | -14.87 ; 6.37 | .433    |
| Tower of London   | 0.18       | 1.56  | -2.87 ; 3.24   | .906    | 0.17                             | 1.57 | -2.90 ; 3.25  | .912    |
| t score composite | -2.49      | 5.70  | -13.66 ; 8.68  | .662    | -2.43                            | 5.78 | -13.76 ; 8.89 | .674    |
| z score composite | -0.25      | 0.57  | -1.37 ; 0.87   | .658    | -0.25                            | 0.58 | -1.38 ; 0.88  | .665    |

Note. BACS = Brief Assessment of Cognition in Schizophrenia; DUP = duration of untreated psychosis; CIs = confidence intervals

Table S.3

Results from unadjusted and adjusted growth curve models comparing PANSS >20% reduction groups on BACS performance across all visits

| BACS task         | Unadjusted |      |               |         | Adjusted for age, gender and DUP |      |               |         |
|-------------------|------------|------|---------------|---------|----------------------------------|------|---------------|---------|
|                   | $\beta$    | SE   | 95%CI         | P-value | $\beta$                          | SE   | 95%CI         | P-value |
| Verbal Memory     | -4.18      | 4.21 | -12.44 ; 4.08 | .321    | 3.27                             | 4.34 | -11.78 ; 5.23 | .451    |
| Digit Sequencing  | -2.36      | 1.35 | -5.01 ; 0.29  | .081    | -1.78                            | 1.34 | -4.41 ; 0.86  | .186    |
| Verbal Fluency    | -0.97      | 2.55 | -5.97 ; 4.02  | .703    | -0.54                            | 2.49 | -5.42 ; 4.35  | .830    |
| Token Motor       | 1.81       | 5.52 | -9.01 ; 12.62 | .744    | 5.60                             | 5.07 | -4.33 ; 15.53 | .269    |
| Symbol Coding     | -4.23      | 3.92 | -11.92 ; 3.46 | .281    | -4.13                            | 4.03 | -12.03 ; 3.78 | .306    |
| Tower of London   | -0.77      | 1.25 | -3.22 ; 1.68  | .538    | -0.56                            | 1.30 | -3.10 ; 1.98  | .667    |
| t score composite | -2.39      | 4.75 | -11.71 ; 6.93 | .615    | -1.56                            | 4.84 | -11.03 ; 7.92 | .747    |
| z score composite | -0.25      | 0.48 | -1.18 ; 0.68  | .600    | -0.17                            | 0.48 | -1.12 ; 0.78  | .728    |

Note. BACS = Brief Assessment of Cognition in Schizophrenia; DUP = duration of untreated psychosis; CIs = confidence intervals

Table S.4

*Descriptive statistics of clinical and demographic variables for each trajectory group at baseline assessments*

| Variable                                                                                           | Non-responder |        |        | Responder |        |        |
|----------------------------------------------------------------------------------------------------|---------------|--------|--------|-----------|--------|--------|
|                                                                                                    | N             | M      | SD     | N         | M      | SD     |
| Age (at consent)                                                                                   | 6             | 29.57  | 6.70   | 39        | 26.90  | 8.41   |
| Gender ( <i>male</i> )                                                                             | 6             | -      | -      | 27        | -      | -      |
| Gender ( <i>female</i> )                                                                           | 1             | -      | -      | 12        | -      | -      |
| Age of illness onset (years)                                                                       | 7             | 27.54  | 8.09   | 39        | 26.34  | 8.60   |
| Duration from 1 <sup>st</sup> Psychotic symptom (days) to baseline antipsychotic (DUP)             | 7             | 177.09 | 207.93 | 39        | 261.08 | 251.38 |
| Duration from 1 <sup>st</sup> contact with mental health services (days) to baseline antipsychotic | 7             | 461.89 | 801.88 | 39        | 325.88 | 567.82 |
| Chlorpromazine equivalents (mg/day)                                                                | 7             | 271.43 | 249.76 | 39        | 159.92 | 75.02  |
| Number of hospitalisations                                                                         | 7             | 1.00   | 1.00   | 39        | 0.87   | 0.57   |
| Years of education                                                                                 | 6             | 17.00  | 2.53   | 36        | 13.06  | 2.47   |
| PANSS positive                                                                                     | 7             | 11.14  | 6.67   | 38        | 12.08  | 4.44   |
| PANSS negative                                                                                     | 7             | 12.57  | 5.77   | 38        | 9.95   | 7.04   |
| PANSS general                                                                                      | 7             | 19.57  | 8.70   | 38        | 19.37  | 8.66   |
| PANSS total                                                                                        | 7             | 43.29  | 13.52  | 38        | 41.39  | 16.68  |

*Note.* PANSS = Positive and Negative Symptom Scale.

Table S.5

*Baseline cognitive performance for both groups using >20% PANSS reduction criteria*

| BACS measure      | N  | Non-responder |       | Responder |       |       |
|-------------------|----|---------------|-------|-----------|-------|-------|
|                   |    | Mean          | SD    | N         | Mean  | SD    |
| Verbal Memory     | 13 | 37.54         | 8.27  | 20        | 36.65 | 12.73 |
| Digit Sequencing  | 12 | 19.25         | 4.20  | 19        | 17.68 | 3.97  |
| Verbal Fluency    | 14 | 27.36         | 6.44  | 20        | 29.45 | 7.75  |
| Token Motor       | 13 | 63.23         | 10.94 | 18        | 66.39 | 11.24 |
| Symbol Coding     | 12 | 44.83         | 9.47  | 20        | 39.35 | 12.75 |
| Tower of London   | 12 | 14.17         | 5.11  | 17        | 15.41 | 3.79  |
| t-score composite | 10 | 26.30         | 13.35 | 17        | 26.77 | 12.28 |
| z-score composite | 10 | -2.36         | 1.31  | 17        | -2.34 | 1.22  |

*Note.* BACS = Brief Assessment of Cognition in Schizophrenia; PANSS = Positive and Negative Symptom Scale.

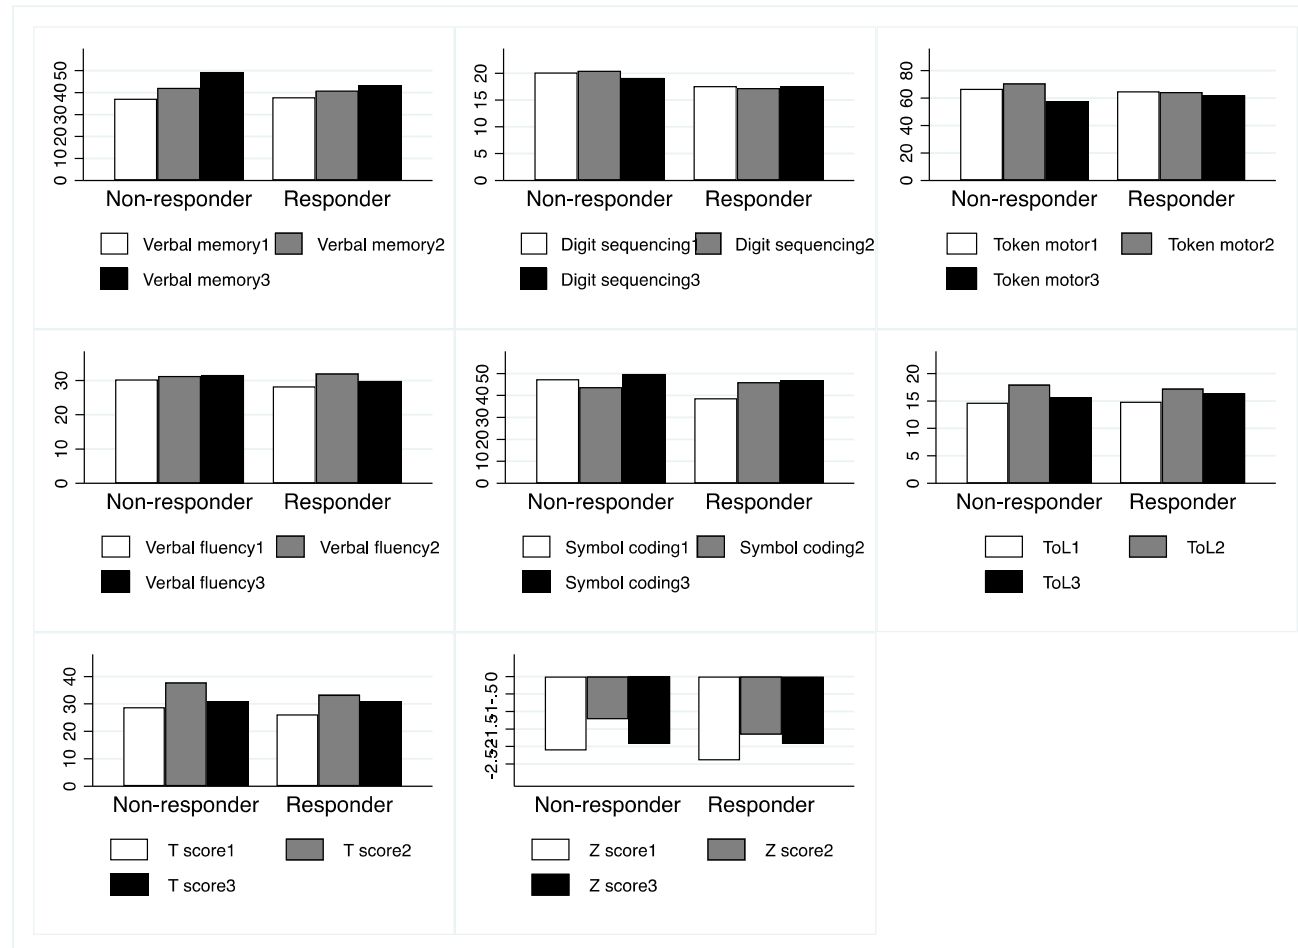

Figure S.1

Bar graphs comparing mean performance on BACS measures between trajectory groups (non-responder vs. responder) at each visit (*white* = baseline, *grey* = 2-week, *black* = 6-week)

Note. *BACS* = Brief Assessment of Cognition in Schizophrenia; *ToL* = Tower of London.

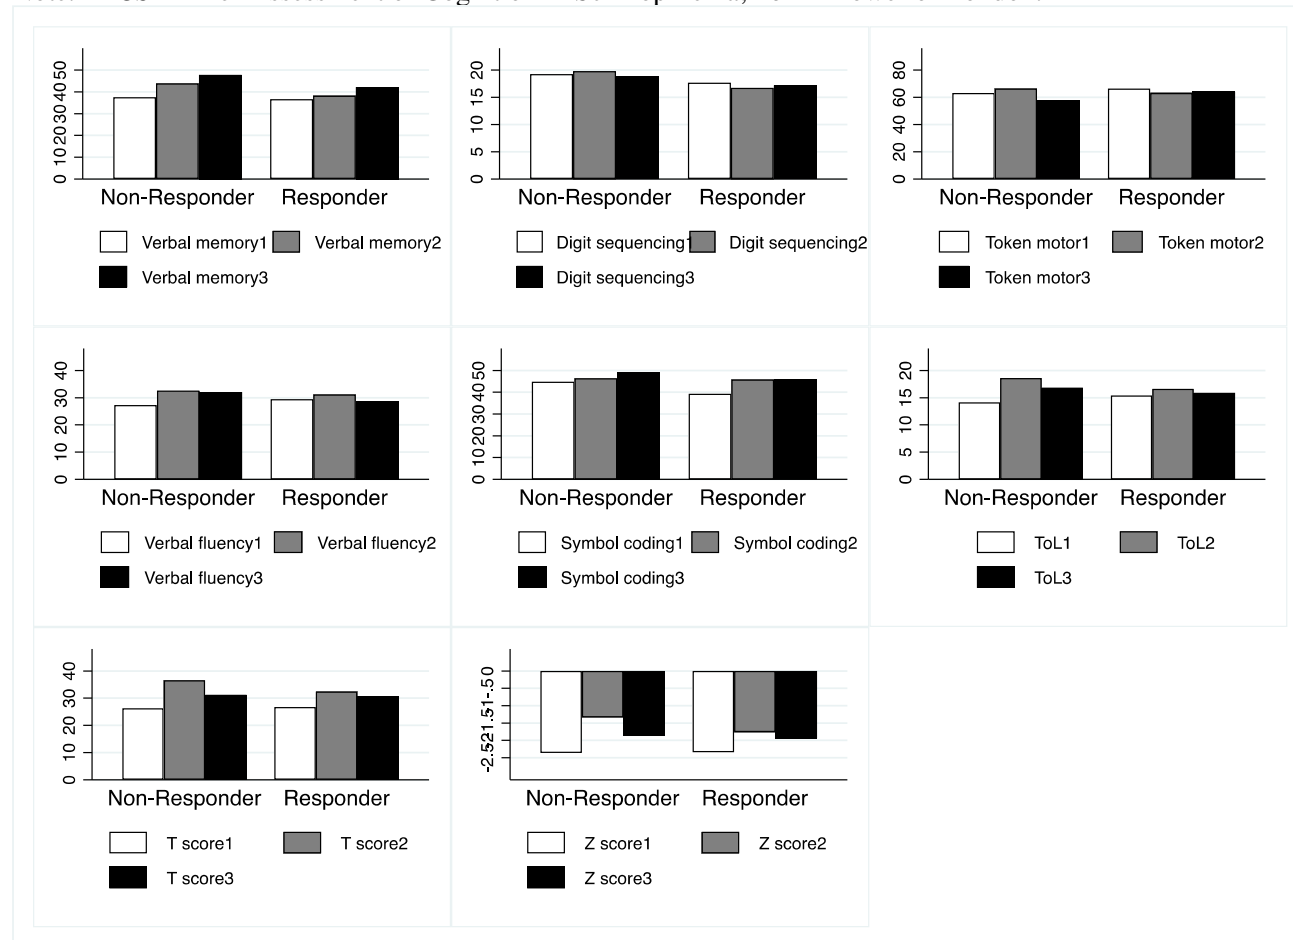

Figure S.2

Bar graphs comparing mean performance on BACS measures using >20% PANSS reduction criteria (non-responder vs. responder) at each visit (*white* = baseline, *grey* = 2-week, *black* = 6-week)

Note. *BACS* = Brief Assessment of Cognition in Schizophrenia; *ToL* = Tower of London.
